# Supplementary material
Source: publisher figshare collection journal article supplement (https://acs.figshare.com/ndownloader/files/5341843)
Supplement: Supplementary file 1 [file 5341843]

  
data_2a 
  
_audit_creation_method            SHELXL-97 
_chemical_name_systematic 
; 
 ? 
; 
_chemical_name_common             ? 
_chemical_melting_point           ? 
_chemical_formula_moiety          ? 
_chemical_formula_sum 
 'C21 H26 Cl2 N O3 V' 
_chemical_formula_weight          462.27 
  
loop_ 
 _atom_type_symbol 
 _atom_type_description 
 _atom_type_scat_dispersion_real 
 _atom_type_scat_dispersion_imag 
 _atom_type_scat_source 
 'C'  'C'   0.0033   0.0016 
 'International Tables Vol C Tables 4.2.6.8 and 6.1.1.4' 
 'H'  'H'   0.0000   0.0000 
 'International Tables Vol C Tables 4.2.6.8 and 6.1.1.4' 
 'N'  'N'   0.0061   0.0033 
 'International Tables Vol C Tables 4.2.6.8 and 6.1.1.4' 
 'O'  'O'   0.0106   0.0060 
 'International Tables Vol C Tables 4.2.6.8 and 6.1.1.4' 
 'Cl'  'Cl'   0.1484   0.1585 
 'International Tables Vol C Tables 4.2.6.8 and 6.1.1.4' 
 'V'  'V'   0.3005   0.5294 
 'International Tables Vol C Tables 4.2.6.8 and 6.1.1.4' 
  
_symmetry_cell_setting            Triclinic 
_symmetry_space_group_name_H-M    P-1 
  
loop_ 
 _symmetry_equiv_pos_as_xyz 
 'x, y, z' 
 '-x, -y, -z' 
  
_cell_length_a                    7.4606(6) 
_cell_length_b                    11.4975(9) 
_cell_length_c                    13.9387(11) 
_cell_angle_alpha                 109.7700(10) 
_cell_angle_beta                  90.0490(10) 
_cell_angle_gamma                 107.6790(10) 
_cell_volume                      1064.85(15) 
_cell_formula_units_Z             2 
_cell_measurement_temperature     187(2) 
_cell_measurement_reflns_used     2900 
_cell_measurement_theta_min       2.88 
_cell_measurement_theta_max       25.98 
  
_exptl_crystal_description        ? 
_exptl_crystal_colour             ? 
_exptl_crystal_size_max           0.31 
_exptl_crystal_size_mid           0.20 
_exptl_crystal_size_min           0.08 
_exptl_crystal_density_meas       ? 
_exptl_crystal_density_diffrn     1.442 
_exptl_crystal_density_method     'not measured' 
_exptl_crystal_F_000              480 
_exptl_absorpt_coefficient_mu     0.738 
_exptl_absorpt_correction_type    Multi-scan 
_exptl_absorpt_correction_T_min   0.8045 
_exptl_absorpt_correction_T_max   0.9433 
_exptl_absorpt_process_details    ? 
  
_exptl_special_details 
; 
 ? 
; 
  
_diffrn_ambient_temperature       187(2) 
_diffrn_radiation_wavelength      0.71073 
_diffrn_radiation_type            MoK\a 
_diffrn_radiation_source          'fine-focus sealed tube' 
_diffrn_radiation_monochromator   graphite 
_diffrn_measurement_device_type   'CCD area detector' 
_diffrn_measurement_method        'phi and omega scans' 
_diffrn_detector_area_resol_mean  ? 
_diffrn_standards_number          ? 
_diffrn_standards_interval_count  ? 
_diffrn_standards_interval_time   ? 
_diffrn_standards_decay_%         ? 
_diffrn_reflns_number             5863 
_diffrn_reflns_av_R_equivalents   0.0128 
_diffrn_reflns_av_sigmaI/netI     0.0252 
_diffrn_reflns_limit_h_min        -9 
_diffrn_reflns_limit_h_max        9 
_diffrn_reflns_limit_k_min        -14 
_diffrn_reflns_limit_k_max        8 
_diffrn_reflns_limit_l_min        -17 
_diffrn_reflns_limit_l_max        17 
_diffrn_reflns_theta_min          1.56 
_diffrn_reflns_theta_max          26.02 
_reflns_number_total              4078 
_reflns_number_gt                 3537 
_reflns_threshold_expression      >2sigma(I) 
  
_computing_data_collection        'Bruker SMART' 
_computing_cell_refinement        'Bruker SMART' 
_computing_data_reduction         'Bruker SAINT' 
_computing_structure_solution     'SHELXS-97 (Sheldrick, 1990)' 
_computing_structure_refinement   'SHELXL-97 (Sheldrick, 1997)' 
_computing_molecular_graphics     'Bruker SHELXTL' 
_computing_publication_material   'Bruker SHELXTL' 
  
_refine_special_details 
; 
 Refinement of F^2^ against ALL reflections.  The weighted R-factor wR and 
 goodness of fit S are based on F^2^, conventional R-factors R are based 
 on F, with F set to zero for negative F^2^. The threshold expression of 
 F^2^ > 2sigma(F^2^) is used only for calculating R-factors(gt) etc. and is 
 not relevant to the choice of reflections for refinement.  R-factors based 
 on F^2^ are statistically about twice as large as those based on F, and R- 
 factors based on ALL data will be even larger. 
; 
  
_refine_ls_structure_factor_coef  Fsqd 
_refine_ls_matrix_type            full 
_refine_ls_weighting_scheme       calc 
_refine_ls_weighting_details 
 'calc w=1/[\s^2^(Fo^2^)+(0.0503P)^2^+0.8430P] where P=(Fo^2^+2Fc^2^)/3' 
_atom_sites_solution_primary      direct 
_atom_sites_solution_secondary    difmap 
_atom_sites_solution_hydrogens    geom 
_refine_ls_hydrogen_treatment     constr 
_refine_ls_extinction_method      none 
_refine_ls_extinction_coef        ? 
_refine_ls_number_reflns          4078 
_refine_ls_number_parameters      253 
_refine_ls_number_restraints      0 
_refine_ls_R_factor_all           0.0457 
_refine_ls_R_factor_gt            0.0398 
_refine_ls_wR_factor_ref          0.1041 
_refine_ls_wR_factor_gt           0.0998 
_refine_ls_goodness_of_fit_ref    1.040 
_refine_ls_restrained_S_all       1.040 
_refine_ls_shift/su_max           0.000 
_refine_ls_shift/su_mean          0.000 
  
loop_ 
 _atom_site_label 
 _atom_site_type_symbol 
 _atom_site_fract_x 
 _atom_site_fract_y 
 _atom_site_fract_z 
 _atom_site_U_iso_or_equiv 
 _atom_site_adp_type 
 _atom_site_occupancy 
 _atom_site_symmetry_multiplicity 
 _atom_site_calc_flag 
 _atom_site_refinement_flags 
 _atom_site_disorder_assembly 
 _atom_site_disorder_group 
V1 V 0.48221(5) 0.65995(3) 0.28472(3) 0.02361(12) Uani 1 1 d . . . 
Cl1 Cl 0.63846(9) 0.69695(6) 0.44509(4) 0.03738(16) Uani 1 1 d . . . 
Cl2 Cl 0.30191(9) 0.61137(6) 0.12944(4) 0.03409(16) Uani 1 1 d . . . 
N1 N 0.6331(3) 0.53873(17) 0.19967(14) 0.0250(4) Uani 1 1 d . . . 
O1 O 0.6621(2) 0.80395(15) 0.26883(12) 0.0318(4) Uani 1 1 d . . . 
O2 O 0.2678(2) 0.50230(15) 0.30736(11) 0.0281(4) Uani 1 1 d . . . 
O3 O 0.3318(3) 0.78808(17) 0.35850(13) 0.0364(4) Uani 1 1 d . . . 
C1 C 0.7713(3) 0.8100(2) 0.19437(17) 0.0286(5) Uani 1 1 d . . . 
C2 C 0.8492(4) 0.9300(2) 0.18188(19) 0.0358(6) Uani 1 1 d . . . 
H2 H 0.8172 1.0035 0.2240 0.043 Uiso 1 1 calc R . . 
C3 C 0.9718(4) 0.9437(2) 0.1094(2) 0.0390(6) Uani 1 1 d . . . 
H3 H 1.0230 1.0262 0.1019 0.047 Uiso 1 1 calc R . . 
C4 C 1.0210(4) 0.8373(3) 0.04711(19) 0.0374(6) Uani 1 1 d . . . 
H4 H 1.1056 0.8468 -0.0027 0.045 Uiso 1 1 calc R . . 
C5 C 0.9463(3) 0.7191(2) 0.05838(18) 0.0315(5) Uani 1 1 d . . . 
H5 H 0.9805 0.6467 0.0160 0.038 Uiso 1 1 calc R . . 
C6 C 0.8197(3) 0.7019(2) 0.13135(17) 0.0270(5) Uani 1 1 d . . . 
C7 C 0.7537(3) 0.5746(2) 0.13987(17) 0.0267(5) Uani 1 1 d . . . 
H7 H 0.8036 0.5105 0.0975 0.032 Uiso 1 1 calc R . . 
C8 C 0.5856(3) 0.4041(2) 0.19164(17) 0.0263(5) Uani 1 1 d . . . 
C9 C 0.5275(4) 0.3047(2) 0.09550(18) 0.0333(5) Uani 1 1 d . . . 
H9 H 0.5221 0.3253 0.0353 0.040 Uiso 1 1 calc R . . 
C10 C 0.4778(4) 0.1755(2) 0.0890(2) 0.0405(6) Uani 1 1 d . . . 
H10 H 0.4399 0.1075 0.0238 0.049 Uiso 1 1 calc R . . 
C11 C 0.4829(4) 0.1445(2) 0.1762(2) 0.0389(6) Uani 1 1 d . . . 
H11 H 0.4484 0.0557 0.1709 0.047 Uiso 1 1 calc R . . 
C12 C 0.5383(4) 0.2432(3) 0.2711(2) 0.0371(6) Uani 1 1 d . . . 
H12 H 0.5414 0.2221 0.3312 0.045 Uiso 1 1 calc R . . 
C13 C 0.5895(3) 0.3730(2) 0.27913(18) 0.0309(5) Uani 1 1 d . . . 
H13 H 0.6273 0.4404 0.3446 0.037 Uiso 1 1 calc R . . 
C14 C 0.1285(4) 0.3968(2) 0.22507(19) 0.0359(6) Uani 1 1 d . . . 
H14A H 0.1901 0.3649 0.1631 0.043 Uiso 1 1 calc R . . 
H14B H 0.0275 0.4274 0.2066 0.043 Uiso 1 1 calc R . . 
C15 C 0.0485(4) 0.2910(3) 0.2682(2) 0.0446(7) Uani 1 1 d . . . 
H15A H 0.1277 0.2335 0.2579 0.054 Uiso 1 1 calc R . . 
H15B H -0.0826 0.2375 0.2366 0.054 Uiso 1 1 calc R . . 
C16 C 0.0538(4) 0.3684(3) 0.3814(2) 0.0479(7) Uani 1 1 d . . . 
H16A H -0.0535 0.4032 0.3939 0.057 Uiso 1 1 calc R . . 
H16B H 0.0508 0.3141 0.4238 0.057 Uiso 1 1 calc R . . 
C17 C 0.2397(4) 0.4765(3) 0.40338(19) 0.0399(6) Uani 1 1 d . . . 
H17A H 0.2349 0.5554 0.4598 0.048 Uiso 1 1 calc R . . 
H17B H 0.3437 0.4492 0.4229 0.048 Uiso 1 1 calc R . . 
C18 C 0.2252(5) 0.7887(3) 0.4433(3) 0.0622(9) Uani 1 1 d . . . 
H18A H 0.2992 0.7830 0.4995 0.075 Uiso 1 1 calc R . . 
H18B H 0.1061 0.7139 0.4223 0.075 Uiso 1 1 calc R . . 
C19 C 0.1833(6) 0.9162(4) 0.4776(3) 0.0771(12) Uani 1 1 d . . . 
H19A H 0.0589 0.9062 0.5046 0.093 Uiso 1 1 calc R . . 
H19B H 0.2826 0.9852 0.5314 0.093 Uiso 1 1 calc R . . 
C20 C 0.1820(7) 0.9467(4) 0.3857(3) 0.0800(13) Uani 1 1 d . . . 
H20A H 0.2250 1.0424 0.4029 0.096 Uiso 1 1 calc R . . 
H20B H 0.0524 0.9096 0.3490 0.096 Uiso 1 1 calc R . . 
C21 C 0.3123(6) 0.8886(3) 0.3208(3) 0.0604(9) Uani 1 1 d . . . 
H21A H 0.2587 0.8495 0.2477 0.073 Uiso 1 1 calc R . . 
H21B H 0.4367 0.9557 0.3279 0.073 Uiso 1 1 calc R . . 
  
loop_ 
 _atom_site_aniso_label 
 _atom_site_aniso_U_11 
 _atom_site_aniso_U_22 
 _atom_site_aniso_U_33 
 _atom_site_aniso_U_23 
 _atom_site_aniso_U_13 
 _atom_site_aniso_U_12 
V1 0.0295(2) 0.0219(2) 0.0205(2) 0.00831(15) 0.00417(15) 0.00887(16) 
Cl1 0.0473(4) 0.0351(3) 0.0261(3) 0.0090(2) -0.0057(2) 0.0104(3) 
Cl2 0.0408(3) 0.0406(3) 0.0246(3) 0.0133(2) 0.0013(2) 0.0165(3) 
N1 0.0286(10) 0.0232(9) 0.0242(9) 0.0085(8) 0.0021(7) 0.0095(8) 
O1 0.0391(9) 0.0225(8) 0.0316(9) 0.0087(7) 0.0095(7) 0.0079(7) 
O2 0.0342(9) 0.0277(8) 0.0226(8) 0.0108(6) 0.0057(6) 0.0082(7) 
O3 0.0517(11) 0.0367(9) 0.0324(9) 0.0158(8) 0.0163(8) 0.0263(9) 
C1 0.0296(12) 0.0279(12) 0.0267(11) 0.0110(9) 0.0013(9) 0.0054(9) 
C2 0.0449(15) 0.0253(12) 0.0355(13) 0.0109(10) 0.0050(11) 0.0088(11) 
C3 0.0443(15) 0.0320(13) 0.0398(14) 0.0197(11) 0.0051(12) 0.0031(11) 
C4 0.0363(14) 0.0423(14) 0.0338(13) 0.0191(11) 0.0069(11) 0.0066(11) 
C5 0.0315(12) 0.0348(13) 0.0293(12) 0.0129(10) 0.0038(10) 0.0103(10) 
C6 0.0273(11) 0.0271(11) 0.0261(11) 0.0113(9) -0.0001(9) 0.0061(9) 
C7 0.0302(12) 0.0271(11) 0.0246(11) 0.0089(9) 0.0019(9) 0.0122(10) 
C8 0.0263(11) 0.0242(11) 0.0328(12) 0.0123(9) 0.0059(9) 0.0118(9) 
C9 0.0429(14) 0.0291(12) 0.0289(12) 0.0112(10) 0.0055(10) 0.0121(11) 
C10 0.0477(16) 0.0259(12) 0.0421(15) 0.0060(11) 0.0037(12) 0.0106(11) 
C11 0.0397(14) 0.0257(12) 0.0546(16) 0.0174(12) 0.0067(12) 0.0115(11) 
C12 0.0368(14) 0.0384(14) 0.0458(15) 0.0253(12) 0.0058(11) 0.0140(11) 
C13 0.0323(12) 0.0322(12) 0.0314(12) 0.0125(10) 0.0030(10) 0.0136(10) 
C14 0.0330(13) 0.0343(13) 0.0313(12) 0.0062(10) 0.0032(10) 0.0045(11) 
C15 0.0312(14) 0.0342(14) 0.0665(19) 0.0192(13) 0.0064(13) 0.0065(11) 
C16 0.0366(15) 0.0673(19) 0.0513(17) 0.0393(15) 0.0124(13) 0.0122(14) 
C17 0.0488(16) 0.0469(15) 0.0311(13) 0.0232(12) 0.0132(11) 0.0144(13) 
C18 0.077(2) 0.066(2) 0.067(2) 0.0329(18) 0.0415(18) 0.0446(19) 
C19 0.102(3) 0.066(2) 0.090(3) 0.034(2) 0.057(2) 0.058(2) 
C20 0.121(3) 0.076(3) 0.059(2) 0.0055(19) -0.003(2) 0.074(3) 
C21 0.096(3) 0.0538(19) 0.0578(19) 0.0317(16) 0.0270(18) 0.0465(19) 
  
_geom_special_details 
; 
 All esds (except the esd in the dihedral angle between two l.s. planes) 
 are estimated using the full covariance matrix.  The cell esds are taken 
 into account individually in the estimation of esds in distances, angles 
 and torsion angles; correlations between esds in cell parameters are only 
 used when they are defined by crystal symmetry.  An approximate (isotropic) 
 treatment of cell esds is used for estimating esds involving l.s. planes. 
; 
  
loop_ 
 _geom_bond_atom_site_label_1 
 _geom_bond_atom_site_label_2 
 _geom_bond_distance 
 _geom_bond_site_symmetry_2 
 _geom_bond_publ_flag 
V1 O1 1.8684(16) . ? 
V1 N1 2.1099(18) . ? 
V1 O3 2.1140(16) . ? 
V1 O2 2.1379(16) . ? 
V1 Cl2 2.3509(7) . ? 
V1 Cl1 2.3639(7) . ? 
N1 C7 1.298(3) . ? 
N1 C8 1.443(3) . ? 
O1 C1 1.327(3) . ? 
O2 C17 1.468(3) . ? 
O2 C14 1.469(3) . ? 
O3 C18 1.424(3) . ? 
O3 C21 1.464(3) . ? 
C1 C2 1.396(3) . ? 
C1 C6 1.407(3) . ? 
C2 C3 1.380(4) . ? 
C2 H2 0.9500 . ? 
C3 C4 1.393(4) . ? 
C3 H3 0.9500 . ? 
C4 C5 1.366(3) . ? 
C4 H4 0.9500 . ? 
C5 C6 1.411(3) . ? 
C5 H5 0.9500 . ? 
C6 C7 1.442(3) . ? 
C7 H7 0.9500 . ? 
C8 C13 1.385(3) . ? 
C8 C9 1.397(3) . ? 
C9 C10 1.389(3) . ? 
C9 H9 0.9500 . ? 
C10 C11 1.380(4) . ? 
C10 H10 0.9500 . ? 
C11 C12 1.381(4) . ? 
C11 H11 0.9500 . ? 
C12 C13 1.387(3) . ? 
C12 H12 0.9500 . ? 
C13 H13 0.9500 . ? 
C14 C15 1.500(4) . ? 
C14 H14A 0.9900 . ? 
C14 H14B 0.9900 . ? 
C15 C16 1.521(4) . ? 
C15 H15A 0.9900 . ? 
C15 H15B 0.9900 . ? 
C16 C17 1.502(4) . ? 
C16 H16A 0.9900 . ? 
C16 H16B 0.9900 . ? 
C17 H17A 0.9900 . ? 
C17 H17B 0.9900 . ? 
C18 C19 1.510(4) . ? 
C18 H18A 0.9900 . ? 
C18 H18B 0.9900 . ? 
C19 C20 1.438(5) . ? 
C19 H19A 0.9900 . ? 
C19 H19B 0.9900 . ? 
C20 C21 1.482(5) . ? 
C20 H20A 0.9900 . ? 
C20 H20B 0.9900 . ? 
C21 H21A 0.9900 . ? 
C21 H21B 0.9900 . ? 
  
loop_ 
 _geom_angle_atom_site_label_1 
 _geom_angle_atom_site_label_2 
 _geom_angle_atom_site_label_3 
 _geom_angle 
 _geom_angle_site_symmetry_1 
 _geom_angle_site_symmetry_3 
 _geom_angle_publ_flag 
O1 V1 N1 89.58(7) . . ? 
O1 V1 O3 87.08(7) . . ? 
N1 V1 O3 174.62(7) . . ? 
O1 V1 O2 176.79(6) . . ? 
N1 V1 O2 93.63(7) . . ? 
O3 V1 O2 89.71(7) . . ? 
O1 V1 Cl2 92.28(6) . . ? 
N1 V1 Cl2 87.59(5) . . ? 
O3 V1 Cl2 88.33(5) . . ? 
O2 V1 Cl2 87.73(5) . . ? 
O1 V1 Cl1 92.70(6) . . ? 
N1 V1 Cl1 94.13(5) . . ? 
O3 V1 Cl1 90.23(5) . . ? 
O2 V1 Cl1 87.21(5) . . ? 
Cl2 V1 Cl1 174.75(3) . . ? 
C7 N1 C8 115.87(18) . . ? 
C7 N1 V1 121.77(15) . . ? 
C8 N1 V1 121.61(14) . . ? 
C1 O1 V1 129.81(14) . . ? 
C17 O2 C14 108.74(18) . . ? 
C17 O2 V1 127.04(14) . . ? 
C14 O2 V1 124.15(13) . . ? 
C18 O3 C21 109.0(2) . . ? 
C18 O3 V1 128.82(16) . . ? 
C21 O3 V1 122.06(15) . . ? 
O1 C1 C2 118.5(2) . . ? 
O1 C1 C6 122.6(2) . . ? 
C2 C1 C6 118.8(2) . . ? 
C3 C2 C1 121.1(2) . . ? 
C3 C2 H2 119.4 . . ? 
C1 C2 H2 119.4 . . ? 
C2 C3 C4 120.4(2) . . ? 
C2 C3 H3 119.8 . . ? 
C4 C3 H3 119.8 . . ? 
C5 C4 C3 119.3(2) . . ? 
C5 C4 H4 120.3 . . ? 
C3 C4 H4 120.3 . . ? 
C4 C5 C6 121.6(2) . . ? 
C4 C5 H5 119.2 . . ? 
C6 C5 H5 119.2 . . ? 
C1 C6 C5 118.8(2) . . ? 
C1 C6 C7 123.7(2) . . ? 
C5 C6 C7 117.5(2) . . ? 
N1 C7 C6 126.5(2) . . ? 
N1 C7 H7 116.7 . . ? 
C6 C7 H7 116.7 . . ? 
C13 C8 C9 119.9(2) . . ? 
C13 C8 N1 120.3(2) . . ? 
C9 C8 N1 119.8(2) . . ? 
C10 C9 C8 119.2(2) . . ? 
C10 C9 H9 120.4 . . ? 
C8 C9 H9 120.4 . . ? 
C11 C10 C9 120.9(2) . . ? 
C11 C10 H10 119.6 . . ? 
C9 C10 H10 119.6 . . ? 
C10 C11 C12 119.6(2) . . ? 
C10 C11 H11 120.2 . . ? 
C12 C11 H11 120.2 . . ? 
C11 C12 C13 120.4(2) . . ? 
C11 C12 H12 119.8 . . ? 
C13 C12 H12 119.8 . . ? 
C8 C13 C12 120.0(2) . . ? 
C8 C13 H13 120.0 . . ? 
C12 C13 H13 120.0 . . ? 
O2 C14 C15 105.2(2) . . ? 
O2 C14 H14A 110.7 . . ? 
C15 C14 H14A 110.7 . . ? 
O2 C14 H14B 110.7 . . ? 
C15 C14 H14B 110.7 . . ? 
H14A C14 H14B 108.8 . . ? 
C14 C15 C16 102.4(2) . . ? 
C14 C15 H15A 111.3 . . ? 
C16 C15 H15A 111.3 . . ? 
C14 C15 H15B 111.3 . . ? 
C16 C15 H15B 111.3 . . ? 
H15A C15 H15B 109.2 . . ? 
C17 C16 C15 102.6(2) . . ? 
C17 C16 H16A 111.3 . . ? 
C15 C16 H16A 111.3 . . ? 
C17 C16 H16B 111.3 . . ? 
C15 C16 H16B 111.3 . . ? 
H16A C16 H16B 109.2 . . ? 
O2 C17 C16 105.2(2) . . ? 
O2 C17 H17A 110.7 . . ? 
C16 C17 H17A 110.7 . . ? 
O2 C17 H17B 110.7 . . ? 
C16 C17 H17B 110.7 . . ? 
H17A C17 H17B 108.8 . . ? 
O3 C18 C19 106.0(3) . . ? 
O3 C18 H18A 110.5 . . ? 
C19 C18 H18A 110.5 . . ? 
O3 C18 H18B 110.5 . . ? 
C19 C18 H18B 110.5 . . ? 
H18A C18 H18B 108.7 . . ? 
C20 C19 C18 103.8(3) . . ? 
C20 C19 H19A 111.0 . . ? 
C18 C19 H19A 111.0 . . ? 
C20 C19 H19B 111.0 . . ? 
C18 C19 H19B 111.0 . . ? 
H19A C19 H19B 109.0 . . ? 
C19 C20 C21 107.2(3) . . ? 
C19 C20 H20A 110.3 . . ? 
C21 C20 H20A 110.3 . . ? 
C19 C20 H20B 110.3 . . ? 
C21 C20 H20B 110.3 . . ? 
H20A C20 H20B 108.5 . . ? 
O3 C21 C20 105.3(3) . . ? 
O3 C21 H21A 110.7 . . ? 
C20 C21 H21A 110.7 . . ? 
O3 C21 H21B 110.7 . . ? 
C20 C21 H21B 110.7 . . ? 
H21A C21 H21B 108.8 . . ? 
  
_diffrn_measured_fraction_theta_max    0.969 
_diffrn_reflns_theta_full              26.02 
_diffrn_measured_fraction_theta_full   0.969 
_refine_diff_density_max    0.606 
_refine_diff_density_min   -0.401 
_refine_diff_density_rms    0.059 

  
data_2b 
  
_audit_creation_method            SHELXL-97 
_chemical_name_systematic 
; 
 ? 
; 
_chemical_name_common             ? 
_chemical_melting_point           ? 
_chemical_formula_moiety          ? 
_chemical_formula_sum 
 'C22 H25 Cl2 F3 N O3 V' 
_chemical_formula_weight          530.27 
  
loop_ 
 _atom_type_symbol 
 _atom_type_description 
 _atom_type_scat_dispersion_real 
 _atom_type_scat_dispersion_imag 
 _atom_type_scat_source 
 'C'  'C'   0.0033   0.0016 
 'International Tables Vol C Tables 4.2.6.8 and 6.1.1.4' 
 'H'  'H'   0.0000   0.0000 
 'International Tables Vol C Tables 4.2.6.8 and 6.1.1.4' 
 'N'  'N'   0.0061   0.0033 
 'International Tables Vol C Tables 4.2.6.8 and 6.1.1.4' 
 'O'  'O'   0.0106   0.0060 
 'International Tables Vol C Tables 4.2.6.8 and 6.1.1.4' 
 'F'  'F'   0.0171   0.0103 
 'International Tables Vol C Tables 4.2.6.8 and 6.1.1.4' 
 'Cl'  'Cl'   0.1484   0.1585 
 'International Tables Vol C Tables 4.2.6.8 and 6.1.1.4' 
 'V'  'V'   0.3005   0.5294 
 'International Tables Vol C Tables 4.2.6.8 and 6.1.1.4' 
  
_symmetry_cell_setting            Triclinic 
_symmetry_space_group_name_H-M    P-1 
  
loop_ 
 _symmetry_equiv_pos_as_xyz 
 'x, y, z' 
 '-x, -y, -z' 
  
_cell_length_a                    7.6147(9) 
_cell_length_b                    12.0671(14) 
_cell_length_c                    13.7396(16) 
_cell_angle_alpha                 67.631(2) 
_cell_angle_beta                  85.279(2) 
_cell_angle_gamma                 86.104(2) 
_cell_volume                      1162.6(2) 
_cell_formula_units_Z             2 
_cell_measurement_temperature     187(2) 
_cell_measurement_reflns_used     1873 
_cell_measurement_theta_min       4.21 
_cell_measurement_theta_max       25.10 
  
_exptl_crystal_description        ? 
_exptl_crystal_colour             ? 
_exptl_crystal_size_max           0.15 
_exptl_crystal_size_mid           0.10 
_exptl_crystal_size_min           0.10 
_exptl_crystal_density_meas       ? 
_exptl_crystal_density_diffrn     1.515 
_exptl_crystal_density_method     'not measured' 
_exptl_crystal_F_000              544 
_exptl_absorpt_coefficient_mu     0.705 
_exptl_absorpt_correction_type    multi-scan 
_exptl_absorpt_correction_T_min   0.9004 
_exptl_absorpt_correction_T_max   0.9361 
_exptl_absorpt_process_details    ? 
  
_exptl_special_details 
; 
 ? 
; 
  
_diffrn_ambient_temperature       187(2) 
_diffrn_radiation_wavelength      0.71073 
_diffrn_radiation_type            MoK\a 
_diffrn_radiation_source          'fine-focus sealed tube' 
_diffrn_radiation_monochromator   graphite 
_diffrn_measurement_device_type   'CCD area detector' 
_diffrn_measurement_method        'phi and omega scans' 
_diffrn_detector_area_resol_mean  ? 
_diffrn_standards_number          ? 
_diffrn_standards_interval_count  ? 
_diffrn_standards_interval_time   ? 
_diffrn_standards_decay_%         ? 
_diffrn_reflns_number             6542 
_diffrn_reflns_av_R_equivalents   0.0190 
_diffrn_reflns_av_sigmaI/netI     0.0454 
_diffrn_reflns_limit_h_min        -9 
_diffrn_reflns_limit_h_max        9 
_diffrn_reflns_limit_k_min        -14 
_diffrn_reflns_limit_k_max        10 
_diffrn_reflns_limit_l_min        -16 
_diffrn_reflns_limit_l_max        16 
_diffrn_reflns_theta_min          1.61 
_diffrn_reflns_theta_max          25.99 
_reflns_number_total              4440 
_reflns_number_gt                 3402 
_reflns_threshold_expression      >2sigma(I) 
  
_computing_data_collection        'Bruker SMART' 
_computing_cell_refinement        'Bruker SMART' 
_computing_data_reduction         'Bruker SAINT' 
_computing_structure_solution     'SHELXS-97 (Sheldrick, 1990)' 
_computing_structure_refinement   'SHELXL-97 (Sheldrick, 1997)' 
_computing_molecular_graphics     'Bruker SHELXTL' 
_computing_publication_material   'Bruker SHELXTL' 
  
_refine_special_details 
; 
 Refinement of F^2^ against ALL reflections.  The weighted R-factor wR and 
 goodness of fit S are based on F^2^, conventional R-factors R are based 
 on F, with F set to zero for negative F^2^. The threshold expression of 
 F^2^ > 2sigma(F^2^) is used only for calculating R-factors(gt) etc. and is 
 not relevant to the choice of reflections for refinement.  R-factors based 
 on F^2^ are statistically about twice as large as those based on F, and R- 
 factors based on ALL data will be even larger. 
; 
  
_refine_ls_structure_factor_coef  Fsqd 
_refine_ls_matrix_type            full 
_refine_ls_weighting_scheme       calc 
_refine_ls_weighting_details 
 'calc w=1/[\s^2^(Fo^2^)+(0.0470P)^2^+1.5075P] where P=(Fo^2^+2Fc^2^)/3' 
_atom_sites_solution_primary      direct 
_atom_sites_solution_secondary    difmap 
_atom_sites_solution_hydrogens    geom 
_refine_ls_hydrogen_treatment     constr 
_refine_ls_extinction_method      none 
_refine_ls_extinction_coef        ? 
_refine_ls_number_reflns          4440 
_refine_ls_number_parameters      289 
_refine_ls_number_restraints      0 
_refine_ls_R_factor_all           0.0687 
_refine_ls_R_factor_gt            0.0499 
_refine_ls_wR_factor_ref          0.1255 
_refine_ls_wR_factor_gt           0.1157 
_refine_ls_goodness_of_fit_ref    1.054 
_refine_ls_restrained_S_all       1.054 
_refine_ls_shift/su_max           0.000 
_refine_ls_shift/su_mean          0.000 
  
loop_ 
 _atom_site_label 
 _atom_site_type_symbol 
 _atom_site_fract_x 
 _atom_site_fract_y 
 _atom_site_fract_z 
 _atom_site_U_iso_or_equiv 
 _atom_site_adp_type 
 _atom_site_occupancy 
 _atom_site_symmetry_multiplicity 
 _atom_site_calc_flag 
 _atom_site_refinement_flags 
 _atom_site_disorder_assembly 
 _atom_site_disorder_group 
V1 V 0.33262(7) 0.13355(5) 0.20539(4) 0.02473(16) Uani 1 1 d . . . 
Cl1 Cl 0.19533(12) 0.08068(9) 0.08185(7) 0.0369(2) Uani 1 1 d . . . 
Cl2 Cl 0.45554(12) 0.17271(8) 0.34179(7) 0.0352(2) Uani 1 1 d . . . 
F1 F 0.7515(3) -0.4557(2) 0.52481(18) 0.0562(7) Uani 1 1 d . . . 
F2 F 0.6355(3) -0.5054(2) 0.4107(2) 0.0584(7) Uani 1 1 d . . . 
F3 F 0.9092(3) -0.4705(2) 0.3936(2) 0.0551(7) Uani 1 1 d . . . 
N1 N 0.5708(4) 0.0526(2) 0.1688(2) 0.0264(6) Uani 1 1 d . . . 
O1 O 0.3985(3) 0.2791(2) 0.10085(18) 0.0310(5) Uani 1 1 d . . . 
O2 O 0.2356(3) -0.0265(2) 0.31944(17) 0.0313(6) Uani 1 1 d . . . 
O3 O 0.0965(3) 0.2205(2) 0.24066(19) 0.0315(5) Uani 1 1 d . . . 
C1 C 0.4973(5) 0.2998(3) 0.0115(3) 0.0291(8) Uani 1 1 d . . . 
C2 C 0.4731(5) 0.4103(3) -0.0718(3) 0.0343(8) Uani 1 1 d . . . 
H2 H 0.3839 0.4662 -0.0648 0.041 Uiso 1 1 calc R . . 
C3 C 0.5779(6) 0.4383(4) -0.1640(3) 0.0428(10) Uani 1 1 d . . . 
H3 H 0.5583 0.5127 -0.2207 0.051 Uiso 1 1 calc R . . 
C4 C 0.7124(6) 0.3586(4) -0.1749(3) 0.0436(10) Uani 1 1 d . . . 
H4 H 0.7859 0.3790 -0.2380 0.052 Uiso 1 1 calc R . . 
C5 C 0.7376(5) 0.2503(3) -0.0934(3) 0.0370(9) Uani 1 1 d . . . 
H5 H 0.8300 0.1966 -0.1007 0.044 Uiso 1 1 calc R . . 
C6 C 0.6298(5) 0.2171(3) 0.0006(3) 0.0296(8) Uani 1 1 d . . . 
C7 C 0.6634(4) 0.1021(3) 0.0802(3) 0.0291(8) Uani 1 1 d . . . 
H7 H 0.7634 0.0570 0.0674 0.035 Uiso 1 1 calc R . . 
C8 C 0.6251(4) -0.0680(3) 0.2332(3) 0.0279(7) Uani 1 1 d . . . 
C9 C 0.6339(5) -0.1013(3) 0.3409(3) 0.0320(8) Uani 1 1 d . . . 
H9 H 0.6110 -0.0435 0.3722 0.038 Uiso 1 1 calc R . . 
C10 C 0.6764(5) -0.2202(3) 0.4032(3) 0.0341(8) Uani 1 1 d . . . 
H10 H 0.6815 -0.2436 0.4772 0.041 Uiso 1 1 calc R . . 
C11 C 0.7112(4) -0.3043(3) 0.3575(3) 0.0314(8) Uani 1 1 d . . . 
C12 C 0.7042(5) -0.2694(3) 0.2489(3) 0.0355(8) Uani 1 1 d . . . 
H12 H 0.7297 -0.3266 0.2171 0.043 Uiso 1 1 calc R . . 
C13 C 0.6607(5) -0.1527(3) 0.1874(3) 0.0332(8) Uani 1 1 d . . . 
H13 H 0.6549 -0.1297 0.1135 0.040 Uiso 1 1 calc R . . 
C14 C 0.7522(5) -0.4330(3) 0.4221(3) 0.0396(9) Uani 1 1 d . . . 
C15 C 0.1940(5) -0.1341(3) 0.3027(3) 0.0391(9) Uani 1 1 d . . . 
H15A H 0.2875 -0.1544 0.2570 0.047 Uiso 1 1 calc R . . 
H15B H 0.0801 -0.1227 0.2696 0.047 Uiso 1 1 calc R . . 
C16 C 0.1841(6) -0.2306(4) 0.4110(4) 0.0507(11) Uani 1 1 d . . . 
H16A H 0.0985 -0.2912 0.4162 0.061 Uiso 1 1 calc R . . 
H16B H 0.3009 -0.2712 0.4299 0.061 Uiso 1 1 calc R . . 
C17 C 0.1235(8) -0.1633(5) 0.4802(4) 0.0734(16) Uani 1 1 d . . . 
H17A H -0.0062 -0.1658 0.4935 0.088 Uiso 1 1 calc R . . 
H17B H 0.1784 -0.1997 0.5488 0.088 Uiso 1 1 calc R . . 
C18 C 0.1752(8) -0.0414(4) 0.4264(3) 0.0660(15) Uani 1 1 d . . . 
H18A H 0.2710 -0.0244 0.4627 0.079 Uiso 1 1 calc R . . 
H18B H 0.0738 0.0148 0.4257 0.079 Uiso 1 1 calc R . . 
C19 C 0.1016(5) 0.3435(3) 0.2359(3) 0.0384(9) Uani 1 1 d . . . 
H19A H 0.1934 0.3881 0.1827 0.046 Uiso 1 1 calc R . . 
H19B H 0.1266 0.3440 0.3053 0.046 Uiso 1 1 calc R . . 
C20 C -0.0781(7) 0.3982(4) 0.2053(5) 0.0714(16) Uani 1 1 d . . . 
H20A H -0.1503 0.4007 0.2677 0.086 Uiso 1 1 calc R . . 
H20B H -0.0690 0.4810 0.1523 0.086 Uiso 1 1 calc R . . 
C21 C -0.1588(6) 0.3212(4) 0.1604(4) 0.0589(13) Uani 1 1 d . . . 
H21A H -0.2888 0.3228 0.1723 0.071 Uiso 1 1 calc R . . 
H21B H -0.1275 0.3465 0.0839 0.071 Uiso 1 1 calc R . . 
C22 C -0.0803(5) 0.2006(3) 0.2198(3) 0.0394(9) Uani 1 1 d . . . 
H22A H -0.1506 0.1606 0.2867 0.047 Uiso 1 1 calc R . . 
H22B H -0.0757 0.1498 0.1775 0.047 Uiso 1 1 calc R . . 
  
loop_ 
 _atom_site_aniso_label 
 _atom_site_aniso_U_11 
 _atom_site_aniso_U_22 
 _atom_site_aniso_U_33 
 _atom_site_aniso_U_23 
 _atom_site_aniso_U_13 
 _atom_site_aniso_U_12 
V1 0.0264(3) 0.0248(3) 0.0232(3) -0.0096(2) -0.0007(2) -0.0004(2) 
Cl1 0.0402(5) 0.0451(6) 0.0307(5) -0.0197(4) -0.0032(4) -0.0044(4) 
Cl2 0.0358(5) 0.0413(5) 0.0344(5) -0.0211(4) -0.0062(4) 0.0034(4) 
F1 0.0727(18) 0.0448(15) 0.0395(14) -0.0040(11) -0.0124(12) 0.0142(12) 
F2 0.0598(16) 0.0356(14) 0.0700(17) -0.0052(12) -0.0180(13) -0.0066(11) 
F3 0.0455(14) 0.0451(15) 0.0665(16) -0.0144(13) -0.0065(12) 0.0172(11) 
N1 0.0293(15) 0.0255(15) 0.0248(14) -0.0106(12) -0.0007(11) 0.0012(12) 
O1 0.0347(13) 0.0249(13) 0.0317(13) -0.0094(10) 0.0008(10) -0.0010(10) 
O2 0.0408(14) 0.0264(13) 0.0259(12) -0.0105(10) 0.0070(10) -0.0031(10) 
O3 0.0266(12) 0.0291(13) 0.0425(14) -0.0181(11) -0.0013(10) 0.0005(10) 
C1 0.0330(19) 0.0276(19) 0.0285(18) -0.0116(15) -0.0026(14) -0.0068(14) 
C2 0.040(2) 0.0270(19) 0.034(2) -0.0093(16) -0.0064(16) -0.0041(15) 
C3 0.059(3) 0.035(2) 0.032(2) -0.0067(17) -0.0055(18) -0.0140(19) 
C4 0.056(3) 0.045(2) 0.0273(19) -0.0103(18) 0.0114(17) -0.019(2) 
C5 0.043(2) 0.037(2) 0.033(2) -0.0161(17) 0.0040(16) -0.0059(17) 
C6 0.0348(19) 0.0269(19) 0.0278(18) -0.0103(15) -0.0011(14) -0.0062(15) 
C7 0.0291(18) 0.0317(19) 0.0303(18) -0.0156(16) -0.0022(14) -0.0027(14) 
C8 0.0283(18) 0.0294(19) 0.0258(17) -0.0108(15) -0.0020(14) 0.0016(14) 
C9 0.0315(19) 0.035(2) 0.0323(19) -0.0163(16) -0.0057(15) 0.0059(15) 
C10 0.035(2) 0.041(2) 0.0253(18) -0.0117(16) -0.0046(15) 0.0039(16) 
C11 0.0251(18) 0.0295(19) 0.035(2) -0.0077(16) -0.0056(14) 0.0045(14) 
C12 0.041(2) 0.032(2) 0.039(2) -0.0196(17) -0.0019(16) 0.0025(16) 
C13 0.039(2) 0.033(2) 0.0275(18) -0.0121(16) -0.0018(15) 0.0017(16) 
C14 0.036(2) 0.037(2) 0.041(2) -0.0099(18) -0.0068(17) 0.0028(17) 
C15 0.046(2) 0.030(2) 0.044(2) -0.0181(18) 0.0090(18) -0.0082(17) 
C16 0.046(2) 0.031(2) 0.064(3) -0.002(2) -0.008(2) -0.0096(18) 
C17 0.110(4) 0.069(4) 0.036(2) -0.011(2) 0.008(3) -0.038(3) 
C18 0.101(4) 0.051(3) 0.037(2) -0.013(2) 0.030(2) -0.004(3) 
C19 0.037(2) 0.032(2) 0.054(2) -0.0244(19) -0.0034(17) -0.0006(16) 
C20 0.072(3) 0.043(3) 0.110(4) -0.037(3) -0.047(3) 0.021(2) 
C21 0.051(3) 0.046(3) 0.078(3) -0.018(2) -0.027(2) 0.002(2) 
C22 0.0273(19) 0.042(2) 0.054(2) -0.023(2) -0.0044(17) -0.0034(16) 
  
_geom_special_details 
; 
 All esds (except the esd in the dihedral angle between two l.s. planes) 
 are estimated using the full covariance matrix.  The cell esds are taken 
 into account individually in the estimation of esds in distances, angles 
 and torsion angles; correlations between esds in cell parameters are only 
 used when they are defined by crystal symmetry.  An approximate (isotropic) 
 treatment of cell esds is used for estimating esds involving l.s. planes. 
; 
  
loop_ 
 _geom_bond_atom_site_label_1 
 _geom_bond_atom_site_label_2 
 _geom_bond_distance 
 _geom_bond_site_symmetry_2 
 _geom_bond_publ_flag 
V1 O1 1.865(2) . ? 
V1 O2 2.105(2) . ? 
V1 N1 2.116(3) . ? 
V1 O3 2.135(2) . ? 
V1 Cl1 2.3638(10) . ? 
V1 Cl2 2.3738(10) . ? 
F1 C14 1.331(4) . ? 
F2 C14 1.345(4) . ? 
F3 C14 1.330(4) . ? 
N1 C7 1.303(4) . ? 
N1 C8 1.439(4) . ? 
O1 C1 1.333(4) . ? 
O2 C18 1.450(4) . ? 
O2 C15 1.461(4) . ? 
O3 C22 1.453(4) . ? 
O3 C19 1.464(4) . ? 
C1 C2 1.401(5) . ? 
C1 C6 1.410(5) . ? 
C2 C3 1.378(5) . ? 
C2 H2 0.9500 . ? 
C3 C4 1.396(6) . ? 
C3 H3 0.9500 . ? 
C4 C5 1.373(5) . ? 
C4 H4 0.9500 . ? 
C5 C6 1.406(5) . ? 
C5 H5 0.9500 . ? 
C6 C7 1.424(5) . ? 
C7 H7 0.9500 . ? 
C8 C9 1.384(5) . ? 
C8 C13 1.392(5) . ? 
C9 C10 1.394(5) . ? 
C9 H9 0.9500 . ? 
C10 C11 1.384(5) . ? 
C10 H10 0.9500 . ? 
C11 C12 1.392(5) . ? 
C11 C14 1.492(5) . ? 
C12 C13 1.371(5) . ? 
C12 H12 0.9500 . ? 
C13 H13 0.9500 . ? 
C15 C16 1.500(5) . ? 
C15 H15A 0.9900 . ? 
C15 H15B 0.9900 . ? 
C16 C17 1.497(7) . ? 
C16 H16A 0.9900 . ? 
C16 H16B 0.9900 . ? 
C17 C18 1.439(6) . ? 
C17 H17A 0.9900 . ? 
C17 H17B 0.9900 . ? 
C18 H18A 0.9900 . ? 
C18 H18B 0.9900 . ? 
C19 C20 1.498(6) . ? 
C19 H19A 0.9900 . ? 
C19 H19B 0.9900 . ? 
C20 C21 1.482(6) . ? 
C20 H20A 0.9900 . ? 
C20 H20B 0.9900 . ? 
C21 C22 1.482(6) . ? 
C21 H21A 0.9900 . ? 
C21 H21B 0.9900 . ? 
C22 H22A 0.9900 . ? 
C22 H22B 0.9900 . ? 
  
loop_ 
 _geom_angle_atom_site_label_1 
 _geom_angle_atom_site_label_2 
 _geom_angle_atom_site_label_3 
 _geom_angle 
 _geom_angle_site_symmetry_1 
 _geom_angle_site_symmetry_3 
 _geom_angle_publ_flag 
O1 V1 O2 175.02(10) . . ? 
O1 V1 N1 89.11(10) . . ? 
O2 V1 N1 94.85(10) . . ? 
O1 V1 O3 89.30(10) . . ? 
O2 V1 O3 86.78(9) . . ? 
N1 V1 O3 178.19(10) . . ? 
O1 V1 Cl1 91.11(8) . . ? 
O2 V1 Cl1 85.98(7) . . ? 
N1 V1 Cl1 88.69(8) . . ? 
O3 V1 Cl1 92.21(7) . . ? 
O1 V1 Cl2 93.94(8) . . ? 
O2 V1 Cl2 88.88(7) . . ? 
N1 V1 Cl2 92.92(8) . . ? 
O3 V1 Cl2 86.32(7) . . ? 
Cl1 V1 Cl2 174.72(4) . . ? 
C7 N1 C8 116.0(3) . . ? 
C7 N1 V1 122.0(2) . . ? 
C8 N1 V1 121.4(2) . . ? 
C1 O1 V1 129.5(2) . . ? 
C18 O2 C15 108.0(3) . . ? 
C18 O2 V1 124.4(2) . . ? 
C15 O2 V1 127.1(2) . . ? 
C22 O3 C19 108.5(3) . . ? 
C22 O3 V1 125.3(2) . . ? 
C19 O3 V1 119.4(2) . . ? 
O1 C1 C2 118.2(3) . . ? 
O1 C1 C6 122.2(3) . . ? 
C2 C1 C6 119.6(3) . . ? 
C3 C2 C1 120.4(4) . . ? 
C3 C2 H2 119.8 . . ? 
C1 C2 H2 119.8 . . ? 
C2 C3 C4 120.7(4) . . ? 
C2 C3 H3 119.7 . . ? 
C4 C3 H3 119.7 . . ? 
C5 C4 C3 119.3(3) . . ? 
C5 C4 H4 120.3 . . ? 
C3 C4 H4 120.3 . . ? 
C4 C5 C6 121.6(4) . . ? 
C4 C5 H5 119.2 . . ? 
C6 C5 H5 119.2 . . ? 
C5 C6 C1 118.4(3) . . ? 
C5 C6 C7 117.8(3) . . ? 
C1 C6 C7 123.8(3) . . ? 
N1 C7 C6 126.6(3) . . ? 
N1 C7 H7 116.7 . . ? 
C6 C7 H7 116.7 . . ? 
C9 C8 C13 120.0(3) . . ? 
C9 C8 N1 120.3(3) . . ? 
C13 C8 N1 119.6(3) . . ? 
C8 C9 C10 119.7(3) . . ? 
C8 C9 H9 120.2 . . ? 
C10 C9 H9 120.2 . . ? 
C11 C10 C9 120.2(3) . . ? 
C11 C10 H10 119.9 . . ? 
C9 C10 H10 119.9 . . ? 
C10 C11 C12 119.6(3) . . ? 
C10 C11 C14 121.6(3) . . ? 
C12 C11 C14 118.8(3) . . ? 
C13 C12 C11 120.4(3) . . ? 
C13 C12 H12 119.8 . . ? 
C11 C12 H12 119.8 . . ? 
C12 C13 C8 120.1(3) . . ? 
C12 C13 H13 119.9 . . ? 
C8 C13 H13 119.9 . . ? 
F3 C14 F1 107.1(3) . . ? 
F3 C14 F2 105.5(3) . . ? 
F1 C14 F2 106.8(3) . . ? 
F3 C14 C11 112.1(3) . . ? 
F1 C14 C11 113.1(3) . . ? 
F2 C14 C11 111.7(3) . . ? 
O2 C15 C16 104.7(3) . . ? 
O2 C15 H15A 110.8 . . ? 
C16 C15 H15A 110.8 . . ? 
O2 C15 H15B 110.8 . . ? 
C16 C15 H15B 110.8 . . ? 
H15A C15 H15B 108.9 . . ? 
C17 C16 C15 103.2(3) . . ? 
C17 C16 H16A 111.1 . . ? 
C15 C16 H16A 111.1 . . ? 
C17 C16 H16B 111.1 . . ? 
C15 C16 H16B 111.1 . . ? 
H16A C16 H16B 109.1 . . ? 
C18 C17 C16 107.6(4) . . ? 
C18 C17 H17A 110.2 . . ? 
C16 C17 H17A 110.2 . . ? 
C18 C17 H17B 110.2 . . ? 
C16 C17 H17B 110.2 . . ? 
H17A C17 H17B 108.5 . . ? 
C17 C18 O2 107.7(4) . . ? 
C17 C18 H18A 110.2 . . ? 
O2 C18 H18A 110.2 . . ? 
C17 C18 H18B 110.2 . . ? 
O2 C18 H18B 110.2 . . ? 
H18A C18 H18B 108.5 . . ? 
O3 C19 C20 105.0(3) . . ? 
O3 C19 H19A 110.7 . . ? 
C20 C19 H19A 110.7 . . ? 
O3 C19 H19B 110.7 . . ? 
C20 C19 H19B 110.7 . . ? 
H19A C19 H19B 108.8 . . ? 
C21 C20 C19 106.5(4) . . ? 
C21 C20 H20A 110.4 . . ? 
C19 C20 H20A 110.4 . . ? 
C21 C20 H20B 110.4 . . ? 
C19 C20 H20B 110.4 . . ? 
H20A C20 H20B 108.6 . . ? 
C22 C21 C20 102.8(4) . . ? 
C22 C21 H21A 111.2 . . ? 
C20 C21 H21A 111.2 . . ? 
C22 C21 H21B 111.2 . . ? 
C20 C21 H21B 111.2 . . ? 
H21A C21 H21B 109.1 . . ? 
O3 C22 C21 105.8(3) . . ? 
O3 C22 H22A 110.6 . . ? 
C21 C22 H22A 110.6 . . ? 
O3 C22 H22B 110.6 . . ? 
C21 C22 H22B 110.6 . . ? 
H22A C22 H22B 108.7 . . ? 
  
_diffrn_measured_fraction_theta_max    0.973 
_diffrn_reflns_theta_full              25.99 
_diffrn_measured_fraction_theta_full   0.973 
_refine_diff_density_max    0.606 
_refine_diff_density_min   -0.329 
_refine_diff_density_rms    0.069 

 
data_2g
 
_audit_creation_method            SHELXL-97 
_chemical_name_systematic 
; 
 ? 
; 
_chemical_name_common             ? 
_chemical_melting_point           ? 
_chemical_formula_moiety          ? 
_chemical_formula_sum 
 'C25 H34 Cl2 N O3 V' 
_chemical_formula_weight          518.37 
 
loop_ 
 _atom_type_symbol 
 _atom_type_description 
 _atom_type_scat_dispersion_real 
 _atom_type_scat_dispersion_imag 
 _atom_type_scat_source 
 'C'  'C'   0.0033   0.0016 
 'International Tables Vol C Tables 4.2.6.8 and 6.1.1.4' 
 'H'  'H'   0.0000   0.0000 
 'International Tables Vol C Tables 4.2.6.8 and 6.1.1.4' 
 'N'  'N'   0.0061   0.0033 
 'International Tables Vol C Tables 4.2.6.8 and 6.1.1.4' 
 'O'  'O'   0.0106   0.0060 
 'International Tables Vol C Tables 4.2.6.8 and 6.1.1.4' 
 'Cl'  'Cl'   0.1484   0.1585 
 'International Tables Vol C Tables 4.2.6.8 and 6.1.1.4' 
 'V'  'V'   0.3005   0.5294 
 'International Tables Vol C Tables 4.2.6.8 and 6.1.1.4' 
 
_symmetry_cell_setting            Monoclinic 
_symmetry_space_group_name_H-M    P21/c 
 
loop_ 
 _symmetry_equiv_pos_as_xyz 
 'x, y, z' 
 '-x, y+1/2, -z+1/2' 
 '-x, -y, -z' 
 'x, -y-1/2, z-1/2' 
 
_cell_length_a                    7.5894(8) 
_cell_length_b                    13.7589(14) 
_cell_length_c                    24.542(3) 
_cell_angle_alpha                 90.00 
_cell_angle_beta                  96.350(2) 
_cell_angle_gamma                 90.00 
_cell_volume                      2547.0(5) 
_cell_formula_units_Z             4 
_cell_measurement_temperature     187(2) 
_cell_measurement_reflns_used     ? 
_cell_measurement_theta_min       ? 
_cell_measurement_theta_max       ? 
 
_exptl_crystal_description        ? 
_exptl_crystal_colour             ? 
_exptl_crystal_size_max           0.22 
_exptl_crystal_size_mid           0.12 
_exptl_crystal_size_min           0.03 
_exptl_crystal_density_meas       ? 
_exptl_crystal_density_diffrn     1.352 
_exptl_crystal_density_method     'not measured' 
_exptl_crystal_F_000              1088 
_exptl_absorpt_coefficient_mu     0.625 
_exptl_absorpt_correction_type    ? 
_exptl_absorpt_correction_T_min   ? 
_exptl_absorpt_correction_T_max   ? 
_exptl_absorpt_process_details    ? 
 
_exptl_special_details 
; 
 ? 
; 
 
_diffrn_ambient_temperature       187(2) 
_diffrn_radiation_wavelength      0.71073 
_diffrn_radiation_type            MoK\a 
_diffrn_radiation_source          'fine-focus sealed tube' 
_diffrn_radiation_monochromator   graphite 
_diffrn_measurement_device_type   ? 
_diffrn_measurement_method        ? 
_diffrn_detector_area_resol_mean  ? 
_diffrn_standards_number          ? 
_diffrn_standards_interval_count  ? 
_diffrn_standards_interval_time   ? 
_diffrn_standards_decay_%         ? 
_diffrn_reflns_number             14127 
_diffrn_reflns_av_R_equivalents   0.1164 
_diffrn_reflns_av_sigmaI/netI     0.2019 
_diffrn_reflns_limit_h_min        -9 
_diffrn_reflns_limit_h_max        9 
_diffrn_reflns_limit_k_min        -16 
_diffrn_reflns_limit_k_max        15 
_diffrn_reflns_limit_l_min        -18 
_diffrn_reflns_limit_l_max        30 
_diffrn_reflns_theta_min          1.67 
_diffrn_reflns_theta_max          26.04 
_reflns_number_total              5022 
_reflns_number_gt                 2096 
_reflns_threshold_expression      >2sigma(I) 
 
_computing_data_collection        ? 
_computing_cell_refinement        ? 
_computing_data_reduction         ? 
_computing_structure_solution     'SHELXS-97 (Sheldrick, 1990)' 
_computing_structure_refinement   'SHELXL-97 (Sheldrick, 1997)' 
_computing_molecular_graphics     ? 
_computing_publication_material   ? 
 
_refine_special_details 
; 
 Refinement of F^2^ against ALL reflections.  The weighted R-factor wR and 
 goodness of fit S are based on F^2^, conventional R-factors R are based 
 on F, with F set to zero for negative F^2^. The threshold expression of 
 F^2^ > 2sigma(F^2^) is used only for calculating R-factors(gt) etc. and is 
 not relevant to the choice of reflections for refinement.  R-factors based 
 on F^2^ are statistically about twice as large as those based on F, and R- 
 factors based on ALL data will be even larger. 
; 
 
_refine_ls_structure_factor_coef  Fsqd  
_refine_ls_matrix_type            full 
_refine_ls_weighting_scheme       calc  
_refine_ls_weighting_details 
 'calc w=1/[\s^2^(Fo^2^)+(0.0000P)^2^+0.0000P] where P=(Fo^2^+2Fc^2^)/3' 
_atom_sites_solution_primary      direct 
_atom_sites_solution_secondary    difmap 
_atom_sites_solution_hydrogens    geom 
_refine_ls_hydrogen_treatment     mixed 
_refine_ls_extinction_method      none 
_refine_ls_extinction_coef        ? 
_refine_ls_number_reflns          5022 
_refine_ls_number_parameters      132 
_refine_ls_number_restraints      0 
_refine_ls_R_factor_all           0.1686 
_refine_ls_R_factor_gt            0.0704 
_refine_ls_wR_factor_ref          0.1016 
_refine_ls_wR_factor_gt           0.0859 
_refine_ls_goodness_of_fit_ref    0.921 
_refine_ls_restrained_S_all       0.921 
_refine_ls_shift/su_max           0.001 
_refine_ls_shift/su_mean          0.000 
 
loop_ 
 _atom_site_label 
 _atom_site_type_symbol 
 _atom_site_fract_x 
 _atom_site_fract_y 
 _atom_site_fract_z 
 _atom_site_U_iso_or_equiv 
 _atom_site_adp_type 
 _atom_site_occupancy 
 _atom_site_symmetry_multiplicity 
 _atom_site_calc_flag 
 _atom_site_refinement_flags 
 _atom_site_disorder_assembly 
 _atom_site_disorder_group 
V V 0.38175(12) 0.74018(6) 0.43138(4) 0.0272(3) Uiso 1 1 d . . . 
Cl1 Cl 0.52103(17) 0.88858(9) 0.41281(6) 0.0356(4) Uiso 1 1 d . . . 
Cl2 Cl 0.22579(17) 0.60137(10) 0.45442(6) 0.0376(4) Uiso 1 1 d . . . 
O1 O 0.4537(4) 0.6792(2) 0.36995(13) 0.0287(9) Uiso 1 1 d . . . 
O2 O 0.2787(4) 0.8085(2) 0.49728(14) 0.0308(10) Uiso 1 1 d . . . 
O3 O 0.1532(4) 0.7930(2) 0.38266(14) 0.0339(10) Uiso 1 1 d . . . 
N N 0.6083(5) 0.6868(3) 0.47858(17) 0.0266(11) Uiso 1 1 d . . . 
C1 C 0.5526(6) 0.6005(4) 0.3650(2) 0.0267(13) Uiso 1 1 d . . . 
C2 C 0.5370(7) 0.5503(4) 0.3136(2) 0.0327(15) Uiso 1 1 d . . . 
C3 C 0.6504(7) 0.4712(4) 0.3101(2) 0.0428(16) Uiso 1 1 d . . . 
H3 H 0.6417 0.4356 0.2768 0.051 Uiso 1 1 calc R . . 
C4 C 0.7734(7) 0.4420(4) 0.3520(2) 0.0434(17) Uiso 1 1 d . . . 
H4 H 0.8486 0.3884 0.3466 0.052 Uiso 1 1 calc R . . 
C5 C 0.7892(7) 0.4890(4) 0.4012(2) 0.0347(15) Uiso 1 1 d . . . 
H5 H 0.8747 0.4686 0.4301 0.042 Uiso 1 1 calc R . . 
C6 C 0.6759(6) 0.5686(3) 0.4084(2) 0.0264(14) Uiso 1 1 d . . . 
C7 C 0.7000(6) 0.6156(3) 0.4608(2) 0.0280(14) Uiso 1 1 d . . . 
H7 H 0.7949 0.5919 0.4857 0.034 Uiso 1 1 calc R . . 
C8 C 0.6615(6) 0.7186(3) 0.5337(2) 0.0269(14) Uiso 1 1 d . . . 
C9 C 0.6871(6) 0.6531(4) 0.5763(2) 0.0384(16) Uiso 1 1 d . . . 
H9 H 0.6707 0.5856 0.5695 0.046 Uiso 1 1 calc R . . 
C10 C 0.7369(7) 0.6861(4) 0.6292(2) 0.0464(17) Uiso 1 1 d . . . 
H10 H 0.7570 0.6405 0.6583 0.056 Uiso 1 1 calc R . . 
C11 C 0.7576(7) 0.7840(4) 0.6402(2) 0.0445(17) Uiso 1 1 d . . . 
H11 H 0.7917 0.8060 0.6765 0.053 Uiso 1 1 calc R . . 
C12 C 0.7278(6) 0.8501(4) 0.5971(2) 0.0377(16) Uiso 1 1 d . . . 
H12 H 0.7395 0.9179 0.6040 0.045 Uiso 1 1 calc R . . 
C13 C 0.6816(6) 0.8175(4) 0.5448(2) 0.0332(15) Uiso 1 1 d . . . 
H13 H 0.6629 0.8630 0.5157 0.040 Uiso 1 1 calc R . . 
C14 C 0.3985(7) 0.5809(4) 0.2663(2) 0.0401(16) Uiso 1 1 d . . . 
C15 C 0.2127(6) 0.5764(4) 0.2837(2) 0.0451(17) Uiso 1 1 d . . . 
H15A H 0.1847 0.5092 0.2927 0.068 Uiso 1 1 calc R . . 
H15B H 0.1273 0.5994 0.2536 0.068 Uiso 1 1 calc R . . 
H15C H 0.2063 0.6178 0.3159 0.068 Uiso 1 1 calc R . . 
C16 C 0.4377(7) 0.6847(4) 0.2481(2) 0.0527(18) Uiso 1 1 d . . . 
H16A H 0.3488 0.7041 0.2180 0.079 Uiso 1 1 calc R . . 
H16B H 0.5559 0.6869 0.2356 0.079 Uiso 1 1 calc R . . 
H16C H 0.4333 0.7294 0.2790 0.079 Uiso 1 1 calc R . . 
C17 C 0.4040(7) 0.5139(4) 0.2162(2) 0.060(2) Uiso 1 1 d . . . 
H17A H 0.3792 0.4468 0.2265 0.090 Uiso 1 1 calc R . . 
H17B H 0.5218 0.5171 0.2035 0.090 Uiso 1 1 calc R . . 
H17C H 0.3146 0.5350 0.1867 0.090 Uiso 1 1 calc R . . 
C18 C 0.2284(6) 0.7610(4) 0.5469(2) 0.0356(15) Uiso 1 1 d . . . 
H18A H 0.3195 0.7133 0.5613 0.043 Uiso 1 1 calc R . . 
H18B H 0.1132 0.7272 0.5392 0.043 Uiso 1 1 calc R . . 
C19 C 0.2155(7) 0.8423(4) 0.5869(2) 0.0442(17) Uiso 1 1 d . . . 
H19A H 0.3330 0.8586 0.6063 0.053 Uiso 1 1 calc R . . 
H19B H 0.1331 0.8259 0.6141 0.053 Uiso 1 1 calc R . . 
C20 C 0.1442(7) 0.9243(4) 0.5501(2) 0.0456(17) Uiso 1 1 d . . . 
H20A H 0.0144 0.9185 0.5406 0.055 Uiso 1 1 calc R . . 
H20B H 0.1713 0.9882 0.5676 0.055 Uiso 1 1 calc R . . 
C21 C 0.2406(7) 0.9115(4) 0.5004(2) 0.0433(17) Uiso 1 1 d . . . 
H21A H 0.1658 0.9332 0.4670 0.052 Uiso 1 1 calc R . . 
H21B H 0.3518 0.9497 0.5041 0.052 Uiso 1 1 calc R . . 
C22 C 0.1524(7) 0.8523(4) 0.3339(2) 0.0469(17) Uiso 1 1 d . . . 
H22A H 0.2573 0.8374 0.3147 0.056 Uiso 1 1 calc R . . 
H22B H 0.1552 0.9221 0.3437 0.056 Uiso 1 1 calc R . . 
C23 C -0.0111(8) 0.8291(5) 0.2987(3) 0.076(2) Uiso 1 1 d . . . 
H23A H 0.0152 0.7882 0.2674 0.091 Uiso 1 1 calc R . . 
H23B H -0.0703 0.8894 0.2842 0.091 Uiso 1 1 calc R . . 
C24 C -0.1260(8) 0.7757(4) 0.3337(3) 0.072(2) Uiso 1 1 d . . . 
H24A H -0.2394 0.8108 0.3350 0.086 Uiso 1 1 calc R . . 
H24B H -0.1523 0.7098 0.3188 0.086 Uiso 1 1 calc R . . 
C25 C -0.0319(7) 0.7693(4) 0.3881(2) 0.0562(18) Uiso 1 1 d . . . 
H25A H -0.0817 0.8158 0.4132 0.067 Uiso 1 1 calc R . . 
H25B H -0.0413 0.7029 0.4030 0.067 Uiso 1 1 calc R . . 
 
_geom_special_details 
; 
 All esds (except the esd in the dihedral angle between two l.s. planes) 
 are estimated using the full covariance matrix.  The cell esds are taken 
 into account individually in the estimation of esds in distances, angles 
 and torsion angles; correlations between esds in cell parameters are only 
 used when they are defined by crystal symmetry.  An approximate (isotropic) 
 treatment of cell esds is used for estimating esds involving l.s. planes. 
; 
 
loop_ 
 _geom_bond_atom_site_label_1 
 _geom_bond_atom_site_label_2 
 _geom_bond_distance 
 _geom_bond_site_symmetry_2 
 _geom_bond_publ_flag 
V O1 1.859(3) . ? 
V O2 2.095(3) . ? 
V N 2.097(4) . ? 
V O3 2.123(3) . ? 
V Cl2 2.3487(17) . ? 
V Cl1 2.3667(16) . ? 
O1 C1 1.330(5) . ? 
O2 C21 1.450(5) . ? 
O2 C18 1.469(5) . ? 
O3 C22 1.448(5) . ? 
O3 C25 1.463(6) . ? 
N C7 1.306(5) . ? 
N C8 1.437(6) . ? 
C1 C6 1.409(6) . ? 
C1 C2 1.432(6) . ? 
C2 C3 1.396(6) . ? 
C2 C14 1.535(6) . ? 
C3 C4 1.370(6) . ? 
C4 C5 1.364(6) . ? 
C5 C6 1.416(6) . ? 
C6 C7 1.431(6) . ? 
C8 C9 1.378(6) . ? 
C8 C13 1.393(6) . ? 
C9 C10 1.387(6) . ? 
C10 C11 1.379(6) . ? 
C11 C12 1.395(6) . ? 
C12 C13 1.367(6) . ? 
C14 C15 1.518(6) . ? 
C14 C17 1.542(7) . ? 
C14 C16 1.536(6) . ? 
C18 C19 1.498(6) . ? 
C19 C20 1.508(6) . ? 
C20 C21 1.500(7) . ? 
C22 C23 1.467(6) . ? 
C23 C24 1.485(7) . ? 
C24 C25 1.446(7) . ? 
 
loop_ 
 _geom_angle_atom_site_label_1 
 _geom_angle_atom_site_label_2 
 _geom_angle_atom_site_label_3 
 _geom_angle 
 _geom_angle_site_symmetry_1 
 _geom_angle_site_symmetry_3 
 _geom_angle_publ_flag 
O1 V O2 175.16(14) . . ? 
O1 V N 89.63(16) . . ? 
O2 V N 94.80(15) . . ? 
O1 V O3 89.59(14) . . ? 
O2 V O3 85.97(13) . . ? 
N V O3 179.22(17) . . ? 
O1 V Cl2 91.69(11) . . ? 
O2 V Cl2 86.44(10) . . ? 
N V Cl2 89.23(12) . . ? 
O3 V Cl2 90.69(10) . . ? 
O1 V Cl1 93.18(11) . . ? 
O2 V Cl1 88.53(10) . . ? 
N V Cl1 92.98(12) . . ? 
O3 V Cl1 87.16(10) . . ? 
Cl2 V Cl1 174.66(7) . . ? 
C1 O1 V 131.3(3) . . ? 
C21 O2 C18 108.6(4) . . ? 
C21 O2 V 124.9(3) . . ? 
C18 O2 V 126.4(3) . . ? 
C22 O3 C25 106.6(4) . . ? 
C22 O3 V 125.9(3) . . ? 
C25 O3 V 127.2(3) . . ? 
C7 N C8 116.1(4) . . ? 
C7 N V 120.9(3) . . ? 
C8 N V 122.8(3) . . ? 
O1 C1 C6 121.3(5) . . ? 
O1 C1 C2 118.7(5) . . ? 
C6 C1 C2 120.0(5) . . ? 
C3 C2 C1 116.0(5) . . ? 
C3 C2 C14 122.8(5) . . ? 
C1 C2 C14 121.1(5) . . ? 
C4 C3 C2 123.8(6) . . ? 
C5 C4 C3 120.7(5) . . ? 
C4 C5 C6 118.9(5) . . ? 
C5 C6 C1 120.5(5) . . ? 
C5 C6 C7 116.3(5) . . ? 
C1 C6 C7 123.1(5) . . ? 
N C7 C6 128.3(5) . . ? 
C9 C8 C13 119.1(5) . . ? 
C9 C8 N 121.2(5) . . ? 
C13 C8 N 119.7(5) . . ? 
C8 C9 C10 119.8(5) . . ? 
C11 C10 C9 121.1(6) . . ? 
C10 C11 C12 118.9(6) . . ? 
C13 C12 C11 120.0(5) . . ? 
C12 C13 C8 121.1(5) . . ? 
C15 C14 C2 110.9(5) . . ? 
C15 C14 C17 107.9(4) . . ? 
C2 C14 C17 111.3(4) . . ? 
C15 C14 C16 109.6(5) . . ? 
C2 C14 C16 109.7(4) . . ? 
C17 C14 C16 107.5(5) . . ? 
O2 C18 C19 104.6(4) . . ? 
C18 C19 C20 102.2(4) . . ? 
C21 C20 C19 102.9(4) . . ? 
O2 C21 C20 106.0(4) . . ? 
O3 C22 C23 106.9(5) . . ? 
C22 C23 C24 106.2(5) . . ? 
C25 C24 C23 107.7(5) . . ? 
O3 C25 C24 106.4(5) . . ? 
 
_diffrn_measured_fraction_theta_max    0.998 
_diffrn_reflns_theta_full              26.04 
_diffrn_measured_fraction_theta_full   0.998 
_refine_diff_density_max    0.632 
_refine_diff_density_min   -1.016 
_refine_diff_density_rms    0.086 


  
data_2i 
  
_audit_creation_method            SHELXL-97 
_chemical_name_systematic 
; 
 ? 
; 
_chemical_name_common             ? 
_chemical_melting_point           ? 
_chemical_formula_moiety          ? 
_chemical_formula_sum 
 'C29 H42 Cl2 N O3 V' 
_chemical_formula_weight          574.48 
  
loop_ 
 _atom_type_symbol 
 _atom_type_description 
 _atom_type_scat_dispersion_real 
 _atom_type_scat_dispersion_imag 
 _atom_type_scat_source 
 'C'  'C'   0.0033   0.0016 
 'International Tables Vol C Tables 4.2.6.8 and 6.1.1.4' 
 'H'  'H'   0.0000   0.0000 
 'International Tables Vol C Tables 4.2.6.8 and 6.1.1.4' 
 'N'  'N'   0.0061   0.0033 
 'International Tables Vol C Tables 4.2.6.8 and 6.1.1.4' 
 'O'  'O'   0.0106   0.0060 
 'International Tables Vol C Tables 4.2.6.8 and 6.1.1.4' 
 'V'  'V'   0.3005   0.5294 
 'International Tables Vol C Tables 4.2.6.8 and 6.1.1.4' 
 'Cl'  'Cl'   0.1484   0.1585 
 'International Tables Vol C Tables 4.2.6.8 and 6.1.1.4' 
  
_symmetry_cell_setting            Monoclinic 
_symmetry_space_group_name_H-M    P2(1)/c 
  
loop_ 
 _symmetry_equiv_pos_as_xyz 
 'x, y, z' 
 '-x, y+1/2, -z+1/2' 
 '-x, -y, -z' 
 'x, -y-1/2, z-1/2' 
  
_cell_length_a                    10.7986(13) 
_cell_length_b                    21.683(3) 
_cell_length_c                    12.8415(15) 
_cell_angle_alpha                 90.00 
_cell_angle_beta                  91.601(2) 
_cell_angle_gamma                 90.00 
_cell_volume                      3005.6(6) 
_cell_formula_units_Z             4 
_cell_measurement_temperature     187(2) 
_cell_measurement_reflns_used     997 
_cell_measurement_theta_min       2.46 
_cell_measurement_theta_max       19.22 
  
_exptl_crystal_description        ? 
_exptl_crystal_colour             ? 
_exptl_crystal_size_max           0.25 
_exptl_crystal_size_mid           0.09 
_exptl_crystal_size_min           0.04 
_exptl_crystal_density_meas       ? 
_exptl_crystal_density_diffrn     1.270 
_exptl_crystal_density_method     'not measured' 
_exptl_crystal_F_000              1216 
_exptl_absorpt_coefficient_mu     0.537 
_exptl_absorpt_correction_type    multi-scan 
_exptl_absorpt_correction_T_min   0.8793 
_exptl_absorpt_correction_T_max   0.9773 
_exptl_absorpt_process_details    ? 
  
_exptl_special_details 
; 
 ? 
; 
  
_diffrn_ambient_temperature       187(2) 
_diffrn_radiation_wavelength      0.71073 
_diffrn_radiation_type            MoK\a 
_diffrn_radiation_source          'fine-focus sealed tube' 
_diffrn_radiation_monochromator   graphite 
_diffrn_measurement_device_type   'CCD area detector' 
_diffrn_measurement_method        'phi and omega scans' 
_diffrn_detector_area_resol_mean  ? 
_diffrn_standards_number          ? 
_diffrn_standards_interval_count  ? 
_diffrn_standards_interval_time   ? 
_diffrn_standards_decay_%         ? 
_diffrn_reflns_number             15534 
_diffrn_reflns_av_R_equivalents   0.0989 
_diffrn_reflns_av_sigmaI/netI     0.1202 
_diffrn_reflns_limit_h_min        -12 
_diffrn_reflns_limit_h_max        11 
_diffrn_reflns_limit_k_min        -25 
_diffrn_reflns_limit_k_max        24 
_diffrn_reflns_limit_l_min        -13 
_diffrn_reflns_limit_l_max        15 
_diffrn_reflns_theta_min          1.84 
_diffrn_reflns_theta_max          25.03 
_reflns_number_total              5294 
_reflns_number_gt                 3164 
_reflns_threshold_expression      >2sigma(I) 
  
_computing_data_collection        'Bruker SMART' 
_computing_cell_refinement        'Bruker SMART' 
_computing_data_reduction         'Bruker SAINT' 
_computing_structure_solution     'SHELXS-97 (Sheldrick, 1990)' 
_computing_structure_refinement   'SHELXL-97 (Sheldrick, 1997)' 
_computing_molecular_graphics     'Bruker SHELXTL' 
_computing_publication_material   'Bruker SHELXTL' 
  
_refine_special_details 
; 
 Refinement of F^2^ against ALL reflections.  The weighted R-factor wR and 
 goodness of fit S are based on F^2^, conventional R-factors R are based 
 on F, with F set to zero for negative F^2^. The threshold expression of 
 F^2^ > 2sigma(F^2^) is used only for calculating R-factors(gt) etc. and is 
 not relevant to the choice of reflections for refinement.  R-factors based 
 on F^2^ are statistically about twice as large as those based on F, and R- 
 factors based on ALL data will be even larger. 
; 
  
_refine_ls_structure_factor_coef  Fsqd 
_refine_ls_matrix_type            full 
_refine_ls_weighting_scheme       calc 
_refine_ls_weighting_details 
 'calc w=1/[\s^2^(Fo^2^)+(0.0382P)^2^+0.0000P] where P=(Fo^2^+2Fc^2^)/3' 
_atom_sites_solution_primary      direct 
_atom_sites_solution_secondary    difmap 
_atom_sites_solution_hydrogens    geom 
_refine_ls_hydrogen_treatment     constr 
_refine_ls_extinction_method      none 
_refine_ls_extinction_coef        ? 
_refine_ls_number_reflns          5294 
_refine_ls_number_parameters      331 
_refine_ls_number_restraints      0 
_refine_ls_R_factor_all           0.1242 
_refine_ls_R_factor_gt            0.0649 
_refine_ls_wR_factor_ref          0.1259 
_refine_ls_wR_factor_gt           0.1057 
_refine_ls_goodness_of_fit_ref    0.988 
_refine_ls_restrained_S_all       0.988 
_refine_ls_shift/su_max           0.001 
_refine_ls_shift/su_mean          0.000 
  
loop_ 
 _atom_site_label 
 _atom_site_type_symbol 
 _atom_site_fract_x 
 _atom_site_fract_y 
 _atom_site_fract_z 
 _atom_site_U_iso_or_equiv 
 _atom_site_adp_type 
 _atom_site_occupancy 
 _atom_site_symmetry_multiplicity 
 _atom_site_calc_flag 
 _atom_site_refinement_flags 
 _atom_site_disorder_assembly 
 _atom_site_disorder_group 
Cl1 Cl 0.26089(11) 0.47665(5) 0.06364(9) 0.0397(3) Uani 1 1 d . . . 
Cl2 Cl 0.23967(11) 0.59253(5) 0.36995(9) 0.0350(3) Uani 1 1 d . . . 
N1 N 0.0629(3) 0.54311(15) 0.1893(3) 0.0237(8) Uani 1 1 d . . . 
O1 O 0.2607(3) 0.61442(12) 0.1325(2) 0.0285(7) Uani 1 1 d . . . 
O2 O 0.2743(3) 0.45896(13) 0.3012(2) 0.0329(8) Uani 1 1 d . . . 
O3 O 0.4495(3) 0.54456(13) 0.2249(2) 0.0310(8) Uani 1 1 d . . . 
V1 V 0.25373(7) 0.54220(3) 0.20933(6) 0.0238(2) Uani 1 1 d . . . 
C1 C -0.0088(4) 0.49472(19) 0.2359(3) 0.0220(10) Uani 1 1 d . . . 
C2 C -0.0514(4) 0.4461(2) 0.1758(4) 0.0329(12) Uani 1 1 d . . . 
H2 H -0.0367 0.4453 0.1032 0.040 Uiso 1 1 calc R . . 
C3 C -0.1156(4) 0.3986(2) 0.2211(4) 0.0433(14) Uani 1 1 d . . . 
H3 H -0.1443 0.3650 0.1795 0.052 Uiso 1 1 calc R . . 
C4 C -0.1382(4) 0.3995(2) 0.3251(4) 0.0416(14) Uani 1 1 d . . . 
H4 H -0.1819 0.3665 0.3558 0.050 Uiso 1 1 calc R . . 
C5 C -0.0976(4) 0.4486(2) 0.3859(4) 0.0409(13) Uani 1 1 d . . . 
H5 H -0.1143 0.4494 0.4581 0.049 Uiso 1 1 calc R . . 
C6 C -0.0326(4) 0.4963(2) 0.3414(3) 0.0306(11) Uani 1 1 d . . . 
H6 H -0.0043 0.5300 0.3830 0.037 Uiso 1 1 calc R . . 
C7 C 0.0017(4) 0.58231(19) 0.1313(3) 0.0249(10) Uani 1 1 d . . . 
H7 H -0.0854 0.5767 0.1252 0.030 Uiso 1 1 calc R . . 
C8 C 0.0527(4) 0.63331(18) 0.0753(3) 0.0222(10) Uani 1 1 d . . . 
C9 C -0.0328(4) 0.67075(19) 0.0197(3) 0.0254(10) Uani 1 1 d . . . 
H9 H -0.1185 0.6610 0.0205 0.030 Uiso 1 1 calc R . . 
C10 C 0.0057(4) 0.72128(18) -0.0359(3) 0.0255(11) Uani 1 1 d . . . 
C11 C 0.1329(4) 0.73247(19) -0.0375(3) 0.0257(10) Uani 1 1 d . . . 
H11 H 0.1606 0.7669 -0.0763 0.031 Uiso 1 1 calc R . . 
C12 C 0.2214(4) 0.69660(18) 0.0140(3) 0.0233(10) Uani 1 1 d . . . 
C13 C 0.1795(4) 0.64724(18) 0.0754(3) 0.0224(10) Uani 1 1 d . . . 
C14 C -0.0853(4) 0.76421(19) -0.0956(4) 0.0301(11) Uani 1 1 d . . . 
C15 C -0.2198(4) 0.7455(2) -0.0818(4) 0.0415(13) Uani 1 1 d . . . 
H15A H -0.2742 0.7736 -0.1216 0.062 Uiso 1 1 calc R . . 
H15B H -0.2395 0.7476 -0.0079 0.062 Uiso 1 1 calc R . . 
H15C H -0.2323 0.7032 -0.1071 0.062 Uiso 1 1 calc R . . 
C16 C -0.0576(5) 0.7630(2) -0.2120(4) 0.0552(16) Uani 1 1 d . . . 
H16A H -0.0635 0.7206 -0.2378 0.083 Uiso 1 1 calc R . . 
H16B H 0.0262 0.7788 -0.2224 0.083 Uiso 1 1 calc R . . 
H16C H -0.1178 0.7889 -0.2502 0.083 Uiso 1 1 calc R . . 
C17 C -0.0688(4) 0.8299(2) -0.0522(4) 0.0506(15) Uani 1 1 d . . . 
H17A H -0.1277 0.8577 -0.0877 0.076 Uiso 1 1 calc R . . 
H17B H 0.0159 0.8441 -0.0638 0.076 Uiso 1 1 calc R . . 
H17C H -0.0841 0.8299 0.0227 0.076 Uiso 1 1 calc R . . 
C18 C 0.3609(4) 0.7097(2) 0.0050(4) 0.0321(12) Uani 1 1 d . . . 
C19 C 0.4290(4) 0.6511(2) -0.0293(4) 0.0453(14) Uani 1 1 d . . . 
H19A H 0.5176 0.6599 -0.0345 0.068 Uiso 1 1 calc R . . 
H19B H 0.3956 0.6377 -0.0973 0.068 Uiso 1 1 calc R . . 
H19C H 0.4171 0.6184 0.0221 0.068 Uiso 1 1 calc R . . 
C20 C 0.4125(5) 0.7328(2) 0.1108(4) 0.0566(16) Uani 1 1 d . . . 
H20A H 0.3779 0.7736 0.1255 0.085 Uiso 1 1 calc R . . 
H20B H 0.5029 0.7356 0.1087 0.085 Uiso 1 1 calc R . . 
H20C H 0.3894 0.7038 0.1656 0.085 Uiso 1 1 calc R . . 
C21 C 0.3877(4) 0.7596(2) -0.0763(4) 0.0589(17) Uani 1 1 d . . . 
H21A H 0.3523 0.7990 -0.0542 0.088 Uiso 1 1 calc R . . 
H21B H 0.3505 0.7476 -0.1438 0.088 Uiso 1 1 calc R . . 
H21C H 0.4775 0.7641 -0.0828 0.088 Uiso 1 1 calc R . . 
C22 C 0.2275(4) 0.39758(19) 0.2809(4) 0.0404(13) Uani 1 1 d . . . 
H22A H 0.2072 0.3919 0.2058 0.049 Uiso 1 1 calc R . . 
H22B H 0.1523 0.3895 0.3211 0.049 Uiso 1 1 calc R . . 
C23 C 0.3312(5) 0.3558(2) 0.3153(4) 0.0504(15) Uani 1 1 d . . . 
H23A H 0.3909 0.3499 0.2591 0.060 Uiso 1 1 calc R . . 
H23B H 0.2993 0.3151 0.3368 0.060 Uiso 1 1 calc R . . 
C24 C 0.3900(5) 0.3895(2) 0.4064(4) 0.0621(18) Uani 1 1 d . . . 
H24A H 0.3647 0.3708 0.4729 0.074 Uiso 1 1 calc R . . 
H24B H 0.4814 0.3879 0.4032 0.074 Uiso 1 1 calc R . . 
C25 C 0.3453(5) 0.4548(2) 0.3984(4) 0.0569(17) Uani 1 1 d . . . 
H25A H 0.2927 0.4650 0.4580 0.068 Uiso 1 1 calc R . . 
H25B H 0.4163 0.4837 0.3983 0.068 Uiso 1 1 calc R . . 
C26 C 0.5341(4) 0.5035(2) 0.1730(4) 0.0487(14) Uani 1 1 d . . . 
H26A H 0.5269 0.5086 0.0964 0.058 Uiso 1 1 calc R . . 
H26B H 0.5166 0.4599 0.1905 0.058 Uiso 1 1 calc R . . 
C27 C 0.6596(5) 0.5218(3) 0.2125(5) 0.0678(18) Uani 1 1 d . . . 
H27A H 0.6829 0.4988 0.2768 0.081 Uiso 1 1 calc R . . 
H27B H 0.7227 0.5142 0.1595 0.081 Uiso 1 1 calc R . . 
C28 C 0.6475(5) 0.5876(3) 0.2338(6) 0.084(2) Uani 1 1 d . . . 
H28A H 0.6562 0.6121 0.1695 0.100 Uiso 1 1 calc R . . 
H28B H 0.7107 0.6013 0.2862 0.100 Uiso 1 1 calc R . . 
C29 C 0.5205(4) 0.5935(2) 0.2747(4) 0.0493(15) Uani 1 1 d . . . 
H29A H 0.5219 0.5886 0.3514 0.059 Uiso 1 1 calc R . . 
H29B H 0.4847 0.6343 0.2568 0.059 Uiso 1 1 calc R . . 
  
loop_ 
 _atom_site_aniso_label 
 _atom_site_aniso_U_11 
 _atom_site_aniso_U_22 
 _atom_site_aniso_U_33 
 _atom_site_aniso_U_23 
 _atom_site_aniso_U_13 
 _atom_site_aniso_U_12 
Cl1 0.0358(8) 0.0531(8) 0.0302(7) -0.0107(6) 0.0032(5) -0.0017(6) 
Cl2 0.0375(7) 0.0328(7) 0.0349(7) -0.0069(6) 0.0071(5) -0.0028(6) 
N1 0.023(2) 0.026(2) 0.022(2) 0.0030(18) -0.0004(16) -0.0006(17) 
O1 0.0203(17) 0.0323(18) 0.0330(18) 0.0095(15) 0.0008(13) -0.0013(14) 
O2 0.040(2) 0.0250(17) 0.0329(19) 0.0036(15) -0.0081(15) -0.0006(15) 
O3 0.0222(18) 0.0298(17) 0.041(2) -0.0042(16) 0.0002(14) -0.0007(15) 
V1 0.0218(4) 0.0248(4) 0.0247(4) 0.0026(4) 0.0013(3) 0.0014(3) 
C1 0.014(2) 0.022(2) 0.029(3) 0.004(2) 0.0002(19) 0.0009(19) 
C2 0.032(3) 0.035(3) 0.032(3) -0.006(2) 0.004(2) -0.004(2) 
C3 0.040(3) 0.037(3) 0.054(4) -0.011(3) 0.005(3) -0.009(3) 
C4 0.034(3) 0.029(3) 0.062(4) 0.012(3) -0.001(3) -0.015(2) 
C5 0.041(3) 0.052(3) 0.030(3) 0.016(3) 0.004(2) -0.005(3) 
C6 0.032(3) 0.034(3) 0.026(3) 0.003(2) 0.001(2) -0.003(2) 
C7 0.018(2) 0.033(3) 0.023(3) -0.004(2) -0.0017(19) -0.002(2) 
C8 0.020(3) 0.023(2) 0.024(2) 0.003(2) 0.0039(19) 0.000(2) 
C9 0.017(2) 0.030(3) 0.029(3) -0.002(2) 0.0039(19) -0.004(2) 
C10 0.027(3) 0.023(2) 0.026(3) -0.006(2) -0.001(2) 0.003(2) 
C11 0.024(3) 0.021(2) 0.032(3) 0.004(2) 0.002(2) -0.001(2) 
C12 0.020(3) 0.026(2) 0.025(3) 0.001(2) 0.0043(19) 0.001(2) 
C13 0.023(3) 0.021(2) 0.023(2) -0.001(2) -0.0030(19) 0.004(2) 
C14 0.023(3) 0.026(3) 0.041(3) 0.002(2) -0.003(2) 0.000(2) 
C15 0.036(3) 0.036(3) 0.052(3) 0.011(3) -0.005(2) 0.005(2) 
C16 0.051(4) 0.068(4) 0.047(4) 0.024(3) -0.005(3) 0.009(3) 
C17 0.032(3) 0.032(3) 0.088(4) 0.004(3) -0.006(3) 0.003(2) 
C18 0.027(3) 0.027(3) 0.042(3) 0.011(2) 0.004(2) -0.002(2) 
C19 0.028(3) 0.048(3) 0.061(4) 0.009(3) 0.014(3) 0.009(2) 
C20 0.037(3) 0.049(3) 0.082(4) -0.001(3) -0.011(3) -0.008(3) 
C21 0.030(3) 0.056(4) 0.091(5) 0.037(3) 0.011(3) -0.003(3) 
C22 0.047(3) 0.031(3) 0.044(3) 0.000(3) 0.000(3) -0.001(2) 
C23 0.055(4) 0.031(3) 0.064(4) 0.003(3) -0.007(3) 0.007(3) 
C24 0.070(4) 0.044(3) 0.071(4) 0.012(3) -0.026(3) 0.010(3) 
C25 0.088(5) 0.039(3) 0.041(3) -0.001(3) -0.023(3) 0.010(3) 
C26 0.026(3) 0.061(4) 0.059(4) -0.014(3) 0.006(3) 0.015(3) 
C27 0.032(4) 0.095(5) 0.076(5) -0.024(4) -0.002(3) 0.022(3) 
C28 0.026(4) 0.093(5) 0.131(6) -0.018(5) 0.000(4) -0.022(4) 
C29 0.035(3) 0.043(3) 0.070(4) -0.009(3) -0.007(3) -0.004(3) 
  
_geom_special_details 
; 
 All esds (except the esd in the dihedral angle between two l.s. planes) 
 are estimated using the full covariance matrix.  The cell esds are taken 
 into account individually in the estimation of esds in distances, angles 
 and torsion angles; correlations between esds in cell parameters are only 
 used when they are defined by crystal symmetry.  An approximate (isotropic) 
 treatment of cell esds is used for estimating esds involving l.s. planes. 
; 
  
loop_ 
 _geom_bond_atom_site_label_1 
 _geom_bond_atom_site_label_2 
 _geom_bond_distance 
 _geom_bond_site_symmetry_2 
 _geom_bond_publ_flag 
Cl1 V1 2.3527(14) . ? 
Cl2 V1 2.3421(14) . ? 
N1 C7 1.299(5) . ? 
N1 C1 1.444(5) . ? 
N1 V1 2.069(3) . ? 
O1 C13 1.333(4) . ? 
O1 V1 1.853(3) . ? 
O2 C22 1.445(5) . ? 
O2 C25 1.450(5) . ? 
O2 V1 2.164(3) . ? 
O3 C29 1.448(5) . ? 
O3 C26 1.451(5) . ? 
O3 V1 2.119(3) . ? 
C1 C2 1.378(5) . ? 
C1 C6 1.387(6) . ? 
C2 C3 1.379(6) . ? 
C2 H2 0.9500 . ? 
C3 C4 1.365(6) . ? 
C3 H3 0.9500 . ? 
C4 C5 1.383(6) . ? 
C4 H4 0.9500 . ? 
C5 C6 1.383(6) . ? 
C5 H5 0.9500 . ? 
C6 H6 0.9500 . ? 
C7 C8 1.436(5) . ? 
C7 H7 0.9500 . ? 
C8 C13 1.402(5) . ? 
C8 C9 1.409(5) . ? 
C9 C10 1.378(5) . ? 
C9 H9 0.9500 . ? 
C10 C11 1.396(6) . ? 
C10 C14 1.542(5) . ? 
C11 C12 1.386(5) . ? 
C11 H11 0.9500 . ? 
C12 C13 1.411(5) . ? 
C12 C18 1.540(6) . ? 
C14 C15 1.524(6) . ? 
C14 C16 1.532(6) . ? 
C14 C17 1.539(6) . ? 
C15 H15A 0.9800 . ? 
C15 H15B 0.9800 . ? 
C15 H15C 0.9800 . ? 
C16 H16A 0.9800 . ? 
C16 H16B 0.9800 . ? 
C16 H16C 0.9800 . ? 
C17 H17A 0.9800 . ? 
C17 H17B 0.9800 . ? 
C17 H17C 0.9800 . ? 
C18 C20 1.537(6) . ? 
C18 C21 1.537(6) . ? 
C18 C19 1.539(6) . ? 
C19 H19A 0.9800 . ? 
C19 H19B 0.9800 . ? 
C19 H19C 0.9800 . ? 
C20 H20A 0.9800 . ? 
C20 H20B 0.9800 . ? 
C20 H20C 0.9800 . ? 
C21 H21A 0.9800 . ? 
C21 H21B 0.9800 . ? 
C21 H21C 0.9800 . ? 
C22 C23 1.497(6) . ? 
C22 H22A 0.9900 . ? 
C22 H22B 0.9900 . ? 
C23 C24 1.505(6) . ? 
C23 H23A 0.9900 . ? 
C23 H23B 0.9900 . ? 
C24 C25 1.497(6) . ? 
C24 H24A 0.9900 . ? 
C24 H24B 0.9900 . ? 
C25 H25A 0.9900 . ? 
C25 H25B 0.9900 . ? 
C26 C27 1.489(6) . ? 
C26 H26A 0.9900 . ? 
C26 H26B 0.9900 . ? 
C27 C28 1.459(7) . ? 
C27 H27A 0.9900 . ? 
C27 H27B 0.9900 . ? 
C28 C29 1.488(7) . ? 
C28 H28A 0.9900 . ? 
C28 H28B 0.9900 . ? 
C29 H29A 0.9900 . ? 
C29 H29B 0.9900 . ? 
  
loop_ 
 _geom_angle_atom_site_label_1 
 _geom_angle_atom_site_label_2 
 _geom_angle_atom_site_label_3 
 _geom_angle 
 _geom_angle_site_symmetry_1 
 _geom_angle_site_symmetry_3 
 _geom_angle_publ_flag 
C7 N1 C1 116.3(3) . . ? 
C7 N1 V1 124.5(3) . . ? 
C1 N1 V1 119.1(2) . . ? 
C13 O1 V1 135.1(3) . . ? 
C22 O2 C25 105.8(3) . . ? 
C22 O2 V1 129.8(2) . . ? 
C25 O2 V1 124.4(3) . . ? 
C29 O3 C26 108.7(3) . . ? 
C29 O3 V1 125.0(3) . . ? 
C26 O3 V1 125.5(3) . . ? 
O1 V1 N1 88.91(13) . . ? 
O1 V1 O3 88.54(12) . . ? 
N1 V1 O3 177.41(13) . . ? 
O1 V1 O2 171.75(12) . . ? 
N1 V1 O2 99.34(12) . . ? 
O3 V1 O2 83.22(11) . . ? 
O1 V1 Cl2 94.56(10) . . ? 
N1 V1 Cl2 90.92(10) . . ? 
O3 V1 Cl2 89.70(9) . . ? 
O2 V1 Cl2 85.23(8) . . ? 
O1 V1 Cl1 94.86(10) . . ? 
N1 V1 Cl1 87.81(10) . . ? 
O3 V1 Cl1 91.99(9) . . ? 
O2 V1 Cl1 85.66(8) . . ? 
Cl2 V1 Cl1 170.47(5) . . ? 
C2 C1 C6 119.9(4) . . ? 
C2 C1 N1 119.9(4) . . ? 
C6 C1 N1 120.2(4) . . ? 
C1 C2 C3 119.9(4) . . ? 
C1 C2 H2 120.0 . . ? 
C3 C2 H2 120.0 . . ? 
C4 C3 C2 120.5(5) . . ? 
C4 C3 H3 119.7 . . ? 
C2 C3 H3 119.7 . . ? 
C3 C4 C5 120.1(5) . . ? 
C3 C4 H4 120.0 . . ? 
C5 C4 H4 120.0 . . ? 
C4 C5 C6 119.9(5) . . ? 
C4 C5 H5 120.0 . . ? 
C6 C5 H5 120.0 . . ? 
C5 C6 C1 119.7(4) . . ? 
C5 C6 H6 120.2 . . ? 
C1 C6 H6 120.2 . . ? 
N1 C7 C8 126.5(4) . . ? 
N1 C7 H7 116.8 . . ? 
C8 C7 H7 116.8 . . ? 
C13 C8 C9 120.1(4) . . ? 
C13 C8 C7 123.6(4) . . ? 
C9 C8 C7 116.3(4) . . ? 
C10 C9 C8 121.2(4) . . ? 
C10 C9 H9 119.4 . . ? 
C8 C9 H9 119.4 . . ? 
C9 C10 C11 117.2(4) . . ? 
C9 C10 C14 122.7(4) . . ? 
C11 C10 C14 120.1(4) . . ? 
C12 C11 C10 124.2(4) . . ? 
C12 C11 H11 117.9 . . ? 
C10 C11 H11 117.9 . . ? 
C11 C12 C13 117.7(4) . . ? 
C11 C12 C18 121.6(4) . . ? 
C13 C12 C18 120.8(4) . . ? 
O1 C13 C8 120.8(4) . . ? 
O1 C13 C12 119.7(4) . . ? 
C8 C13 C12 119.4(4) . . ? 
C15 C14 C16 108.8(4) . . ? 
C15 C14 C17 107.8(4) . . ? 
C16 C14 C17 110.2(4) . . ? 
C15 C14 C10 112.2(4) . . ? 
C16 C14 C10 109.6(4) . . ? 
C17 C14 C10 108.2(3) . . ? 
C14 C15 H15A 109.5 . . ? 
C14 C15 H15B 109.5 . . ? 
H15A C15 H15B 109.5 . . ? 
C14 C15 H15C 109.5 . . ? 
H15A C15 H15C 109.5 . . ? 
H15B C15 H15C 109.5 . . ? 
C14 C16 H16A 109.5 . . ? 
C14 C16 H16B 109.5 . . ? 
H16A C16 H16B 109.5 . . ? 
C14 C16 H16C 109.5 . . ? 
H16A C16 H16C 109.5 . . ? 
H16B C16 H16C 109.5 . . ? 
C14 C17 H17A 109.5 . . ? 
C14 C17 H17B 109.5 . . ? 
H17A C17 H17B 109.5 . . ? 
C14 C17 H17C 109.5 . . ? 
H17A C17 H17C 109.5 . . ? 
H17B C17 H17C 109.5 . . ? 
C20 C18 C21 107.5(4) . . ? 
C20 C18 C19 110.9(4) . . ? 
C21 C18 C19 106.7(4) . . ? 
C20 C18 C12 108.9(4) . . ? 
C21 C18 C12 112.6(4) . . ? 
C19 C18 C12 110.2(4) . . ? 
C18 C19 H19A 109.5 . . ? 
C18 C19 H19B 109.5 . . ? 
H19A C19 H19B 109.5 . . ? 
C18 C19 H19C 109.5 . . ? 
H19A C19 H19C 109.5 . . ? 
H19B C19 H19C 109.5 . . ? 
C18 C20 H20A 109.5 . . ? 
C18 C20 H20B 109.5 . . ? 
H20A C20 H20B 109.5 . . ? 
C18 C20 H20C 109.5 . . ? 
H20A C20 H20C 109.5 . . ? 
H20B C20 H20C 109.5 . . ? 
C18 C21 H21A 109.5 . . ? 
C18 C21 H21B 109.5 . . ? 
H21A C21 H21B 109.5 . . ? 
C18 C21 H21C 109.5 . . ? 
H21A C21 H21C 109.5 . . ? 
H21B C21 H21C 109.5 . . ? 
O2 C22 C23 104.4(4) . . ? 
O2 C22 H22A 110.9 . . ? 
C23 C22 H22A 110.9 . . ? 
O2 C22 H22B 110.9 . . ? 
C23 C22 H22B 110.9 . . ? 
H22A C22 H22B 108.9 . . ? 
C22 C23 C24 103.4(4) . . ? 
C22 C23 H23A 111.1 . . ? 
C24 C23 H23A 111.1 . . ? 
C22 C23 H23B 111.1 . . ? 
C24 C23 H23B 111.1 . . ? 
H23A C23 H23B 109.0 . . ? 
C25 C24 C23 106.1(4) . . ? 
C25 C24 H24A 110.5 . . ? 
C23 C24 H24A 110.5 . . ? 
C25 C24 H24B 110.5 . . ? 
C23 C24 H24B 110.5 . . ? 
H24A C24 H24B 108.7 . . ? 
O2 C25 C24 106.2(4) . . ? 
O2 C25 H25A 110.5 . . ? 
C24 C25 H25A 110.5 . . ? 
O2 C25 H25B 110.5 . . ? 
C24 C25 H25B 110.5 . . ? 
H25A C25 H25B 108.7 . . ? 
O3 C26 C27 105.0(4) . . ? 
O3 C26 H26A 110.8 . . ? 
C27 C26 H26A 110.8 . . ? 
O3 C26 H26B 110.8 . . ? 
C27 C26 H26B 110.8 . . ? 
H26A C26 H26B 108.8 . . ? 
C28 C27 C26 103.8(4) . . ? 
C28 C27 H27A 111.0 . . ? 
C26 C27 H27A 111.0 . . ? 
C28 C27 H27B 111.0 . . ? 
C26 C27 H27B 111.0 . . ? 
H27A C27 H27B 109.0 . . ? 
C27 C28 C29 103.8(5) . . ? 
C27 C28 H28A 111.0 . . ? 
C29 C28 H28A 111.0 . . ? 
C27 C28 H28B 111.0 . . ? 
C29 C28 H28B 111.0 . . ? 
H28A C28 H28B 109.0 . . ? 
O3 C29 C28 105.2(4) . . ? 
O3 C29 H29A 110.7 . . ? 
C28 C29 H29A 110.7 . . ? 
O3 C29 H29B 110.7 . . ? 
C28 C29 H29B 110.7 . . ? 
H29A C29 H29B 108.8 . . ? 
  
_diffrn_measured_fraction_theta_max    0.998 
_diffrn_reflns_theta_full              25.03 
_diffrn_measured_fraction_theta_full   0.998 
_refine_diff_density_max    0.441 
_refine_diff_density_min   -0.267 
_refine_diff_density_rms    0.071 


  
data_2k 
  
_audit_creation_method            SHELXL-97 
_chemical_name_systematic 
; 
 ? 
; 
_chemical_name_common             ? 
_chemical_melting_point           ? 
_chemical_formula_moiety          ? 
_chemical_formula_sum 
 'C21 H24 Br2 Cl2 N O3 V' 
_chemical_formula_weight          620.07 
  
loop_ 
 _atom_type_symbol 
 _atom_type_description 
 _atom_type_scat_dispersion_real 
 _atom_type_scat_dispersion_imag 
 _atom_type_scat_source 
 'C'  'C'   0.0033   0.0016 
 'International Tables Vol C Tables 4.2.6.8 and 6.1.1.4' 
 'H'  'H'   0.0000   0.0000 
 'International Tables Vol C Tables 4.2.6.8 and 6.1.1.4' 
 'N'  'N'   0.0061   0.0033 
 'International Tables Vol C Tables 4.2.6.8 and 6.1.1.4' 
 'O'  'O'   0.0106   0.0060 
 'International Tables Vol C Tables 4.2.6.8 and 6.1.1.4' 
 'Cl'  'Cl'   0.1484   0.1585 
 'International Tables Vol C Tables 4.2.6.8 and 6.1.1.4' 
 'V'  'V'   0.3005   0.5294 
 'International Tables Vol C Tables 4.2.6.8 and 6.1.1.4' 
 'Br'  'Br'  -0.2901   2.4595 
 'International Tables Vol C Tables 4.2.6.8 and 6.1.1.4' 
  
_symmetry_cell_setting            Triclinic 
_symmetry_space_group_name_H-M    P-1 
  
loop_ 
 _symmetry_equiv_pos_as_xyz 
 'x, y, z' 
 '-x, -y, -z' 
  
_cell_length_a                    7.7892(7) 
_cell_length_b                    11.9960(11) 
_cell_length_c                    13.9022(13) 
_cell_angle_alpha                 106.9170(10) 
_cell_angle_beta                  92.6990(10) 
_cell_angle_gamma                 103.1800(10) 
_cell_volume                      1201.06(19) 
_cell_formula_units_Z             2 
_cell_measurement_temperature     187(2) 
_cell_measurement_reflns_used     3438 
_cell_measurement_theta_min       2.71 
_cell_measurement_theta_max       26.04 
  
_exptl_crystal_description        ? 
_exptl_crystal_colour             ? 
_exptl_crystal_size_max           0.46 
_exptl_crystal_size_mid           0.26 
_exptl_crystal_size_min           0.16 
_exptl_crystal_density_meas       ? 
_exptl_crystal_density_diffrn     1.715 
_exptl_crystal_density_method     'not measured' 
_exptl_crystal_F_000              616 
_exptl_absorpt_coefficient_mu     3.985 
_exptl_absorpt_correction_type    multi-scan 
_exptl_absorpt_correction_T_min   0.2593 
_exptl_absorpt_correction_T_max   0.5663 
_exptl_absorpt_process_details    ? 
  
_exptl_special_details 
; 
 ? 
; 
  
_diffrn_ambient_temperature       187(2) 
_diffrn_radiation_wavelength      0.71073 
_diffrn_radiation_type            MoK\a 
_diffrn_radiation_source          'fine-focus sealed tube' 
_diffrn_radiation_monochromator   graphite 
_diffrn_measurement_device_type   'CCD area detector' 
_diffrn_measurement_method        'phi and omega scans' 
_diffrn_detector_area_resol_mean  ? 
_diffrn_standards_number          ? 
_diffrn_standards_interval_count  ? 
_diffrn_standards_interval_time   ? 
_diffrn_standards_decay_%         ? 
_diffrn_reflns_number             6744 
_diffrn_reflns_av_R_equivalents   0.0124 
_diffrn_reflns_av_sigmaI/netI     0.0240 
_diffrn_reflns_limit_h_min        -6 
_diffrn_reflns_limit_h_max        9 
_diffrn_reflns_limit_k_min        -14 
_diffrn_reflns_limit_k_max        13 
_diffrn_reflns_limit_l_min        -17 
_diffrn_reflns_limit_l_max        17 
_diffrn_reflns_theta_min          1.54 
_diffrn_reflns_theta_max          26.04 
_reflns_number_total              4623 
_reflns_number_gt                 3908 
_reflns_threshold_expression      >2sigma(I) 
  
_computing_data_collection        'Bruker SMART' 
_computing_cell_refinement        'Bruker SMART' 
_computing_data_reduction         'Bruker SAINT' 
_computing_structure_solution     'SHELXS-97 (Sheldrick, 1990)' 
_computing_structure_refinement   'SHELXL-97 (Sheldrick, 1997)' 
_computing_molecular_graphics     'Bruker SHELXTL' 
_computing_publication_material   'Bruker SHELXTL' 
  
_refine_special_details 
; 
 Refinement of F^2^ against ALL reflections.  The weighted R-factor wR and 
 goodness of fit S are based on F^2^, conventional R-factors R are based 
 on F, with F set to zero for negative F^2^. The threshold expression of 
 F^2^ > 2sigma(F^2^) is used only for calculating R-factors(gt) etc. and is 
 not relevant to the choice of reflections for refinement.  R-factors based 
 on F^2^ are statistically about twice as large as those based on F, and R- 
 factors based on ALL data will be even larger. 
; 
  
_refine_ls_structure_factor_coef  Fsqd 
_refine_ls_matrix_type            full 
_refine_ls_weighting_scheme       calc 
_refine_ls_weighting_details 
 'calc w=1/[\s^2^(Fo^2^)+(0.0496P)^2^+0.6773P] where P=(Fo^2^+2Fc^2^)/3' 
_atom_sites_solution_primary      direct 
_atom_sites_solution_secondary    difmap 
_atom_sites_solution_hydrogens    geom 
_refine_ls_hydrogen_treatment     constr 
_refine_ls_extinction_method      none 
_refine_ls_extinction_coef        ? 
_refine_ls_number_reflns          4623 
_refine_ls_number_parameters      271 
_refine_ls_number_restraints      0 
_refine_ls_R_factor_all           0.0406 
_refine_ls_R_factor_gt            0.0330 
_refine_ls_wR_factor_ref          0.0895 
_refine_ls_wR_factor_gt           0.0853 
_refine_ls_goodness_of_fit_ref    1.058 
_refine_ls_restrained_S_all       1.058 
_refine_ls_shift/su_max           0.001 
_refine_ls_shift/su_mean          0.000 
  
loop_ 
 _atom_site_label 
 _atom_site_type_symbol 
 _atom_site_fract_x 
 _atom_site_fract_y 
 _atom_site_fract_z 
 _atom_site_U_iso_or_equiv 
 _atom_site_adp_type 
 _atom_site_occupancy 
 _atom_site_symmetry_multiplicity 
 _atom_site_calc_flag 
 _atom_site_refinement_flags 
 _atom_site_disorder_assembly 
 _atom_site_disorder_group 
Br1 Br 1.24458(5) 0.53076(3) 0.28183(3) 0.05679(13) Uani 1 1 d . . . 
Br2 Br 1.65618(5) 0.33391(3) -0.01520(3) 0.04825(12) Uani 1 1 d . . . 
V V 0.93949(6) 0.13937(4) 0.28185(3) 0.02444(12) Uani 1 1 d . . . 
Cl1 Cl 1.09820(10) 0.16615(7) 0.43900(5) 0.03847(18) Uani 1 1 d . . . 
Cl2 Cl 0.77074(9) 0.10480(6) 0.12637(5) 0.03305(16) Uani 1 1 d . . . 
O1 O 1.1027(2) 0.27287(16) 0.26572(14) 0.0306(4) Uani 1 1 d . . . 
O2 O 0.7442(3) 0.00108(17) 0.30524(14) 0.0305(4) Uani 1 1 d . . . 
O3 O 0.7862(3) 0.25442(18) 0.35921(15) 0.0342(5) Uani 1 1 d . . . 
N1 N 1.0885(3) 0.0263(2) 0.19941(16) 0.0263(5) Uani 1 1 d . . . 
C1 C 1.2173(3) 0.2810(2) 0.2001(2) 0.0272(6) Uani 1 1 d . . . 
C2 C 1.3042(4) 0.3950(3) 0.1947(2) 0.0333(6) Uani 1 1 d . . . 
C3 C 1.4320(4) 0.4122(3) 0.1315(2) 0.0357(7) Uani 1 1 d . . . 
H3 H 1.4883 0.4907 0.1303 0.043 Uiso 1 1 calc R . . 
C4 C 1.4762(4) 0.3117(3) 0.0698(2) 0.0326(6) Uani 1 1 d . . . 
C5 C 1.3966(4) 0.1972(3) 0.0707(2) 0.0293(6) Uani 1 1 d . . . 
H5 H 1.4283 0.1298 0.0270 0.035 Uiso 1 1 calc R . . 
C6 C 1.2678(3) 0.1802(2) 0.1368(2) 0.0264(6) Uani 1 1 d . . . 
C7 C 1.2030(3) 0.0588(2) 0.1417(2) 0.0268(6) Uani 1 1 d . . . 
H7 H 1.2485 -0.0023 0.0987 0.032 Uiso 1 1 calc R . . 
C8 C 1.0419(4) -0.0998(2) 0.1907(2) 0.0288(6) Uani 1 1 d . . . 
C9 C 0.9897(4) -0.1868(3) 0.0965(2) 0.0336(6) Uani 1 1 d . . . 
H9 H 0.9929 -0.1640 0.0365 0.040 Uiso 1 1 calc R . . 
C10 C 0.9328(4) -0.3073(3) 0.0906(3) 0.0394(7) Uani 1 1 d . . . 
H10 H 0.8961 -0.3669 0.0263 0.047 Uiso 1 1 calc R . . 
C11 C 0.9292(5) -0.3414(3) 0.1775(3) 0.0459(8) Uani 1 1 d . . . 
H11 H 0.8896 -0.4239 0.1729 0.055 Uiso 1 1 calc R . . 
C12 C 0.9833(5) -0.2547(3) 0.2712(3) 0.0440(8) Uani 1 1 d . . . 
H12 H 0.9826 -0.2781 0.3309 0.053 Uiso 1 1 calc R . . 
C13 C 1.0386(4) -0.1340(3) 0.2785(2) 0.0359(7) Uani 1 1 d . . . 
H13 H 1.0741 -0.0747 0.3430 0.043 Uiso 1 1 calc R . . 
C14 C 0.6155(4) -0.0970(3) 0.2282(2) 0.0387(7) Uani 1 1 d . . . 
H14A H 0.6764 -0.1386 0.1731 0.046 Uiso 1 1 calc R . . 
H14B H 0.5261 -0.0655 0.1987 0.046 Uiso 1 1 calc R . . 
C15 C 0.5293(5) -0.1813(3) 0.2839(3) 0.0568(10) Uani 1 1 d . . . 
H15A H 0.4065 -0.2247 0.2522 0.068 Uiso 1 1 calc R . . 
H15B H 0.5984 -0.2407 0.2853 0.068 Uiso 1 1 calc R . . 
C16 C 0.5305(5) -0.0986(4) 0.3885(3) 0.0566(10) Uani 1 1 d . . . 
H16A H 0.5217 -0.1426 0.4390 0.068 Uiso 1 1 calc R . . 
H16B H 0.4319 -0.0587 0.3914 0.068 Uiso 1 1 calc R . . 
C17 C 0.7091(5) -0.0083(3) 0.4058(2) 0.0451(8) Uani 1 1 d . . . 
H17A H 0.7047 0.0708 0.4525 0.054 Uiso 1 1 calc R . . 
H17B H 0.8027 -0.0369 0.4350 0.054 Uiso 1 1 calc R . . 
C18 C 0.5966(4) 0.2392(3) 0.3366(3) 0.0511(9) Uani 1 1 d . . . 
H18A H 0.5282 0.1632 0.3454 0.061 Uiso 1 1 calc R . . 
H18B H 0.5672 0.2380 0.2662 0.061 Uiso 1 1 calc R . . 
C19 C 0.5560(4) 0.3465(3) 0.4114(3) 0.0499(9) Uani 1 1 d . . . 
H19A H 0.4511 0.3670 0.3848 0.060 Uiso 1 1 calc R . . 
H19B H 0.5356 0.3323 0.4771 0.060 Uiso 1 1 calc R . . 
C20 C 0.7230(6) 0.4429(4) 0.4211(4) 0.0653(11) Uani 1 1 d . . . 
H20A H 0.7353 0.5112 0.4837 0.078 Uiso 1 1 calc R . . 
H20B H 0.7266 0.4730 0.3619 0.078 Uiso 1 1 calc R . . 
C21 C 0.8664(5) 0.3754(3) 0.4253(3) 0.0512(9) Uani 1 1 d . . . 
H21A H 0.9754 0.4123 0.4005 0.061 Uiso 1 1 calc R . . 
H21B H 0.8967 0.3754 0.4952 0.061 Uiso 1 1 calc R . . 
  
loop_ 
 _atom_site_aniso_label 
 _atom_site_aniso_U_11 
 _atom_site_aniso_U_22 
 _atom_site_aniso_U_33 
 _atom_site_aniso_U_23 
 _atom_site_aniso_U_13 
 _atom_site_aniso_U_12 
Br1 0.0653(3) 0.02761(17) 0.0808(3) 0.01492(17) 0.0355(2) 0.01522(16) 
Br2 0.0460(2) 0.0495(2) 0.0459(2) 0.01548(15) 0.02192(15) 0.00140(15) 
V 0.0234(2) 0.0265(2) 0.0234(2) 0.00727(18) 0.00457(18) 0.00638(18) 
Cl1 0.0379(4) 0.0442(4) 0.0299(4) 0.0102(3) -0.0033(3) 0.0069(3) 
Cl2 0.0358(4) 0.0387(4) 0.0262(3) 0.0096(3) 0.0026(3) 0.0132(3) 
O1 0.0293(10) 0.0264(10) 0.0359(10) 0.0079(8) 0.0115(8) 0.0078(8) 
O2 0.0302(10) 0.0338(10) 0.0265(10) 0.0106(8) 0.0077(8) 0.0034(8) 
O3 0.0260(10) 0.0349(11) 0.0338(11) -0.0008(9) 0.0035(8) 0.0074(8) 
N1 0.0280(12) 0.0268(12) 0.0256(11) 0.0090(9) 0.0026(9) 0.0092(9) 
C1 0.0240(13) 0.0287(14) 0.0285(14) 0.0079(11) 0.0016(11) 0.0074(11) 
C2 0.0336(15) 0.0303(15) 0.0381(16) 0.0118(12) 0.0057(13) 0.0107(12) 
C3 0.0366(16) 0.0309(15) 0.0419(17) 0.0172(13) 0.0078(13) 0.0047(12) 
C4 0.0284(14) 0.0419(17) 0.0303(14) 0.0163(13) 0.0084(12) 0.0068(12) 
C5 0.0257(14) 0.0367(15) 0.0273(14) 0.0116(12) 0.0046(11) 0.0090(12) 
C6 0.0237(13) 0.0299(14) 0.0263(13) 0.0091(11) 0.0014(11) 0.0078(11) 
C7 0.0245(13) 0.0280(14) 0.0273(13) 0.0054(11) 0.0038(11) 0.0098(11) 
C8 0.0250(14) 0.0298(14) 0.0362(15) 0.0127(12) 0.0079(12) 0.0115(11) 
C9 0.0321(15) 0.0335(15) 0.0368(16) 0.0124(13) 0.0048(12) 0.0095(12) 
C10 0.0374(17) 0.0306(16) 0.0452(18) 0.0042(13) 0.0013(14) 0.0094(13) 
C11 0.0461(19) 0.0302(16) 0.067(2) 0.0206(16) 0.0120(17) 0.0117(14) 
C12 0.053(2) 0.0409(18) 0.0467(19) 0.0236(15) 0.0091(16) 0.0148(15) 
C13 0.0428(17) 0.0348(16) 0.0340(15) 0.0127(13) 0.0056(13) 0.0146(14) 
C14 0.0349(16) 0.0355(16) 0.0366(16) 0.0060(13) 0.0067(13) -0.0030(13) 
C15 0.055(2) 0.045(2) 0.063(2) 0.0160(18) 0.0159(19) -0.0044(17) 
C16 0.054(2) 0.062(2) 0.049(2) 0.0240(18) 0.0172(17) -0.0058(18) 
C17 0.049(2) 0.057(2) 0.0301(16) 0.0201(15) 0.0130(14) 0.0046(16) 
C18 0.0296(17) 0.059(2) 0.054(2) -0.0021(17) -0.0006(15) 0.0163(16) 
C19 0.0368(18) 0.059(2) 0.049(2) 0.0015(17) 0.0028(15) 0.0216(16) 
C20 0.064(3) 0.045(2) 0.082(3) 0.004(2) 0.020(2) 0.0236(19) 
C21 0.0422(19) 0.0401(18) 0.056(2) -0.0067(16) 0.0073(16) 0.0080(15) 
  
_geom_special_details 
; 
 All esds (except the esd in the dihedral angle between two l.s. planes) 
 are estimated using the full covariance matrix.  The cell esds are taken 
 into account individually in the estimation of esds in distances, angles 
 and torsion angles; correlations between esds in cell parameters are only 
 used when they are defined by crystal symmetry.  An approximate (isotropic) 
 treatment of cell esds is used for estimating esds involving l.s. planes. 
; 
  
loop_ 
 _geom_bond_atom_site_label_1 
 _geom_bond_atom_site_label_2 
 _geom_bond_distance 
 _geom_bond_site_symmetry_2 
 _geom_bond_publ_flag 
Br1 C2 1.893(3) . ? 
Br2 C4 1.898(3) . ? 
V O1 1.8813(19) . ? 
V O2 2.0931(19) . ? 
V N1 2.107(2) . ? 
V O3 2.1203(19) . ? 
V Cl2 2.3525(8) . ? 
V Cl1 2.3581(8) . ? 
O1 C1 1.314(3) . ? 
O2 C17 1.468(3) . ? 
O2 C14 1.471(3) . ? 
O3 C21 1.448(4) . ? 
O3 C18 1.453(4) . ? 
N1 C7 1.297(3) . ? 
N1 C8 1.440(3) . ? 
C1 C2 1.406(4) . ? 
C1 C6 1.422(4) . ? 
C2 C3 1.379(4) . ? 
C3 C4 1.386(4) . ? 
C3 H3 0.9500 . ? 
C4 C5 1.377(4) . ? 
C5 C6 1.412(4) . ? 
C5 H5 0.9500 . ? 
C6 C7 1.451(4) . ? 
C7 H7 0.9500 . ? 
C8 C9 1.390(4) . ? 
C8 C13 1.395(4) . ? 
C9 C10 1.389(4) . ? 
C9 H9 0.9500 . ? 
C10 C11 1.382(5) . ? 
C10 H10 0.9500 . ? 
C11 C12 1.384(5) . ? 
C11 H11 0.9500 . ? 
C12 C13 1.384(4) . ? 
C12 H12 0.9500 . ? 
C13 H13 0.9500 . ? 
C14 C15 1.506(4) . ? 
C14 H14A 0.9900 . ? 
C14 H14B 0.9900 . ? 
C15 C16 1.501(5) . ? 
C15 H15A 0.9900 . ? 
C15 H15B 0.9900 . ? 
C16 C17 1.515(5) . ? 
C16 H16A 0.9900 . ? 
C16 H16B 0.9900 . ? 
C17 H17A 0.9900 . ? 
C17 H17B 0.9900 . ? 
C18 C19 1.509(5) . ? 
C18 H18A 0.9900 . ? 
C18 H18B 0.9900 . ? 
C19 C20 1.501(6) . ? 
C19 H19A 0.9900 . ? 
C19 H19B 0.9900 . ? 
C20 C21 1.530(5) . ? 
C20 H20A 0.9900 . ? 
C20 H20B 0.9900 . ? 
C21 H21A 0.9900 . ? 
C21 H21B 0.9900 . ? 
  
loop_ 
 _geom_angle_atom_site_label_1 
 _geom_angle_atom_site_label_2 
 _geom_angle_atom_site_label_3 
 _geom_angle 
 _geom_angle_site_symmetry_1 
 _geom_angle_site_symmetry_3 
 _geom_angle_publ_flag 
O1 V O2 174.99(8) . . ? 
O1 V N1 89.18(8) . . ? 
O2 V N1 95.78(8) . . ? 
O1 V O3 90.02(8) . . ? 
O2 V O3 85.00(8) . . ? 
N1 V O3 177.64(8) . . ? 
O1 V Cl2 92.00(7) . . ? 
O2 V Cl2 87.62(6) . . ? 
N1 V Cl2 86.84(6) . . ? 
O3 V Cl2 90.96(6) . . ? 
O1 V Cl1 90.82(7) . . ? 
O2 V Cl1 89.56(6) . . ? 
N1 V Cl1 93.35(6) . . ? 
O3 V Cl1 88.88(6) . . ? 
Cl2 V Cl1 177.18(3) . . ? 
C1 O1 V 131.45(17) . . ? 
C17 O2 C14 108.8(2) . . ? 
C17 O2 V 123.68(18) . . ? 
C14 O2 V 127.47(16) . . ? 
C21 O3 C18 109.6(2) . . ? 
C21 O3 V 122.30(18) . . ? 
C18 O3 V 126.39(18) . . ? 
C7 N1 C8 116.2(2) . . ? 
C7 N1 V 123.35(18) . . ? 
C8 N1 V 119.45(16) . . ? 
O1 C1 C2 119.5(2) . . ? 
O1 C1 C6 123.5(2) . . ? 
C2 C1 C6 116.9(2) . . ? 
C3 C2 C1 123.3(3) . . ? 
C3 C2 Br1 119.1(2) . . ? 
C1 C2 Br1 117.5(2) . . ? 
C2 C3 C4 118.2(3) . . ? 
C2 C3 H3 120.9 . . ? 
C4 C3 H3 120.9 . . ? 
C5 C4 C3 121.8(3) . . ? 
C5 C4 Br2 119.4(2) . . ? 
C3 C4 Br2 118.8(2) . . ? 
C4 C5 C6 119.8(3) . . ? 
C4 C5 H5 120.1 . . ? 
C6 C5 H5 120.1 . . ? 
C5 C6 C1 120.0(2) . . ? 
C5 C6 C7 116.9(2) . . ? 
C1 C6 C7 123.0(2) . . ? 
N1 C7 C6 125.8(2) . . ? 
N1 C7 H7 117.1 . . ? 
C6 C7 H7 117.1 . . ? 
C9 C8 C13 120.0(3) . . ? 
C9 C8 N1 120.6(2) . . ? 
C13 C8 N1 119.3(2) . . ? 
C10 C9 C8 119.5(3) . . ? 
C10 C9 H9 120.2 . . ? 
C8 C9 H9 120.2 . . ? 
C11 C10 C9 120.6(3) . . ? 
C11 C10 H10 119.7 . . ? 
C9 C10 H10 119.7 . . ? 
C10 C11 C12 119.7(3) . . ? 
C10 C11 H11 120.1 . . ? 
C12 C11 H11 120.1 . . ? 
C13 C12 C11 120.4(3) . . ? 
C13 C12 H12 119.8 . . ? 
C11 C12 H12 119.8 . . ? 
C12 C13 C8 119.7(3) . . ? 
C12 C13 H13 120.1 . . ? 
C8 C13 H13 120.1 . . ? 
O2 C14 C15 105.0(3) . . ? 
O2 C14 H14A 110.7 . . ? 
C15 C14 H14A 110.7 . . ? 
O2 C14 H14B 110.7 . . ? 
C15 C14 H14B 110.7 . . ? 
H14A C14 H14B 108.8 . . ? 
C16 C15 C14 103.3(3) . . ? 
C16 C15 H15A 111.1 . . ? 
C14 C15 H15A 111.1 . . ? 
C16 C15 H15B 111.1 . . ? 
C14 C15 H15B 111.1 . . ? 
H15A C15 H15B 109.1 . . ? 
C15 C16 C17 102.6(3) . . ? 
C15 C16 H16A 111.2 . . ? 
C17 C16 H16A 111.2 . . ? 
C15 C16 H16B 111.2 . . ? 
C17 C16 H16B 111.2 . . ? 
H16A C16 H16B 109.2 . . ? 
O2 C17 C16 105.2(3) . . ? 
O2 C17 H17A 110.7 . . ? 
C16 C17 H17A 110.7 . . ? 
O2 C17 H17B 110.7 . . ? 
C16 C17 H17B 110.7 . . ? 
H17A C17 H17B 108.8 . . ? 
O3 C18 C19 105.0(3) . . ? 
O3 C18 H18A 110.8 . . ? 
C19 C18 H18A 110.8 . . ? 
O3 C18 H18B 110.8 . . ? 
C19 C18 H18B 110.8 . . ? 
H18A C18 H18B 108.8 . . ? 
C20 C19 C18 101.6(3) . . ? 
C20 C19 H19A 111.4 . . ? 
C18 C19 H19A 111.4 . . ? 
C20 C19 H19B 111.4 . . ? 
C18 C19 H19B 111.4 . . ? 
H19A C19 H19B 109.3 . . ? 
C19 C20 C21 101.9(3) . . ? 
C19 C20 H20A 111.4 . . ? 
C21 C20 H20A 111.4 . . ? 
C19 C20 H20B 111.4 . . ? 
C21 C20 H20B 111.4 . . ? 
H20A C20 H20B 109.3 . . ? 
O3 C21 C20 104.0(3) . . ? 
O3 C21 H21A 111.0 . . ? 
C20 C21 H21A 111.0 . . ? 
O3 C21 H21B 111.0 . . ? 
C20 C21 H21B 111.0 . . ? 
H21A C21 H21B 109.0 . . ? 
  
_diffrn_measured_fraction_theta_max    0.973 
_diffrn_reflns_theta_full              26.04 
_diffrn_measured_fraction_theta_full   0.973 
_refine_diff_density_max    1.437 
_refine_diff_density_min   -0.914 
_refine_diff_density_rms    0.072 


  
data_3b 
  
_audit_creation_method            SHELXL-97 
_chemical_name_systematic 
; 
 ? 
; 
_chemical_name_common             ? 
_chemical_melting_point           ? 
_chemical_formula_moiety          ? 
_chemical_formula_sum 
 'C32 H26 Cl F6 N2 O3 V' 
_chemical_formula_weight          686.94 
  
loop_ 
 _atom_type_symbol 
 _atom_type_description 
 _atom_type_scat_dispersion_real 
 _atom_type_scat_dispersion_imag 
 _atom_type_scat_source 
 'C'  'C'   0.0033   0.0016 
 'International Tables Vol C Tables 4.2.6.8 and 6.1.1.4' 
 'H'  'H'   0.0000   0.0000 
 'International Tables Vol C Tables 4.2.6.8 and 6.1.1.4' 
 'N'  'N'   0.0061   0.0033 
 'International Tables Vol C Tables 4.2.6.8 and 6.1.1.4' 
 'O'  'O'   0.0106   0.0060 
 'International Tables Vol C Tables 4.2.6.8 and 6.1.1.4' 
 'F'  'F'   0.0171   0.0103 
 'International Tables Vol C Tables 4.2.6.8 and 6.1.1.4' 
 'Cl'  'Cl'   0.1484   0.1585 
 'International Tables Vol C Tables 4.2.6.8 and 6.1.1.4' 
 'V'  'V'   0.3005   0.5294 
 'International Tables Vol C Tables 4.2.6.8 and 6.1.1.4' 
  
_symmetry_cell_setting            Monoclinic 
_symmetry_space_group_name_H-M    C2/c 
  
loop_ 
 _symmetry_equiv_pos_as_xyz 
 'x, y, z' 
 '-x, y, -z+1/2' 
 'x+1/2, y+1/2, z' 
 '-x+1/2, y+1/2, -z+1/2' 
 '-x, -y, -z' 
 'x, -y, z-1/2' 
 '-x+1/2, -y+1/2, -z' 
 'x+1/2, -y+1/2, z-1/2' 
  
_cell_length_a                    26.2027(16) 
_cell_length_b                    14.5250(9) 
_cell_length_c                    27.0211(17) 
_cell_angle_alpha                 90.00 
_cell_angle_beta                  117.5080(10) 
_cell_angle_gamma                 90.00 
_cell_volume                      9121.4(10) 
_cell_formula_units_Z             12 
_cell_measurement_temperature     187(2) 
_cell_measurement_reflns_used     3665 
_cell_measurement_theta_min       2.65 
_cell_measurement_theta_max       23.67 
  
_exptl_crystal_description        ? 
_exptl_crystal_colour             ? 
_exptl_crystal_size_max           0.26 
_exptl_crystal_size_mid           0.19 
_exptl_crystal_size_min           0.05 
_exptl_crystal_density_meas       ? 
_exptl_crystal_density_diffrn     1.501 
_exptl_crystal_density_method     'not measured' 
_exptl_crystal_F_000              4200 
_exptl_absorpt_coefficient_mu     0.488 
_exptl_absorpt_correction_type    multi-scan 
_exptl_absorpt_correction_T_min   0.8832 
_exptl_absorpt_correction_T_max   0.9760 
_exptl_absorpt_process_details    ? 
  
_exptl_special_details 
; 
 ? 
; 
  
_diffrn_ambient_temperature       187(2) 
_diffrn_radiation_wavelength      0.71073 
_diffrn_radiation_type            MoK\a 
_diffrn_radiation_source          'fine-focus sealed tube' 
_diffrn_radiation_monochromator   graphite 
_diffrn_measurement_device_type   'CCD area detector' 
_diffrn_measurement_method        'phi and omega scans' 
_diffrn_detector_area_resol_mean  ? 
_diffrn_standards_number          ? 
_diffrn_standards_interval_count  ? 
_diffrn_standards_interval_time   ? 
_diffrn_standards_decay_%         ? 
_diffrn_reflns_number             24215 
_diffrn_reflns_av_R_equivalents   0.0498 
_diffrn_reflns_av_sigmaI/netI     0.0588 
_diffrn_reflns_limit_h_min        -30 
_diffrn_reflns_limit_h_max        31 
_diffrn_reflns_limit_k_min        -17 
_diffrn_reflns_limit_k_max        13 
_diffrn_reflns_limit_l_min        -30 
_diffrn_reflns_limit_l_max        32 
_diffrn_reflns_theta_min          1.65 
_diffrn_reflns_theta_max          25.55 
_reflns_number_total              8529 
_reflns_number_gt                 5958 
_reflns_threshold_expression      >2sigma(I) 
  
_computing_data_collection        'Bruker SMART' 
_computing_cell_refinement        'Bruker SMART' 
_computing_data_reduction         'Bruker SAINT' 
_computing_structure_solution     'SHELXS-97 (Sheldrick, 1990)' 
_computing_structure_refinement   'SHELXL-97 (Sheldrick, 1997)' 
_computing_molecular_graphics     'Bruker SHELXTL' 
_computing_publication_material   'Bruker SHELXTL' 
  
_refine_special_details 
; 
 Refinement of F^2^ against ALL reflections.  The weighted R-factor wR and 
 goodness of fit S are based on F^2^, conventional R-factors R are based 
 on F, with F set to zero for negative F^2^. The threshold expression of 
 F^2^ > 2sigma(F^2^) is used only for calculating R-factors(gt) etc. and is 
 not relevant to the choice of reflections for refinement.  R-factors based 
 on F^2^ are statistically about twice as large as those based on F, and R- 
 factors based on ALL data will be even larger. 
; 
  
_refine_ls_structure_factor_coef  Fsqd 
_refine_ls_matrix_type            full 
_refine_ls_weighting_scheme       calc 
_refine_ls_weighting_details 
 'calc w=1/[\s^2^(Fo^2^)+(0.0698P)^2^+6.4487P] where P=(Fo^2^+2Fc^2^)/3' 
_atom_sites_solution_primary      direct 
_atom_sites_solution_secondary    difmap 
_atom_sites_solution_hydrogens    geom 
_refine_ls_hydrogen_treatment     constr 
_refine_ls_extinction_method      none 
_refine_ls_extinction_coef        ? 
_refine_ls_number_reflns          8529 
_refine_ls_number_parameters      610 
_refine_ls_number_restraints      0 
_refine_ls_R_factor_all           0.0856 
_refine_ls_R_factor_gt            0.0556 
_refine_ls_wR_factor_ref          0.1434 
_refine_ls_wR_factor_gt           0.1274 
_refine_ls_goodness_of_fit_ref    1.009 
_refine_ls_restrained_S_all       1.009 
_refine_ls_shift/su_max           0.001 
_refine_ls_shift/su_mean          0.000 
  
loop_ 
 _atom_site_label 
 _atom_site_type_symbol 
 _atom_site_fract_x 
 _atom_site_fract_y 
 _atom_site_fract_z 
 _atom_site_U_iso_or_equiv 
 _atom_site_adp_type 
 _atom_site_occupancy 
 _atom_site_symmetry_multiplicity 
 _atom_site_calc_flag 
 _atom_site_refinement_flags 
 _atom_site_disorder_assembly 
 _atom_site_disorder_group 
V1 V 0.69479(2) 0.54663(4) 0.78939(2) 0.02713(16) Uani 1 1 d . . . 
V2 V 1.0000 0.40216(5) 0.2500 0.0275(2) Uani 1 2 d S . . 
Cl1 Cl 0.75570(4) 0.57734(6) 0.74969(4) 0.0388(2) Uani 1 1 d . . . 
Cl2 Cl 1.0000 0.24128(9) 0.2500 0.0454(3) Uani 1 2 d S . . 
F1 F 0.46130(11) 0.44925(19) 0.52577(10) 0.0733(8) Uani 1 1 d . . . 
F2 F 0.50502(12) 0.3537(3) 0.50072(11) 0.1051(12) Uani 1 1 d . . . 
F3 F 0.45226(12) 0.3096(2) 0.53801(11) 0.0937(11) Uani 1 1 d . . . 
F4 F 0.92254(14) 0.6691(3) 1.05956(13) 0.1235(15) Uani 1 1 d . . . 
F5 F 0.86492(13) 0.7210(3) 1.08402(11) 0.1227(15) Uani 1 1 d . . . 
F6 F 0.9104(2) 0.8088(3) 1.05717(15) 0.176(2) Uani 1 1 d . . . 
F7 F 0.67783(13) 0.4606(3) 0.02038(12) 0.1006(11) Uani 1 1 d . . . 
F8 F 0.73534(14) 0.4871(3) -0.01313(11) 0.1112(13) Uani 1 1 d . . . 
F9 F 0.70998(13) 0.3521(2) -0.00806(11) 0.0982(11) Uani 1 1 d . . . 
N1 N 0.68132(11) 0.41116(18) 0.75636(11) 0.0280(6) Uani 1 1 d . . . 
N2 N 0.71083(12) 0.68388(18) 0.82186(11) 0.0305(6) Uani 1 1 d . . . 
N3 N 0.91418(12) 0.40605(18) 0.23758(11) 0.0300(6) Uani 1 1 d . . . 
O1 O 0.75469(10) 0.49973(16) 0.85672(9) 0.0342(6) Uani 1 1 d . . . 
O2 O 0.62795(9) 0.59472(15) 0.72746(9) 0.0310(5) Uani 1 1 d . . . 
O3 O 0.63656(10) 0.51692(16) 0.82287(9) 0.0352(6) Uani 1 1 d . . . 
O4 O 0.97473(9) 0.41520(16) 0.17203(9) 0.0338(6) Uani 1 1 d . . . 
O5 O 1.0000 0.5500(2) 0.2500 0.0377(8) Uani 1 2 d S . . 
C1 C 0.49087(19) 0.3715(3) 0.54050(16) 0.0540(11) Uani 1 1 d . . . 
C2 C 0.54205(15) 0.3778(2) 0.59683(14) 0.0369(9) Uani 1 1 d . . . 
C3 C 0.58734(16) 0.4354(2) 0.60455(14) 0.0388(9) Uani 1 1 d . . . 
H3 H 0.5864 0.4682 0.5737 0.047 Uiso 1 1 calc R . . 
C4 C 0.63355(15) 0.4452(2) 0.65644(13) 0.0341(8) Uani 1 1 d . . . 
H4 H 0.6643 0.4853 0.6616 0.041 Uiso 1 1 calc R . . 
C5 C 0.63532(14) 0.3964(2) 0.70157(13) 0.0281(7) Uani 1 1 d . . . 
C6 C 0.59042(15) 0.3379(2) 0.69374(14) 0.0346(8) Uani 1 1 d . . . 
H6 H 0.5915 0.3043 0.7244 0.042 Uiso 1 1 calc R . . 
C7 C 0.54395(15) 0.3285(2) 0.64134(14) 0.0385(9) Uani 1 1 d . . . 
H7 H 0.5133 0.2880 0.6360 0.046 Uiso 1 1 calc R . . 
C8 C 0.71066(14) 0.3394(2) 0.78394(13) 0.0301(8) Uani 1 1 d . . . 
H8 H 0.7005 0.2821 0.7649 0.036 Uiso 1 1 calc R . . 
C9 C 0.75652(14) 0.3378(2) 0.83988(13) 0.0289(7) Uani 1 1 d . . . 
C10 C 0.78300(15) 0.2524(2) 0.86118(14) 0.0372(8) Uani 1 1 d . . . 
H10 H 0.7702 0.1993 0.8380 0.045 Uiso 1 1 calc R . . 
C11 C 0.82657(16) 0.2439(3) 0.91421(15) 0.0416(9) Uani 1 1 d . . . 
H11 H 0.8440 0.1857 0.9279 0.050 Uiso 1 1 calc R . . 
C12 C 0.84508(16) 0.3214(3) 0.94779(15) 0.0440(9) Uani 1 1 d . . . 
H12 H 0.8750 0.3158 0.9849 0.053 Uiso 1 1 calc R . . 
C13 C 0.82099(15) 0.4064(3) 0.92841(14) 0.0392(9) Uani 1 1 d . . . 
H13 H 0.8347 0.4587 0.9521 0.047 Uiso 1 1 calc R . . 
C14 C 0.77622(14) 0.4166(2) 0.87387(13) 0.0301(8) Uani 1 1 d . . . 
C15 C 0.8828(2) 0.7331(4) 1.04638(19) 0.0707(14) Uani 1 1 d . . . 
C16 C 0.83693(17) 0.7242(3) 0.98768(16) 0.0476(10) Uani 1 1 d . . . 
C17 C 0.78750(17) 0.6741(3) 0.97578(15) 0.0472(10) Uani 1 1 d . . . 
H17 H 0.7822 0.6479 1.0053 0.057 Uiso 1 1 calc R . . 
C18 C 0.74611(16) 0.6620(3) 0.92130(14) 0.0417(9) Uani 1 1 d . . . 
H18 H 0.7123 0.6278 0.9134 0.050 Uiso 1 1 calc R . . 
C19 C 0.75374(14) 0.6997(2) 0.87828(14) 0.0324(8) Uani 1 1 d . . . 
C20 C 0.80317(16) 0.7492(3) 0.88985(16) 0.0440(9) Uani 1 1 d . . . 
H20 H 0.8088 0.7748 0.8604 0.053 Uiso 1 1 calc R . . 
C21 C 0.84413(17) 0.7610(3) 0.94459(17) 0.0526(11) Uani 1 1 d . . . 
H21 H 0.8780 0.7952 0.9526 0.063 Uiso 1 1 calc R . . 
C22 C 0.69261(15) 0.7551(2) 0.78943(14) 0.0356(8) Uani 1 1 d . . . 
H22 H 0.7092 0.8127 0.8053 0.043 Uiso 1 1 calc R . . 
C23 C 0.64986(14) 0.7557(2) 0.73192(13) 0.0325(8) Uani 1 1 d . . . 
C24 C 0.63750(17) 0.8413(2) 0.70328(15) 0.0419(9) Uani 1 1 d . . . 
H24 H 0.6589 0.8945 0.7218 0.050 Uiso 1 1 calc R . . 
C25 C 0.59516(18) 0.8481(3) 0.64933(16) 0.0479(10) Uani 1 1 d . . . 
H25 H 0.5876 0.9055 0.6304 0.057 Uiso 1 1 calc R . . 
C26 C 0.56338(16) 0.7709(3) 0.62254(15) 0.0434(9) Uani 1 1 d . . . 
H26 H 0.5336 0.7761 0.5853 0.052 Uiso 1 1 calc R . . 
C27 C 0.57406(15) 0.6872(3) 0.64886(14) 0.0387(9) Uani 1 1 d . . . 
H27 H 0.5514 0.6354 0.6297 0.046 Uiso 1 1 calc R . . 
C28 C 0.61794(14) 0.6772(2) 0.70361(13) 0.0306(8) Uani 1 1 d . . . 
C29 C 0.58538(18) 0.5690(3) 0.81135(19) 0.0568(12) Uani 1 1 d . . . 
H29A H 0.5628 0.5806 0.7708 0.068 Uiso 1 1 calc R . . 
H29B H 0.5957 0.6289 0.8310 0.068 Uiso 1 1 calc R . . 
C30 C 0.5513(2) 0.5119(4) 0.8318(2) 0.0784(16) Uani 1 1 d . . . 
H30A H 0.5338 0.5511 0.8499 0.094 Uiso 1 1 calc R . . 
H30B H 0.5203 0.4780 0.8006 0.094 Uiso 1 1 calc R . . 
C31 C 0.59304(19) 0.4477(4) 0.87228(19) 0.0645(13) Uani 1 1 d . . . 
H31A H 0.5743 0.3890 0.8732 0.077 Uiso 1 1 calc R . . 
H31B H 0.6113 0.4747 0.9102 0.077 Uiso 1 1 calc R . . 
C32 C 0.63648(18) 0.4329(3) 0.85149(17) 0.0490(10) Uani 1 1 d . . . 
H32A H 0.6750 0.4211 0.8830 0.059 Uiso 1 1 calc R . . 
H32B H 0.6255 0.3798 0.8256 0.059 Uiso 1 1 calc R . . 
C33 C 0.7251(2) 0.4310(4) 0.01952(18) 0.0640(13) Uani 1 1 d . . . 
C34 C 0.77495(17) 0.4231(3) 0.07632(15) 0.0462(10) Uani 1 1 d . . . 
C35 C 0.78408(18) 0.4916(3) 0.11441(16) 0.0564(12) Uani 1 1 d . . . 
H35 H 0.7588 0.5429 0.1044 0.068 Uiso 1 1 calc R . . 
C36 C 0.83002(17) 0.4863(3) 0.16736(15) 0.0520(11) Uani 1 1 d . . . 
H36 H 0.8362 0.5340 0.1935 0.062 Uiso 1 1 calc R . . 
C37 C 0.86698(14) 0.4119(2) 0.18244(13) 0.0310(8) Uani 1 1 d . . . 
C38 C 0.85814(16) 0.3431(3) 0.14351(16) 0.0443(9) Uani 1 1 d . . . 
H38 H 0.8838 0.2923 0.1530 0.053 Uiso 1 1 calc R . . 
C39 C 0.81192(18) 0.3493(3) 0.09104(16) 0.0531(11) Uani 1 1 d . . . 
H39 H 0.8055 0.3018 0.0646 0.064 Uiso 1 1 calc R . . 
C40 C 0.90025(15) 0.4081(2) 0.27786(14) 0.0317(8) Uani 1 1 d . . . 
H40 H 0.8603 0.4096 0.2672 0.038 Uiso 1 1 calc R . . 
C41 C 0.93829(14) 0.4085(2) 0.33654(13) 0.0309(8) Uani 1 1 d . . . 
C42 C 0.91295(16) 0.4053(2) 0.37266(14) 0.0385(9) Uani 1 1 d . . . 
H42 H 0.8723 0.4011 0.3574 0.046 Uiso 1 1 calc R . . 
C43 C 0.94624(18) 0.4082(3) 0.42937(16) 0.0461(10) Uani 1 1 d . . . 
H43 H 0.9289 0.4054 0.4534 0.055 Uiso 1 1 calc R . . 
C44 C 1.00573(18) 0.4155(3) 0.45154(15) 0.0473(10) Uani 1 1 d . . . 
H44 H 1.0289 0.4177 0.4909 0.057 Uiso 1 1 calc R . . 
C45 C 1.00100(14) 0.4143(2) 0.14053(13) 0.0303(8) Uani 1 1 d . . . 
C46 C 0.96868(16) 0.4193(2) 0.08257(14) 0.0395(9) Uani 1 1 d . . . 
H46 H 0.9281 0.4256 0.0665 0.047 Uiso 1 1 calc R . . 
C47 C 0.9814(2) 0.6069(3) 0.20126(18) 0.0686(14) Uani 1 1 d . . . 
H47A H 0.9427 0.5880 0.1724 0.082 Uiso 1 1 calc R . . 
H47B H 1.0087 0.6025 0.1854 0.082 Uiso 1 1 calc R . . 
C48 C 0.9800(3) 0.7025(3) 0.2207(2) 0.0832(17) Uani 1 1 d . . . 
H48A H 0.9918 0.7474 0.2004 0.100 Uiso 1 1 calc R . . 
H48B H 0.9408 0.7184 0.2148 0.100 Uiso 1 1 calc R . . 
  
loop_ 
 _atom_site_aniso_label 
 _atom_site_aniso_U_11 
 _atom_site_aniso_U_22 
 _atom_site_aniso_U_33 
 _atom_site_aniso_U_23 
 _atom_site_aniso_U_13 
 _atom_site_aniso_U_12 
V1 0.0252(3) 0.0261(3) 0.0250(3) 0.0000(2) 0.0073(2) 0.0003(2) 
V2 0.0265(4) 0.0302(5) 0.0270(4) 0.000 0.0132(4) 0.000 
Cl1 0.0301(5) 0.0443(5) 0.0426(5) 0.0008(4) 0.0173(4) -0.0040(4) 
Cl2 0.0448(8) 0.0309(7) 0.0690(9) 0.000 0.0336(7) 0.000 
F1 0.0558(16) 0.0760(19) 0.0534(15) 0.0143(13) -0.0043(13) 0.0118(14) 
F2 0.072(2) 0.178(4) 0.0358(14) -0.0424(18) -0.0002(14) 0.014(2) 
F3 0.079(2) 0.080(2) 0.0614(17) 0.0078(14) -0.0197(15) -0.0408(17) 
F4 0.071(2) 0.195(4) 0.0609(19) -0.017(2) -0.0070(17) 0.040(3) 
F5 0.066(2) 0.238(5) 0.0407(16) -0.032(2) 0.0045(15) 0.001(2) 
F6 0.202(5) 0.131(3) 0.074(2) -0.017(2) -0.039(3) -0.091(3) 
F7 0.0534(19) 0.147(3) 0.0664(19) 0.0174(19) -0.0022(16) 0.0144(19) 
F8 0.104(2) 0.141(3) 0.0480(16) 0.0385(18) 0.0000(16) -0.056(2) 
F9 0.095(2) 0.100(2) 0.0459(15) -0.0039(16) -0.0126(16) -0.0282(19) 
N1 0.0283(15) 0.0267(15) 0.0270(14) -0.0023(12) 0.0111(13) 0.0000(12) 
N2 0.0299(16) 0.0258(15) 0.0315(15) -0.0006(12) 0.0105(13) 0.0006(13) 
N3 0.0299(16) 0.0306(16) 0.0300(14) -0.0017(12) 0.0144(13) 0.0001(13) 
O1 0.0314(13) 0.0311(13) 0.0271(12) -0.0008(10) 0.0026(10) 0.0032(11) 
O2 0.0275(13) 0.0287(13) 0.0301(12) 0.0039(10) 0.0076(10) -0.0005(10) 
O3 0.0335(14) 0.0358(14) 0.0388(13) 0.0064(11) 0.0188(11) 0.0038(11) 
O4 0.0265(13) 0.0452(15) 0.0277(12) -0.0036(11) 0.0109(11) -0.0032(11) 
O5 0.044(2) 0.0300(18) 0.0338(18) 0.000 0.0129(17) 0.000 
C1 0.054(3) 0.048(3) 0.039(2) -0.0004(19) 0.003(2) -0.004(2) 
C2 0.036(2) 0.034(2) 0.0281(18) -0.0047(15) 0.0035(16) 0.0020(17) 
C3 0.046(2) 0.036(2) 0.0287(18) 0.0019(15) 0.0122(18) 0.0003(18) 
C4 0.037(2) 0.034(2) 0.0294(18) -0.0036(15) 0.0133(16) -0.0062(16) 
C5 0.0299(19) 0.0244(17) 0.0271(17) -0.0027(13) 0.0109(15) 0.0011(15) 
C6 0.039(2) 0.0268(19) 0.0332(18) 0.0012(14) 0.0129(17) 0.0000(16) 
C7 0.034(2) 0.032(2) 0.039(2) -0.0041(16) 0.0077(17) -0.0066(16) 
C8 0.0319(19) 0.0257(18) 0.0338(18) -0.0055(14) 0.0160(16) -0.0020(15) 
C9 0.0285(19) 0.0303(19) 0.0266(16) 0.0004(14) 0.0116(15) 0.0030(15) 
C10 0.039(2) 0.032(2) 0.038(2) 0.0012(16) 0.0160(18) 0.0001(17) 
C11 0.038(2) 0.036(2) 0.045(2) 0.0112(17) 0.0139(19) 0.0097(17) 
C12 0.037(2) 0.047(2) 0.0346(19) 0.0085(17) 0.0057(18) 0.0066(19) 
C13 0.036(2) 0.041(2) 0.0301(18) -0.0030(16) 0.0062(17) 0.0001(17) 
C14 0.0243(18) 0.0336(19) 0.0276(17) 0.0004(14) 0.0078(15) 0.0026(15) 
C15 0.052(3) 0.092(4) 0.048(3) -0.025(3) 0.006(2) 0.000(3) 
C16 0.037(2) 0.054(3) 0.038(2) -0.0134(19) 0.0065(19) 0.003(2) 
C17 0.051(3) 0.054(3) 0.034(2) -0.0040(18) 0.0181(19) 0.001(2) 
C18 0.040(2) 0.047(2) 0.034(2) -0.0072(17) 0.0141(18) -0.0080(18) 
C19 0.0291(19) 0.0270(18) 0.0347(18) -0.0042(15) 0.0093(16) 0.0014(15) 
C20 0.038(2) 0.045(2) 0.042(2) -0.0040(18) 0.0132(19) -0.0054(19) 
C21 0.039(2) 0.056(3) 0.054(3) -0.013(2) 0.014(2) -0.015(2) 
C22 0.040(2) 0.0263(18) 0.044(2) -0.0062(16) 0.0215(18) 0.0002(16) 
C23 0.033(2) 0.0322(19) 0.0303(17) -0.0023(14) 0.0128(16) 0.0063(16) 
C24 0.056(3) 0.029(2) 0.043(2) 0.0002(16) 0.025(2) 0.0079(18) 
C25 0.066(3) 0.034(2) 0.042(2) 0.0092(18) 0.024(2) 0.015(2) 
C26 0.040(2) 0.051(2) 0.0318(19) 0.0098(18) 0.0103(18) 0.0154(19) 
C27 0.032(2) 0.045(2) 0.0326(19) -0.0005(16) 0.0096(17) 0.0039(17) 
C28 0.0245(18) 0.036(2) 0.0319(18) 0.0013(15) 0.0133(15) 0.0072(15) 
C29 0.050(3) 0.061(3) 0.068(3) 0.014(2) 0.035(2) 0.012(2) 
C30 0.065(3) 0.100(4) 0.092(4) 0.033(3) 0.055(3) 0.020(3) 
C31 0.052(3) 0.086(4) 0.068(3) 0.024(3) 0.039(3) 0.010(3) 
C32 0.058(3) 0.049(2) 0.048(2) 0.0140(19) 0.031(2) 0.007(2) 
C33 0.053(3) 0.082(4) 0.038(2) 0.013(2) 0.006(2) -0.015(3) 
C34 0.038(2) 0.061(3) 0.033(2) 0.0035(19) 0.0110(18) -0.009(2) 
C35 0.055(3) 0.069(3) 0.039(2) 0.009(2) 0.016(2) 0.024(2) 
C36 0.051(3) 0.062(3) 0.033(2) -0.0046(19) 0.0110(19) 0.018(2) 
C37 0.0247(18) 0.040(2) 0.0303(17) 0.0017(15) 0.0141(15) -0.0018(16) 
C38 0.035(2) 0.042(2) 0.047(2) -0.0045(18) 0.0119(19) -0.0063(18) 
C39 0.054(3) 0.054(3) 0.041(2) -0.009(2) 0.014(2) -0.017(2) 
C40 0.0281(19) 0.0314(19) 0.0376(19) 0.0020(15) 0.0170(16) 0.0027(15) 
C41 0.032(2) 0.0289(19) 0.0331(18) 0.0014(14) 0.0164(16) 0.0003(15) 
C42 0.039(2) 0.042(2) 0.039(2) 0.0005(17) 0.0221(18) 0.0034(18) 
C43 0.055(3) 0.053(3) 0.043(2) 0.0028(19) 0.034(2) 0.000(2) 
C44 0.057(3) 0.056(3) 0.0270(18) 0.0006(17) 0.0183(19) 0.004(2) 
C45 0.035(2) 0.0287(18) 0.0293(17) -0.0041(14) 0.0165(16) -0.0050(15) 
C46 0.039(2) 0.041(2) 0.0325(19) -0.0063(16) 0.0115(17) -0.0050(18) 
C47 0.104(4) 0.040(2) 0.057(3) 0.013(2) 0.033(3) 0.009(3) 
C48 0.124(5) 0.040(3) 0.090(4) 0.010(2) 0.054(4) 0.015(3) 
  
_geom_special_details 
; 
 All esds (except the esd in the dihedral angle between two l.s. planes) 
 are estimated using the full covariance matrix.  The cell esds are taken 
 into account individually in the estimation of esds in distances, angles 
 and torsion angles; correlations between esds in cell parameters are only 
 used when they are defined by crystal symmetry.  An approximate (isotropic) 
 treatment of cell esds is used for estimating esds involving l.s. planes. 
; 
  
loop_ 
 _geom_bond_atom_site_label_1 
 _geom_bond_atom_site_label_2 
 _geom_bond_distance 
 _geom_bond_site_symmetry_2 
 _geom_bond_publ_flag 
V1 O1 1.897(2) . ? 
V1 O2 1.910(2) . ? 
V1 N1 2.122(3) . ? 
V1 N2 2.140(3) . ? 
V1 O3 2.146(2) . ? 
V1 Cl1 2.3405(10) . ? 
V2 O4 1.904(2) 2_755 ? 
V2 O4 1.904(2) . ? 
V2 N3 2.115(3) . ? 
V2 N3 2.116(3) 2_755 ? 
V2 O5 2.147(3) . ? 
V2 Cl2 2.3368(15) . ? 
F1 C1 1.322(5) . ? 
F2 C1 1.314(5) . ? 
F3 C1 1.332(5) . ? 
F4 C15 1.317(6) . ? 
F5 C15 1.313(6) . ? 
F6 C15 1.273(6) . ? 
F7 C33 1.322(6) . ? 
F8 C33 1.316(5) . ? 
F9 C33 1.324(6) . ? 
N1 C8 1.305(4) . ? 
N1 C5 1.429(4) . ? 
N2 C22 1.296(4) . ? 
N2 C19 1.434(4) . ? 
N3 C40 1.298(4) . ? 
N3 C37 1.433(4) . ? 
O1 C14 1.323(4) . ? 
O2 C28 1.328(4) . ? 
O3 C29 1.443(4) . ? 
O3 C32 1.446(4) . ? 
O4 C45 1.319(4) . ? 
O5 C47 1.436(4) 2_755 ? 
O5 C47 1.436(4) . ? 
C1 C2 1.496(5) . ? 
C2 C7 1.381(5) . ? 
C2 C3 1.386(5) . ? 
C3 C4 1.373(5) . ? 
C3 H3 0.9500 . ? 
C4 C5 1.393(4) . ? 
C4 H4 0.9500 . ? 
C5 C6 1.385(5) . ? 
C6 C7 1.383(5) . ? 
C6 H6 0.9500 . ? 
C7 H7 0.9500 . ? 
C8 C9 1.432(4) . ? 
C8 H8 0.9500 . ? 
C9 C14 1.407(5) . ? 
C9 C10 1.409(5) . ? 
C10 C11 1.364(5) . ? 
C10 H10 0.9500 . ? 
C11 C12 1.386(5) . ? 
C11 H11 0.9500 . ? 
C12 C13 1.375(5) . ? 
C12 H12 0.9500 . ? 
C13 C14 1.405(4) . ? 
C13 H13 0.9500 . ? 
C15 C16 1.488(6) . ? 
C16 C21 1.371(6) . ? 
C16 C17 1.388(5) . ? 
C17 C18 1.378(5) . ? 
C17 H17 0.9500 . ? 
C18 C19 1.380(5) . ? 
C18 H18 0.9500 . ? 
C19 C20 1.385(5) . ? 
C20 C21 1.379(5) . ? 
C20 H20 0.9500 . ? 
C21 H21 0.9500 . ? 
C22 C23 1.436(5) . ? 
C22 H22 0.9500 . ? 
C23 C28 1.412(5) . ? 
C23 C24 1.421(5) . ? 
C24 C25 1.368(5) . ? 
C24 H24 0.9500 . ? 
C25 C26 1.385(5) . ? 
C25 H25 0.9500 . ? 
C26 C27 1.371(5) . ? 
C26 H26 0.9500 . ? 
C27 C28 1.400(5) . ? 
C27 H27 0.9500 . ? 
C29 C30 1.500(6) . ? 
C29 H29A 0.9900 . ? 
C29 H29B 0.9900 . ? 
C30 C31 1.468(6) . ? 
C30 H30A 0.9900 . ? 
C30 H30B 0.9900 . ? 
C31 C32 1.499(5) . ? 
C31 H31A 0.9900 . ? 
C31 H31B 0.9900 . ? 
C32 H32A 0.9900 . ? 
C32 H32B 0.9900 . ? 
C33 C34 1.491(6) . ? 
C34 C39 1.375(6) . ? 
C34 C35 1.371(6) . ? 
C35 C36 1.382(5) . ? 
C35 H35 0.9500 . ? 
C36 C37 1.381(5) . ? 
C36 H36 0.9500 . ? 
C37 C38 1.390(5) . ? 
C38 C39 1.378(5) . ? 
C38 H38 0.9500 . ? 
C39 H39 0.9500 . ? 
C40 C41 1.431(5) . ? 
C40 H40 0.9500 . ? 
C41 C42 1.412(5) . ? 
C41 C45 1.418(5) 2_755 ? 
C42 C43 1.370(5) . ? 
C42 H42 0.9500 . ? 
C43 C44 1.392(6) . ? 
C43 H43 0.9500 . ? 
C44 C46 1.369(5) 2_755 ? 
C44 H44 0.9500 . ? 
C45 C46 1.396(5) . ? 
C45 C41 1.418(5) 2_755 ? 
C46 C44 1.369(5) 2_755 ? 
C46 H46 0.9500 . ? 
C47 C48 1.492(6) . ? 
C47 H47A 0.9900 . ? 
C47 H47B 0.9900 . ? 
C48 C48 1.438(10) 2_755 ? 
C48 H48A 0.9900 . ? 
C48 H48B 0.9900 . ? 
  
loop_ 
 _geom_angle_atom_site_label_1 
 _geom_angle_atom_site_label_2 
 _geom_angle_atom_site_label_3 
 _geom_angle 
 _geom_angle_site_symmetry_1 
 _geom_angle_site_symmetry_3 
 _geom_angle_publ_flag 
O1 V1 O2 171.53(10) . . ? 
O1 V1 N1 88.49(10) . . ? 
O2 V1 N1 93.64(10) . . ? 
O1 V1 N2 91.29(10) . . ? 
O2 V1 N2 86.88(10) . . ? 
N1 V1 N2 177.91(11) . . ? 
O1 V1 O3 87.59(10) . . ? 
O2 V1 O3 84.27(9) . . ? 
N1 V1 O3 88.76(10) . . ? 
N2 V1 O3 93.30(10) . . ? 
O1 V1 Cl1 94.06(8) . . ? 
O2 V1 Cl1 94.14(7) . . ? 
N1 V1 Cl1 90.01(8) . . ? 
N2 V1 Cl1 87.94(8) . . ? 
O3 V1 Cl1 177.92(7) . . ? 
O4 V2 O4 168.58(15) 2_755 . ? 
O4 V2 N3 88.50(10) 2_755 . ? 
O4 V2 N3 91.20(10) . . ? 
O4 V2 N3 91.20(10) 2_755 2_755 ? 
O4 V2 N3 88.50(10) . 2_755 ? 
N3 V2 N3 176.94(15) . 2_755 ? 
O4 V2 O5 84.29(7) 2_755 . ? 
O4 V2 O5 84.29(7) . . ? 
N3 V2 O5 88.47(7) . . ? 
N3 V2 O5 88.47(7) 2_755 . ? 
O4 V2 Cl2 95.71(7) 2_755 . ? 
O4 V2 Cl2 95.71(7) . . ? 
N3 V2 Cl2 91.53(7) . . ? 
N3 V2 Cl2 91.53(7) 2_755 . ? 
O5 V2 Cl2 180.000(1) . . ? 
C8 N1 C5 117.7(3) . . ? 
C8 N1 V1 124.1(2) . . ? 
C5 N1 V1 118.2(2) . . ? 
C22 N2 C19 117.0(3) . . ? 
C22 N2 V1 121.7(2) . . ? 
C19 N2 V1 119.6(2) . . ? 
C40 N3 C37 115.4(3) . . ? 
C40 N3 V2 123.9(2) . . ? 
C37 N3 V2 120.7(2) . . ? 
C14 O1 V1 133.9(2) . . ? 
C28 O2 V1 130.6(2) . . ? 
C29 O3 C32 109.1(3) . . ? 
C29 O3 V1 125.1(2) . . ? 
C32 O3 V1 124.9(2) . . ? 
C45 O4 V2 134.0(2) . . ? 
C47 O5 C47 109.7(4) 2_755 . ? 
C47 O5 V2 125.1(2) 2_755 . ? 
C47 O5 V2 125.1(2) . . ? 
F2 C1 F1 105.6(4) . . ? 
F2 C1 F3 108.7(4) . . ? 
F1 C1 F3 103.6(4) . . ? 
F2 C1 C2 112.7(4) . . ? 
F1 C1 C2 112.3(3) . . ? 
F3 C1 C2 113.3(3) . . ? 
C7 C2 C3 119.9(3) . . ? 
C7 C2 C1 120.6(4) . . ? 
C3 C2 C1 119.5(3) . . ? 
C4 C3 C2 120.4(3) . . ? 
C4 C3 H3 119.8 . . ? 
C2 C3 H3 119.8 . . ? 
C3 C4 C5 119.9(3) . . ? 
C3 C4 H4 120.1 . . ? 
C5 C4 H4 120.1 . . ? 
C6 C5 C4 119.7(3) . . ? 
C6 C5 N1 120.0(3) . . ? 
C4 C5 N1 120.1(3) . . ? 
C7 C6 C5 120.1(3) . . ? 
C7 C6 H6 120.0 . . ? 
C5 C6 H6 120.0 . . ? 
C2 C7 C6 120.0(3) . . ? 
C2 C7 H7 120.0 . . ? 
C6 C7 H7 120.0 . . ? 
N1 C8 C9 127.0(3) . . ? 
N1 C8 H8 116.5 . . ? 
C9 C8 H8 116.5 . . ? 
C14 C9 C10 119.1(3) . . ? 
C14 C9 C8 123.5(3) . . ? 
C10 C9 C8 117.4(3) . . ? 
C11 C10 C9 121.6(3) . . ? 
C11 C10 H10 119.2 . . ? 
C9 C10 H10 119.2 . . ? 
C10 C11 C12 119.0(3) . . ? 
C10 C11 H11 120.5 . . ? 
C12 C11 H11 120.5 . . ? 
C13 C12 C11 121.3(3) . . ? 
C13 C12 H12 119.3 . . ? 
C11 C12 H12 119.3 . . ? 
C12 C13 C14 120.5(3) . . ? 
C12 C13 H13 119.7 . . ? 
C14 C13 H13 119.7 . . ? 
O1 C14 C13 118.5(3) . . ? 
O1 C14 C9 123.0(3) . . ? 
C13 C14 C9 118.4(3) . . ? 
F6 C15 F5 107.9(5) . . ? 
F6 C15 F4 104.6(5) . . ? 
F5 C15 F4 102.5(5) . . ? 
F6 C15 C16 114.4(5) . . ? 
F5 C15 C16 114.4(4) . . ? 
F4 C15 C16 112.0(4) . . ? 
C21 C16 C17 119.2(4) . . ? 
C21 C16 C15 120.7(4) . . ? 
C17 C16 C15 120.0(4) . . ? 
C18 C17 C16 120.2(4) . . ? 
C18 C17 H17 119.9 . . ? 
C16 C17 H17 119.9 . . ? 
C17 C18 C19 120.1(4) . . ? 
C17 C18 H18 120.0 . . ? 
C19 C18 H18 120.0 . . ? 
C18 C19 C20 120.0(3) . . ? 
C18 C19 N2 119.0(3) . . ? 
C20 C19 N2 121.0(3) . . ? 
C21 C20 C19 119.3(4) . . ? 
C21 C20 H20 120.3 . . ? 
C19 C20 H20 120.3 . . ? 
C16 C21 C20 121.2(4) . . ? 
C16 C21 H21 119.4 . . ? 
C20 C21 H21 119.4 . . ? 
N2 C22 C23 126.6(3) . . ? 
N2 C22 H22 116.7 . . ? 
C23 C22 H22 116.7 . . ? 
C28 C23 C24 118.9(3) . . ? 
C28 C23 C22 123.5(3) . . ? 
C24 C23 C22 117.6(3) . . ? 
C25 C24 C23 120.8(4) . . ? 
C25 C24 H24 119.6 . . ? 
C23 C24 H24 119.6 . . ? 
C24 C25 C26 119.6(4) . . ? 
C24 C25 H25 120.2 . . ? 
C26 C25 H25 120.2 . . ? 
C27 C26 C25 121.2(3) . . ? 
C27 C26 H26 119.4 . . ? 
C25 C26 H26 119.4 . . ? 
C26 C27 C28 120.8(4) . . ? 
C26 C27 H27 119.6 . . ? 
C28 C27 H27 119.6 . . ? 
O2 C28 C27 119.2(3) . . ? 
O2 C28 C23 122.1(3) . . ? 
C27 C28 C23 118.7(3) . . ? 
O3 C29 C30 106.4(3) . . ? 
O3 C29 H29A 110.4 . . ? 
C30 C29 H29A 110.4 . . ? 
O3 C29 H29B 110.4 . . ? 
C30 C29 H29B 110.4 . . ? 
H29A C29 H29B 108.6 . . ? 
C31 C30 C29 105.1(4) . . ? 
C31 C30 H30A 110.7 . . ? 
C29 C30 H30A 110.7 . . ? 
C31 C30 H30B 110.7 . . ? 
C29 C30 H30B 110.7 . . ? 
H30A C30 H30B 108.8 . . ? 
C30 C31 C32 104.2(3) . . ? 
C30 C31 H31A 110.9 . . ? 
C32 C31 H31A 110.9 . . ? 
C30 C31 H31B 110.9 . . ? 
C32 C31 H31B 110.9 . . ? 
H31A C31 H31B 108.9 . . ? 
O3 C32 C31 105.5(3) . . ? 
O3 C32 H32A 110.6 . . ? 
C31 C32 H32A 110.6 . . ? 
O3 C32 H32B 110.6 . . ? 
C31 C32 H32B 110.6 . . ? 
H32A C32 H32B 108.8 . . ? 
F8 C33 F7 107.0(4) . . ? 
F8 C33 F9 105.0(4) . . ? 
F7 C33 F9 104.6(4) . . ? 
F8 C33 C34 112.7(4) . . ? 
F7 C33 C34 112.9(4) . . ? 
F9 C33 C34 113.9(4) . . ? 
C39 C34 C35 119.6(4) . . ? 
C39 C34 C33 121.5(4) . . ? 
C35 C34 C33 118.9(4) . . ? 
C34 C35 C36 120.2(4) . . ? 
C34 C35 H35 119.9 . . ? 
C36 C35 H35 119.9 . . ? 
C35 C36 C37 120.4(4) . . ? 
C35 C36 H36 119.8 . . ? 
C37 C36 H36 119.8 . . ? 
C36 C37 C38 119.3(3) . . ? 
C36 C37 N3 120.2(3) . . ? 
C38 C37 N3 120.4(3) . . ? 
C39 C38 C37 119.5(4) . . ? 
C39 C38 H38 120.3 . . ? 
C37 C38 H38 120.3 . . ? 
C34 C39 C38 121.0(4) . . ? 
C34 C39 H39 119.5 . . ? 
C38 C39 H39 119.5 . . ? 
N3 C40 C41 127.4(3) . . ? 
N3 C40 H40 116.3 . . ? 
C41 C40 H40 116.3 . . ? 
C42 C41 C45 119.4(3) . 2_755 ? 
C42 C41 C40 117.2(3) . . ? 
C45 C41 C40 123.4(3) 2_755 . ? 
C43 C42 C41 120.8(4) . . ? 
C43 C42 H42 119.6 . . ? 
C41 C42 H42 119.6 . . ? 
C42 C43 C44 119.5(3) . . ? 
C42 C43 H43 120.3 . . ? 
C44 C43 H43 120.3 . . ? 
C46 C44 C43 120.9(3) 2_755 . ? 
C46 C44 H44 119.6 2_755 . ? 
C43 C44 H44 119.6 . . ? 
O4 C45 C46 119.8(3) . . ? 
O4 C45 C41 122.2(3) . 2_755 ? 
C46 C45 C41 118.0(3) . 2_755 ? 
C44 C46 C45 121.4(4) 2_755 . ? 
C44 C46 H46 119.3 2_755 . ? 
C45 C46 H46 119.3 . . ? 
O5 C47 C48 105.4(4) . . ? 
O5 C47 H47A 110.7 . . ? 
C48 C47 H47A 110.7 . . ? 
O5 C47 H47B 110.7 . . ? 
C48 C47 H47B 110.7 . . ? 
H47A C47 H47B 108.8 . . ? 
C48 C48 C47 105.3(3) 2_755 . ? 
C48 C48 H48A 110.7 2_755 . ? 
C47 C48 H48A 110.7 . . ? 
C48 C48 H48B 110.7 2_755 . ? 
C47 C48 H48B 110.7 . . ? 
H48A C48 H48B 108.8 . . ? 
  
_diffrn_measured_fraction_theta_max    0.998 
_diffrn_reflns_theta_full              25.55 
_diffrn_measured_fraction_theta_full   0.998 
_refine_diff_density_max    0.559 
_refine_diff_density_min   -0.353 
_refine_diff_density_rms    0.066 


  
data_3c 
  
_audit_creation_method            SHELXL-97 
_chemical_name_systematic 
; 
 ? 
; 
_chemical_name_common             ? 
_chemical_melting_point           ? 
_chemical_formula_moiety          ? 
_chemical_formula_sum 
 'C32 H32 Cl N2 O3 V' 
_chemical_formula_weight          578.99 
  
loop_ 
 _atom_type_symbol 
 _atom_type_description 
 _atom_type_scat_dispersion_real 
 _atom_type_scat_dispersion_imag 
 _atom_type_scat_source 
 'C'  'C'   0.0033   0.0016 
 'International Tables Vol C Tables 4.2.6.8 and 6.1.1.4' 
 'H'  'H'   0.0000   0.0000 
 'International Tables Vol C Tables 4.2.6.8 and 6.1.1.4' 
 'N'  'N'   0.0061   0.0033 
 'International Tables Vol C Tables 4.2.6.8 and 6.1.1.4' 
 'O'  'O'   0.0106   0.0060 
 'International Tables Vol C Tables 4.2.6.8 and 6.1.1.4' 
 'Cl'  'Cl'   0.1484   0.1585 
 'International Tables Vol C Tables 4.2.6.8 and 6.1.1.4' 
 'V'  'V'   0.3005   0.5294 
 'International Tables Vol C Tables 4.2.6.8 and 6.1.1.4' 
  
_symmetry_cell_setting            Monoclinic 
_symmetry_space_group_name_H-M    P2(1)/n 
  
loop_ 
 _symmetry_equiv_pos_as_xyz 
 'x, y, z' 
 '-x+1/2, y+1/2, -z+1/2' 
 '-x, -y, -z' 
 'x-1/2, -y-1/2, z-1/2' 
  
_cell_length_a                    12.3342(7) 
_cell_length_b                    13.3442(7) 
_cell_length_c                    17.9276(10) 
_cell_angle_alpha                 90.00 
_cell_angle_beta                  103.0480(10) 
_cell_angle_gamma                 90.00 
_cell_volume                      2874.5(3) 
_cell_formula_units_Z             4 
_cell_measurement_temperature     187(2) 
_cell_measurement_reflns_used     6090 
_cell_measurement_theta_min       2.26 
_cell_measurement_theta_max       25.50 
  
_exptl_crystal_description        ? 
_exptl_crystal_colour             ? 
_exptl_crystal_size_max           0.34 
_exptl_crystal_size_mid           0.24 
_exptl_crystal_size_min           0.15 
_exptl_crystal_density_meas       ?
_exptl_crystal_density_diffrn     1.338 
_exptl_crystal_density_method     'not measured' 
_exptl_crystal_F_000              1208 
_exptl_absorpt_coefficient_mu     0.473 
_exptl_absorpt_correction_type    Multi-scan 
_exptl_absorpt_correction_T_min   0.8541 
_exptl_absorpt_correction_T_max   0.9341 
_exptl_absorpt_process_details    ? 
  
_exptl_special_details 
; 
 ? 
; 
  
_diffrn_ambient_temperature       187(2) 
_diffrn_radiation_wavelength      0.71073 
_diffrn_radiation_type            MoK\a 
_diffrn_radiation_source          'fine-focus sealed tube' 
_diffrn_radiation_monochromator   graphite 
_diffrn_measurement_device_type   'CCD area detector' 
_diffrn_measurement_method        'phi and omega scans' 
_diffrn_detector_area_resol_mean  ? 
_diffrn_standards_number          ? 
_diffrn_standards_interval_count  ? 
_diffrn_standards_interval_time   ? 
_diffrn_standards_decay_%         ? 
_diffrn_reflns_number             15120 
_diffrn_reflns_av_R_equivalents   0.0201 
_diffrn_reflns_av_sigmaI/netI     0.0229 
_diffrn_reflns_limit_h_min        -14 
_diffrn_reflns_limit_h_max        12 
_diffrn_reflns_limit_k_min        -11 
_diffrn_reflns_limit_k_max        16 
_diffrn_reflns_limit_l_min        -21 
_diffrn_reflns_limit_l_max        21 
_diffrn_reflns_theta_min          1.83 
_diffrn_reflns_theta_max          25.53 
_reflns_number_total              5331 
_reflns_number_gt                 4499 
_reflns_threshold_expression      >2sigma(I) 
  
_computing_data_collection        'Bruker SMART' 
_computing_cell_refinement        'Bruker SMART' 
_computing_data_reduction         'Bruker SAINT' 
_computing_structure_solution     'SHELXS-97 (Sheldrick, 1990)' 
_computing_structure_refinement   'SHELXL-97 (Sheldrick, 1997)' 
_computing_molecular_graphics     'Bruker SHELXTL' 
_computing_publication_material   'Bruker SHELXTL' 
  
_refine_special_details 
; 
 Refinement of F^2^ against ALL reflections.  The weighted R-factor wR and 
 goodness of fit S are based on F^2^, conventional R-factors R are based 
 on F, with F set to zero for negative F^2^. The threshold expression of 
 F^2^ > 2sigma(F^2^) is used only for calculating R-factors(gt) etc. and is 
 not relevant to the choice of reflections for refinement.  R-factors based 
 on F^2^ are statistically about twice as large as those based on F, and R- 
 factors based on ALL data will be even larger. 
; 
  
_refine_ls_structure_factor_coef  Fsqd 
_refine_ls_matrix_type            full 
_refine_ls_weighting_scheme       calc 
_refine_ls_weighting_details 
 'calc w=1/[\s^2^(Fo^2^)+(0.1000P)^2^+0.0000P] where P=(Fo^2^+2Fc^2^)/3' 
_atom_sites_solution_primary      direct 
_atom_sites_solution_secondary    difmap 
_atom_sites_solution_hydrogens    geom 
_refine_ls_hydrogen_treatment     constr 
_refine_ls_extinction_method      none 
_refine_ls_extinction_coef        ? 
_refine_ls_number_reflns          5331 
_refine_ls_number_parameters      354 
_refine_ls_number_restraints      0 
_refine_ls_R_factor_all           0.0510 
_refine_ls_R_factor_gt            0.0426 
_refine_ls_wR_factor_ref          0.1433 
_refine_ls_wR_factor_gt           0.1330 
_refine_ls_goodness_of_fit_ref    1.101 
_refine_ls_restrained_S_all       1.101 
_refine_ls_shift/su_max           0.451 
_refine_ls_shift/su_mean          0.009 
  
loop_ 
 _atom_site_label 
 _atom_site_type_symbol 
 _atom_site_fract_x 
 _atom_site_fract_y 
 _atom_site_fract_z 
 _atom_site_U_iso_or_equiv 
 _atom_site_adp_type 
 _atom_site_occupancy 
 _atom_site_symmetry_multiplicity 
 _atom_site_calc_flag 
 _atom_site_refinement_flags 
 _atom_site_disorder_assembly 
 _atom_site_disorder_group 
V V -0.00513(3) 0.78468(3) 0.219602(17) 0.03444(15) Uani 1 1 d . . . 
Cl Cl -0.12513(5) 0.73823(5) 0.10477(3) 0.05096(19) Uani 1 1 d . . . 
N1 N 0.10320(15) 0.65991(13) 0.22208(9) 0.0406(4) Uani 1 1 d . . . 
N2 N -0.10768(12) 0.91205(13) 0.22490(9) 0.0351(4) Uani 1 1 d . . . 
O1 O -0.07846(12) 0.71214(11) 0.28533(8) 0.0451(4) Uani 1 1 d . . . 
O2 O 0.08745(11) 0.86714(11) 0.17309(8) 0.0403(3) Uani 1 1 d . . . 
O3 O 0.10335(11) 0.83076(12) 0.32444(7) 0.0439(4) Uani 1 1 d . . . 
C1 C 0.1023(2) 0.58148(17) 0.26485(12) 0.0464(5) Uani 1 1 d . . . 
H1 H 0.1566 0.5316 0.2630 0.056 Uiso 1 1 calc R . . 
C2 C 0.02800(19) 0.56165(17) 0.31480(12) 0.0475(5) Uani 1 1 d . . . 
C3 C 0.0408(2) 0.4703(2) 0.35530(14) 0.0647(7) Uani 1 1 d . . . 
H3 H 0.0974 0.4248 0.3492 0.078 Uiso 1 1 calc R . . 
C4 C -0.0276(3) 0.4460(2) 0.40360(16) 0.0786(10) Uani 1 1 d . . . 
H4 H -0.0186 0.3839 0.4302 0.094 Uiso 1 1 calc R . . 
C5 C -0.1093(3) 0.5122(3) 0.41334(15) 0.0744(9) Uani 1 1 d . . . 
H5 H -0.1557 0.4955 0.4472 0.089 Uiso 1 1 calc R . . 
C6 C -0.1244(2) 0.6018(2) 0.37470(12) 0.0564(7) Uani 1 1 d . . . 
H6 H -0.1807 0.6467 0.3825 0.068 Uiso 1 1 calc R . . 
C7 C -0.05724(18) 0.62802(18) 0.32357(11) 0.0449(5) Uani 1 1 d . . . 
C8 C 0.18783(19) 0.66121(15) 0.17852(11) 0.0435(5) Uani 1 1 d . . . 
C9 C 0.2991(2) 0.64486(18) 0.21372(12) 0.0502(6) Uani 1 1 d . . . 
H9 H 0.3198 0.6317 0.2671 0.060 Uiso 1 1 calc R . . 
C10 C 0.3797(2) 0.64785(19) 0.17092(14) 0.0563(6) Uani 1 1 d . . . 
H10 H 0.4554 0.6364 0.1954 0.068 Uiso 1 1 calc R . . 
C11 C 0.3516(2) 0.66735(19) 0.09272(14) 0.0566(6) Uani 1 1 d . . . 
C12 C 0.4386(3) 0.6671(2) 0.04491(17) 0.0783(9) Uani 1 1 d . . . 
H12A H 0.4319 0.6054 0.0146 0.118 Uiso 1 1 calc R . . 
H12B H 0.5130 0.6706 0.0787 0.118 Uiso 1 1 calc R . . 
H12C H 0.4271 0.7252 0.0105 0.118 Uiso 1 1 calc R . . 
C13 C 0.2409(2) 0.68462(19) 0.05912(14) 0.0584(7) Uani 1 1 d . . . 
H13 H 0.2203 0.6986 0.0058 0.070 Uiso 1 1 calc R . . 
C14 C 0.1589(2) 0.68216(19) 0.10089(12) 0.0524(6) Uani 1 1 d . . . 
H14 H 0.0834 0.6948 0.0764 0.063 Uiso 1 1 calc R . . 
C15 C 0.07003(16) 0.95368(15) 0.13774(10) 0.0353(4) Uani 1 1 d . . . 
C16 C 0.14125(17) 0.98516(17) 0.09100(11) 0.0431(5) Uani 1 1 d . . . 
H16 H 0.2009 0.9429 0.0854 0.052 Uiso 1 1 calc R . . 
C17 C 0.1267(2) 1.07496(18) 0.05346(12) 0.0495(6) Uani 1 1 d . . . 
H17 H 0.1757 1.0935 0.0218 0.059 Uiso 1 1 calc R . . 
C18 C 0.0414(2) 1.13952(18) 0.06091(13) 0.0509(6) Uani 1 1 d . . . 
H18 H 0.0323 1.2021 0.0350 0.061 Uiso 1 1 calc R . . 
C19 C -0.02954(18) 1.11145(17) 0.10630(12) 0.0442(5) Uani 1 1 d . . . 
H19 H -0.0878 1.1555 0.1117 0.053 Uiso 1 1 calc R . . 
C20 C -0.01789(16) 1.01902(16) 0.14496(11) 0.0366(4) Uani 1 1 d . . . 
C21 C -0.09763(15) 0.99555(16) 0.19002(11) 0.0374(5) Uani 1 1 d . . . 
H21 H -0.1487 1.0472 0.1947 0.045 Uiso 1 1 calc R . . 
C22 C -0.19638(16) 0.91111(16) 0.26592(11) 0.0390(5) Uani 1 1 d . . . 
C23 C -0.20427(17) 0.98607(18) 0.31810(12) 0.0470(5) Uani 1 1 d . . . 
H23 H -0.1502 1.0379 0.3282 0.056 Uiso 1 1 calc R . . 
C24 C -0.29170(19) 0.9851(2) 0.35556(13) 0.0537(6) Uani 1 1 d . . . 
H24 H -0.2964 1.0362 0.3916 0.064 Uiso 1 1 calc R . . 
C25 C -0.37171(18) 0.9108(2) 0.34114(13) 0.0525(6) Uani 1 1 d . . . 
C26 C -0.4693(2) 0.9121(3) 0.37975(17) 0.0729(9) Uani 1 1 d . . . 
H26A H -0.4522 0.8698 0.4256 0.109 Uiso 1 1 calc R . . 
H26B H -0.5358 0.8864 0.3442 0.109 Uiso 1 1 calc R . . 
H26C H -0.4828 0.9810 0.3944 0.109 Uiso 1 1 calc R . . 
C27 C -0.36237(18) 0.8368(2) 0.28875(14) 0.0528(6) Uani 1 1 d . . . 
H27 H -0.4170 0.7853 0.2782 0.063 Uiso 1 1 calc R . . 
C28 C -0.27546(17) 0.83565(17) 0.25131(12) 0.0453(5) Uani 1 1 d . . . 
H28 H -0.2702 0.7837 0.2161 0.054 Uiso 1 1 calc R . . 
C29 C 0.0643(2) 0.8677(3) 0.38930(14) 0.0798(10) Uani 1 1 d . . . 
H29A H 0.0097 0.8206 0.4027 0.096 Uiso 1 1 calc R . . 
H29B H 0.0280 0.9338 0.3774 0.096 Uiso 1 1 calc R . . 
C30 C 0.16150(18) 0.8767(2) 0.45282(13) 0.0608(7) Uani 1 1 d . . . 
H30A H 0.1706 0.8157 0.4851 0.073 Uiso 1 1 calc R . . 
H30B H 0.1543 0.9354 0.4851 0.073 Uiso 1 1 calc R . . 
C31 C 0.25865(17) 0.8894(2) 0.41584(12) 0.0504(6) Uani 1 1 d . . . 
H31A H 0.2742 0.9612 0.4093 0.060 Uiso 1 1 calc R . . 
H31B H 0.3263 0.8572 0.4469 0.060 Uiso 1 1 calc R . . 
C32 C 0.22215(18) 0.8386(2) 0.33991(13) 0.0607(7) Uani 1 1 d . . . 
H32A H 0.2451 0.8783 0.2994 0.073 Uiso 1 1 calc R . . 
H32B H 0.2561 0.7712 0.3415 0.073 Uiso 1 1 calc R . . 
  
loop_ 
 _atom_site_aniso_label 
 _atom_site_aniso_U_11 
 _atom_site_aniso_U_22 
 _atom_site_aniso_U_33 
 _atom_site_aniso_U_23 
 _atom_site_aniso_U_13 
 _atom_site_aniso_U_12 
V 0.0365(2) 0.0389(2) 0.0280(2) 0.00241(13) 0.00753(15) -0.00244(13) 
Cl 0.0580(4) 0.0552(4) 0.0344(3) -0.0019(2) -0.0006(2) -0.0082(3) 
N1 0.0508(10) 0.0424(10) 0.0277(8) -0.0002(7) 0.0070(7) 0.0052(8) 
N2 0.0290(8) 0.0424(10) 0.0343(9) 0.0006(7) 0.0079(6) -0.0043(7) 
O1 0.0418(8) 0.0534(10) 0.0407(8) 0.0109(7) 0.0103(6) -0.0060(7) 
O2 0.0406(8) 0.0434(8) 0.0397(8) 0.0040(6) 0.0149(6) 0.0018(6) 
O3 0.0316(7) 0.0695(11) 0.0318(7) -0.0091(7) 0.0097(6) -0.0040(7) 
C1 0.0592(14) 0.0406(12) 0.0354(11) -0.0003(9) 0.0025(9) 0.0036(10) 
C2 0.0580(14) 0.0449(12) 0.0338(11) 0.0051(9) -0.0017(10) -0.0086(11) 
C3 0.0812(18) 0.0526(15) 0.0501(14) 0.0128(12) -0.0061(13) -0.0104(13) 
C4 0.097(2) 0.070(2) 0.0582(16) 0.0295(15) -0.0050(16) -0.0301(18) 
C5 0.0710(18) 0.093(2) 0.0521(15) 0.0276(15) -0.0006(13) -0.0359(17) 
C6 0.0484(13) 0.0755(18) 0.0415(12) 0.0121(12) 0.0026(10) -0.0224(12) 
C7 0.0468(12) 0.0537(14) 0.0292(10) 0.0047(9) -0.0023(9) -0.0201(10) 
C8 0.0584(13) 0.0391(12) 0.0340(11) -0.0020(9) 0.0126(9) 0.0112(10) 
C9 0.0598(14) 0.0518(14) 0.0387(12) -0.0014(10) 0.0104(10) 0.0166(11) 
C10 0.0581(14) 0.0599(16) 0.0529(14) -0.0016(12) 0.0164(11) 0.0154(12) 
C11 0.0735(17) 0.0489(14) 0.0553(14) 0.0000(11) 0.0308(12) 0.0106(12) 
C12 0.096(2) 0.074(2) 0.082(2) 0.0077(16) 0.0545(18) 0.0142(17) 
C13 0.0878(19) 0.0565(15) 0.0357(12) 0.0042(11) 0.0239(12) 0.0141(14) 
C14 0.0639(15) 0.0558(14) 0.0375(12) 0.0023(10) 0.0116(10) 0.0149(12) 
C15 0.0361(10) 0.0395(11) 0.0292(10) -0.0029(8) 0.0049(8) -0.0082(8) 
C16 0.0437(11) 0.0512(13) 0.0370(11) -0.0035(10) 0.0148(9) -0.0083(10) 
C17 0.0568(14) 0.0533(14) 0.0415(12) 0.0032(10) 0.0178(10) -0.0161(11) 
C18 0.0612(14) 0.0468(13) 0.0451(12) 0.0097(10) 0.0129(11) -0.0090(11) 
C19 0.0465(12) 0.0438(12) 0.0412(11) 0.0034(10) 0.0078(9) -0.0021(10) 
C20 0.0340(10) 0.0417(11) 0.0332(10) -0.0008(8) 0.0058(8) -0.0060(8) 
C21 0.0315(10) 0.0436(12) 0.0363(10) -0.0005(9) 0.0061(8) -0.0010(8) 
C22 0.0307(10) 0.0489(12) 0.0374(11) 0.0065(9) 0.0080(8) 0.0010(9) 
C23 0.0400(11) 0.0534(13) 0.0488(12) -0.0024(10) 0.0125(10) -0.0012(10) 
C24 0.0488(13) 0.0662(16) 0.0496(13) -0.0001(12) 0.0183(10) 0.0105(12) 
C25 0.0351(11) 0.0728(17) 0.0523(13) 0.0197(12) 0.0151(10) 0.0118(11) 
C26 0.0491(14) 0.103(2) 0.0766(18) 0.0323(17) 0.0349(13) 0.0194(15) 
C27 0.0342(11) 0.0672(16) 0.0571(14) 0.0142(12) 0.0104(10) -0.0079(11) 
C28 0.0368(11) 0.0541(14) 0.0445(12) 0.0023(10) 0.0084(9) -0.0083(10) 
C29 0.0443(14) 0.154(3) 0.0441(14) -0.0356(17) 0.0165(11) -0.0113(16) 
C30 0.0429(13) 0.098(2) 0.0409(13) -0.0132(13) 0.0092(10) -0.0029(13) 
C31 0.0335(11) 0.0702(16) 0.0453(12) -0.0079(11) 0.0042(9) -0.0027(10) 
C32 0.0313(11) 0.103(2) 0.0490(13) -0.0170(14) 0.0123(10) -0.0071(12) 
  
_geom_special_details 
; 
 All esds (except the esd in the dihedral angle between two l.s. planes) 
 are estimated using the full covariance matrix.  The cell esds are taken 
 into account individually in the estimation of esds in distances, angles 
 and torsion angles; correlations between esds in cell parameters are only 
 used when they are defined by crystal symmetry.  An approximate (isotropic) 
 treatment of cell esds is used for estimating esds involving l.s. planes. 
; 
  
loop_ 
 _geom_bond_atom_site_label_1 
 _geom_bond_atom_site_label_2 
 _geom_bond_distance 
 _geom_bond_site_symmetry_2 
 _geom_bond_publ_flag 
V O1 1.9038(14) . ? 
V O2 1.9079(14) . ? 
V N1 2.1290(18) . ? 
V N2 2.1336(17) . ? 
V O3 2.1366(13) . ? 
V Cl 2.3317(6) . ? 
N1 C1 1.299(3) . ? 
N1 C8 1.438(3) . ? 
N2 C21 1.297(3) . ? 
N2 C22 1.450(2) . ? 
O1 C7 1.311(3) . ? 
O2 C15 1.312(2) . ? 
O3 C32 1.432(2) . ? 
O3 C29 1.442(3) . ? 
C1 C2 1.443(3) . ? 
C1 H1 0.9500 . ? 
C2 C7 1.410(3) . ? 
C2 C3 1.409(3) . ? 
C3 C4 1.377(4) . ? 
C3 H3 0.9500 . ? 
C4 C5 1.380(5) . ? 
C4 H4 0.9500 . ? 
C5 C6 1.374(4) . ? 
C5 H5 0.9500 . ? 
C6 C7 1.411(3) . ? 
C6 H6 0.9500 . ? 
C8 C14 1.385(3) . ? 
C8 C9 1.392(3) . ? 
C9 C10 1.387(3) . ? 
C9 H9 0.9500 . ? 
C10 C11 1.390(3) . ? 
C10 H10 0.9500 . ? 
C11 C13 1.381(4) . ? 
C11 C12 1.517(3) . ? 
C12 H12A 0.9800 . ? 
C12 H12B 0.9800 . ? 
C12 H12C 0.9800 . ? 
C13 C14 1.389(3) . ? 
C13 H13 0.9500 . ? 
C14 H14 0.9500 . ? 
C15 C16 1.408(3) . ? 
C15 C20 1.420(3) . ? 
C16 C17 1.366(3) . ? 
C16 H16 0.9500 . ? 
C17 C18 1.389(3) . ? 
C17 H17 0.9500 . ? 
C18 C19 1.375(3) . ? 
C18 H18 0.9500 . ? 
C19 C20 1.406(3) . ? 
C19 H19 0.9500 . ? 
C20 C21 1.441(3) . ? 
C21 H21 0.9500 . ? 
C22 C28 1.385(3) . ? 
C22 C23 1.388(3) . ? 
C23 C24 1.393(3) . ? 
C23 H23 0.9500 . ? 
C24 C25 1.381(4) . ? 
C24 H24 0.9500 . ? 
C25 C27 1.386(4) . ? 
C25 C26 1.518(3) . ? 
C26 H26A 0.9800 . ? 
C26 H26B 0.9800 . ? 
C26 H26C 0.9800 . ? 
C27 C28 1.387(3) . ? 
C27 H27 0.9500 . ? 
C28 H28 0.9500 . ? 
C29 C30 1.460(3) . ? 
C29 H29A 0.9900 . ? 
C29 H29B 0.9900 . ? 
C30 C31 1.504(3) . ? 
C30 H30A 0.9900 . ? 
C30 H30B 0.9900 . ? 
C31 C32 1.496(3) . ? 
C31 H31A 0.9900 . ? 
C31 H31B 0.9900 . ? 
C32 H32A 0.9900 . ? 
C32 H32B 0.9900 . ? 
  
loop_ 
 _geom_angle_atom_site_label_1 
 _geom_angle_atom_site_label_2 
 _geom_angle_atom_site_label_3 
 _geom_angle 
 _geom_angle_site_symmetry_1 
 _geom_angle_site_symmetry_3 
 _geom_angle_publ_flag 
O1 V O2 168.12(6) . . ? 
O1 V N1 88.46(7) . . ? 
O2 V N1 91.46(6) . . ? 
O1 V N2 90.47(6) . . ? 
O2 V N2 88.82(6) . . ? 
N1 V N2 176.08(6) . . ? 
O1 V O3 83.83(6) . . ? 
O2 V O3 84.30(6) . . ? 
N1 V O3 86.63(6) . . ? 
N2 V O3 89.51(6) . . ? 
O1 V Cl 96.65(5) . . ? 
O2 V Cl 95.20(5) . . ? 
N1 V Cl 94.64(5) . . ? 
N2 V Cl 89.23(5) . . ? 
O3 V Cl 178.65(5) . . ? 
C1 N1 C8 115.75(18) . . ? 
C1 N1 V 123.60(15) . . ? 
C8 N1 V 120.55(13) . . ? 
C21 N2 C22 114.66(17) . . ? 
C21 N2 V 122.73(13) . . ? 
C22 N2 V 122.59(13) . . ? 
C7 O1 V 133.83(15) . . ? 
C15 O2 V 132.08(13) . . ? 
C32 O3 C29 109.39(16) . . ? 
C32 O3 V 126.97(12) . . ? 
C29 O3 V 123.43(13) . . ? 
N1 C1 C2 127.3(2) . . ? 
N1 C1 H1 116.4 . . ? 
C2 C1 H1 116.4 . . ? 
C7 C2 C3 119.0(2) . . ? 
C7 C2 C1 123.2(2) . . ? 
C3 C2 C1 117.7(2) . . ? 
C4 C3 C2 121.0(3) . . ? 
C4 C3 H3 119.5 . . ? 
C2 C3 H3 119.5 . . ? 
C3 C4 C5 119.9(3) . . ? 
C3 C4 H4 120.1 . . ? 
C5 C4 H4 120.1 . . ? 
C6 C5 C4 120.9(3) . . ? 
C6 C5 H5 119.6 . . ? 
C4 C5 H5 119.6 . . ? 
C5 C6 C7 120.7(3) . . ? 
C5 C6 H6 119.7 . . ? 
C7 C6 H6 119.7 . . ? 
O1 C7 C2 123.05(19) . . ? 
O1 C7 C6 118.3(2) . . ? 
C2 C7 C6 118.6(2) . . ? 
C14 C8 C9 119.4(2) . . ? 
C14 C8 N1 119.6(2) . . ? 
C9 C8 N1 120.94(18) . . ? 
C10 C9 C8 120.1(2) . . ? 
C10 C9 H9 120.0 . . ? 
C8 C9 H9 120.0 . . ? 
C9 C10 C11 121.1(2) . . ? 
C9 C10 H10 119.4 . . ? 
C11 C10 H10 119.5 . . ? 
C13 C11 C10 117.9(2) . . ? 
C13 C11 C12 120.6(2) . . ? 
C10 C11 C12 121.5(3) . . ? 
C11 C12 H12A 109.5 . . ? 
C11 C12 H12B 109.5 . . ? 
H12A C12 H12B 109.5 . . ? 
C11 C12 H12C 109.5 . . ? 
H12A C12 H12C 109.5 . . ? 
H12B C12 H12C 109.5 . . ? 
C11 C13 C14 122.0(2) . . ? 
C11 C13 H13 119.0 . . ? 
C14 C13 H13 119.0 . . ? 
C13 C14 C8 119.5(2) . . ? 
C13 C14 H14 120.2 . . ? 
C8 C14 H14 120.2 . . ? 
O2 C15 C16 119.61(19) . . ? 
O2 C15 C20 122.80(18) . . ? 
C16 C15 C20 117.58(19) . . ? 
C17 C16 C15 121.7(2) . . ? 
C17 C16 H16 119.2 . . ? 
C15 C16 H16 119.2 . . ? 
C16 C17 C18 121.0(2) . . ? 
C16 C17 H17 119.5 . . ? 
C18 C17 H17 119.5 . . ? 
C19 C18 C17 119.0(2) . . ? 
C19 C18 H18 120.5 . . ? 
C17 C18 H18 120.5 . . ? 
C18 C19 C20 121.5(2) . . ? 
C18 C19 H19 119.2 . . ? 
C20 C19 H19 119.2 . . ? 
C19 C20 C15 119.26(18) . . ? 
C19 C20 C21 117.40(19) . . ? 
C15 C20 C21 123.34(19) . . ? 
N2 C21 C20 127.47(19) . . ? 
N2 C21 H21 116.3 . . ? 
C20 C21 H21 116.3 . . ? 
C28 C22 C23 119.87(19) . . ? 
C28 C22 N2 119.36(19) . . ? 
C23 C22 N2 120.76(18) . . ? 
C22 C23 C24 119.8(2) . . ? 
C22 C23 H23 120.1 . . ? 
C24 C23 H23 120.1 . . ? 
C25 C24 C23 121.0(2) . . ? 
C25 C24 H24 119.5 . . ? 
C23 C24 H24 119.5 . . ? 
C27 C25 C24 118.2(2) . . ? 
C27 C25 C26 120.9(2) . . ? 
C24 C25 C26 120.8(3) . . ? 
C25 C26 H26A 109.5 . . ? 
C25 C26 H26B 109.5 . . ? 
H26A C26 H26B 109.5 . . ? 
C25 C26 H26C 109.5 . . ? 
H26A C26 H26C 109.5 . . ? 
H26B C26 H26C 109.5 . . ? 
C25 C27 C28 121.8(2) . . ? 
C25 C27 H27 119.1 . . ? 
C28 C27 H27 119.1 . . ? 
C22 C28 C27 119.3(2) . . ? 
C22 C28 H28 120.4 . . ? 
C27 C28 H28 120.4 . . ? 
O3 C29 C30 106.99(19) . . ? 
O3 C29 H29A 110.3 . . ? 
C30 C29 H29A 110.3 . . ? 
O3 C29 H29B 110.3 . . ? 
C30 C29 H29B 110.3 . . ? 
H29A C29 H29B 108.6 . . ? 
C29 C30 C31 105.13(18) . . ? 
C29 C30 H30A 110.7 . . ? 
C31 C30 H30A 110.7 . . ? 
C29 C30 H30B 110.7 . . ? 
C31 C30 H30B 110.7 . . ? 
H30A C30 H30B 108.8 . . ? 
C32 C31 C30 104.10(18) . . ? 
C32 C31 H31A 110.9 . . ? 
C30 C31 H31A 110.9 . . ? 
C32 C31 H31B 110.9 . . ? 
C30 C31 H31B 110.9 . . ? 
H31A C31 H31B 109.0 . . ? 
O3 C32 C31 107.09(17) . . ? 
O3 C32 H32A 110.3 . . ? 
C31 C32 H32A 110.3 . . ? 
O3 C32 H32B 110.3 . . ? 
C31 C32 H32B 110.3 . . ? 
H32A C32 H32B 108.6 . . ? 
  
_diffrn_measured_fraction_theta_max    0.996 
_diffrn_reflns_theta_full              25.53 
_diffrn_measured_fraction_theta_full   0.996 
_refine_diff_density_max    0.568 
_refine_diff_density_min   -0.325 
_refine_diff_density_rms    0.058 


  
data_3e 
  
_audit_creation_method            SHELXL-97 
_chemical_name_systematic 
; 
 ? 
; 
_chemical_name_common             ? 
_chemical_melting_point           ? 
_chemical_formula_moiety          ? 
_chemical_formula_sum 
 'C42 H52 Cl N2 O3 V' 
_chemical_formula_weight          719.25 
  
loop_ 
 _atom_type_symbol 
 _atom_type_description 
 _atom_type_scat_dispersion_real 
 _atom_type_scat_dispersion_imag 
 _atom_type_scat_source 
 'C'  'C'   0.0033   0.0016 
 'International Tables Vol C Tables 4.2.6.8 and 6.1.1.4' 
 'H'  'H'   0.0000   0.0000 
 'International Tables Vol C Tables 4.2.6.8 and 6.1.1.4' 
 'N'  'N'   0.0061   0.0033 
 'International Tables Vol C Tables 4.2.6.8 and 6.1.1.4' 
 'O'  'O'   0.0106   0.0060 
 'International Tables Vol C Tables 4.2.6.8 and 6.1.1.4' 
 'Cl'  'Cl'   0.1484   0.1585 
 'International Tables Vol C Tables 4.2.6.8 and 6.1.1.4' 
 'V'  'V'   0.3005   0.5294 
 'International Tables Vol C Tables 4.2.6.8 and 6.1.1.4' 
  
_symmetry_cell_setting            Monoclinic 
_symmetry_space_group_name_H-M    P2(1)/n 
  
loop_ 
 _symmetry_equiv_pos_as_xyz 
 'x, y, z' 
 '-x+1/2, y+1/2, -z+1/2' 
 '-x, -y, -z' 
 'x-1/2, -y-1/2, z-1/2' 
  
_cell_length_a                    11.6439(8) 
_cell_length_b                    22.3741(16) 
_cell_length_c                    14.8894(11) 
_cell_angle_alpha                 90.00 
_cell_angle_beta                  93.753(2) 
_cell_angle_gamma                 90.00 
_cell_volume                      3870.7(5) 
_cell_formula_units_Z             4 
_cell_measurement_temperature     187(2) 
_cell_measurement_reflns_used     1869 
_cell_measurement_theta_min       2.29 
_cell_measurement_theta_max       20.78 
  
_exptl_crystal_description        ? 
_exptl_crystal_colour             ? 
_exptl_crystal_size_max           0.15 
_exptl_crystal_size_mid           0.14 
_exptl_crystal_size_min           0.06 
_exptl_crystal_density_meas       ? 
_exptl_crystal_density_diffrn     1.234 
_exptl_crystal_density_method     'not measured' 
_exptl_crystal_F_000              1528 
_exptl_absorpt_coefficient_mu     0.365 
_exptl_absorpt_correction_type    multi-scan 
_exptl_absorpt_correction_T_min   0.9463 
_exptl_absorpt_correction_T_max   0.9784 
_exptl_absorpt_process_details    ? 
  
_exptl_special_details 
; 
 ? 
; 
  
_diffrn_ambient_temperature       187(2) 
_diffrn_radiation_wavelength      0.71073 
_diffrn_radiation_type            MoK\a 
_diffrn_radiation_source          'fine-focus sealed tube' 
_diffrn_radiation_monochromator   graphite 
_diffrn_measurement_device_type   'CCD area detector' 
_diffrn_measurement_method        'phi and omega scans' 
_diffrn_detector_area_resol_mean  ? 
_diffrn_standards_number          ? 
_diffrn_standards_interval_count  ? 
_diffrn_standards_interval_time   ? 
_diffrn_standards_decay_%         ? 
_diffrn_reflns_number             20510 
_diffrn_reflns_av_R_equivalents   0.0717 
_diffrn_reflns_av_sigmaI/netI     0.0872 
_diffrn_reflns_limit_h_min        -12 
_diffrn_reflns_limit_h_max        14 
_diffrn_reflns_limit_k_min        -26 
_diffrn_reflns_limit_k_max        25 
_diffrn_reflns_limit_l_min        -17 
_diffrn_reflns_limit_l_max        13 
_diffrn_reflns_theta_min          1.65 
_diffrn_reflns_theta_max          25.35 
_reflns_number_total              7073 
_reflns_number_gt                 4415 
_reflns_threshold_expression      >2sigma(I) 
  
_computing_data_collection        'Bruker SMART' 
_computing_cell_refinement        'Bruker SMART' 
_computing_data_reduction         'Bruker SAINT' 
_computing_structure_solution     'SHELXS-97 (Sheldrick, 1990)' 
_computing_structure_refinement   'SHELXL-97 (Sheldrick, 1997)' 
_computing_molecular_graphics     'Bruker SHELXTL' 
_computing_publication_material   'Bruker SHELXTL' 
  
_refine_special_details 
; 
 Refinement of F^2^ against ALL reflections.  The weighted R-factor wR and 
 goodness of fit S are based on F^2^, conventional R-factors R are based 
 on F, with F set to zero for negative F^2^. The threshold expression of 
 F^2^ > 2sigma(F^2^) is used only for calculating R-factors(gt) etc. and is 
 not relevant to the choice of reflections for refinement.  R-factors based 
 on F^2^ are statistically about twice as large as those based on F, and R- 
 factors based on ALL data will be even larger. 
; 
  
_refine_ls_structure_factor_coef  Fsqd 
_refine_ls_matrix_type            full 
_refine_ls_weighting_scheme       calc 
_refine_ls_weighting_details 
 'calc w=1/[\s^2^(Fo^2^)+(0.0586P)^2^+0.0000P] where P=(Fo^2^+2Fc^2^)/3' 
_atom_sites_solution_primary      direct 
_atom_sites_solution_secondary    difmap 
_atom_sites_solution_hydrogens    geom 
_refine_ls_hydrogen_treatment     constr 
_refine_ls_extinction_method      none 
_refine_ls_extinction_coef        ? 
_refine_ls_number_reflns          7073 
_refine_ls_number_parameters      450 
_refine_ls_number_restraints      0 
_refine_ls_R_factor_all           0.1061 
_refine_ls_R_factor_gt            0.0584 
_refine_ls_wR_factor_ref          0.1377 
_refine_ls_wR_factor_gt           0.1185 
_refine_ls_goodness_of_fit_ref    0.990 
_refine_ls_restrained_S_all       0.990 
_refine_ls_shift/su_max           0.001 
_refine_ls_shift/su_mean          0.000 
  
loop_ 
 _atom_site_label 
 _atom_site_type_symbol 
 _atom_site_fract_x 
 _atom_site_fract_y 
 _atom_site_fract_z 
 _atom_site_U_iso_or_equiv 
 _atom_site_adp_type 
 _atom_site_occupancy 
 _atom_site_symmetry_multiplicity 
 _atom_site_calc_flag 
 _atom_site_refinement_flags 
 _atom_site_disorder_assembly 
 _atom_site_disorder_group 
V1 V 0.61344(5) 0.23281(2) 0.73088(4) 0.02626(17) Uani 1 1 d . . . 
Cl1 Cl 0.68896(7) 0.21949(4) 0.87834(6) 0.0350(2) Uani 1 1 d . . . 
N1 N 0.6227(2) 0.13627(11) 0.70955(18) 0.0250(6) Uani 1 1 d . . . 
N2 N 0.6280(2) 0.32902(11) 0.74284(17) 0.0253(6) Uani 1 1 d . . . 
O1 O 0.5236(2) 0.23478(9) 0.61917(15) 0.0342(6) Uani 1 1 d . . . 
O2 O 0.75495(18) 0.23313(9) 0.67461(16) 0.0337(6) Uani 1 1 d . . . 
O3 O 0.44295(19) 0.23420(10) 0.78388(15) 0.0343(6) Uani 1 1 d . . . 
C1 C 0.5308(3) 0.20210(14) 0.5461(2) 0.0309(8) Uani 1 1 d . . . 
C2 C 0.5821(3) 0.14494(14) 0.5465(2) 0.0279(8) Uani 1 1 d . . . 
C3 C 0.5889(3) 0.11394(16) 0.4654(2) 0.0380(9) Uani 1 1 d . . . 
H3 H 0.6240 0.0756 0.4664 0.046 Uiso 1 1 calc R . . 
C4 C 0.5466(3) 0.13700(17) 0.3847(2) 0.0440(10) Uani 1 1 d . . . 
H4 H 0.5537 0.1157 0.3301 0.053 Uiso 1 1 calc R . . 
C5 C 0.4926(3) 0.19289(17) 0.3852(2) 0.0419(10) Uani 1 1 d . . . 
H5 H 0.4608 0.2093 0.3302 0.050 Uiso 1 1 calc R . . 
C6 C 0.4846(3) 0.22429(16) 0.4634(2) 0.0387(9) Uani 1 1 d . . . 
H6 H 0.4470 0.2620 0.4616 0.046 Uiso 1 1 calc R . . 
C7 C 0.6197(3) 0.11472(14) 0.6288(2) 0.0305(8) Uani 1 1 d . . . 
H7 H 0.6451 0.0746 0.6231 0.037 Uiso 1 1 calc R . . 
C8 C 0.6579(3) 0.09378(13) 0.7795(2) 0.0281(8) Uani 1 1 d . . . 
C9 C 0.7746(3) 0.08078(14) 0.7971(2) 0.0313(8) Uani 1 1 d . . . 
C10 C 0.8040(3) 0.04160(15) 0.8672(2) 0.0403(9) Uani 1 1 d . . . 
H10 H 0.8828 0.0318 0.8801 0.048 Uiso 1 1 calc R . . 
C11 C 0.7234(4) 0.01664(16) 0.9182(3) 0.0456(10) Uani 1 1 d . . . 
H11 H 0.7464 -0.0091 0.9668 0.055 Uiso 1 1 calc R . . 
C12 C 0.6081(3) 0.02906(15) 0.8987(2) 0.0412(10) Uani 1 1 d . . . 
H12 H 0.5522 0.0113 0.9340 0.049 Uiso 1 1 calc R . . 
C13 C 0.5727(3) 0.06701(14) 0.8286(2) 0.0347(9) Uani 1 1 d . . . 
C14 C 0.8690(3) 0.10738(15) 0.7439(2) 0.0373(9) Uani 1 1 d . . . 
H14 H 0.8330 0.1382 0.7024 0.045 Uiso 1 1 calc R . . 
C15 C 0.9236(4) 0.06031(19) 0.6864(3) 0.0655(13) Uani 1 1 d . . . 
H15A H 0.9576 0.0288 0.7252 0.098 Uiso 1 1 calc R . . 
H15B H 0.9838 0.0789 0.6527 0.098 Uiso 1 1 calc R . . 
H15C H 0.8646 0.0430 0.6441 0.098 Uiso 1 1 calc R . . 
C16 C 0.9614(3) 0.13820(19) 0.8044(3) 0.0601(12) Uani 1 1 d . . . 
H16A H 0.9255 0.1681 0.8417 0.090 Uiso 1 1 calc R . . 
H16B H 1.0166 0.1579 0.7672 0.090 Uiso 1 1 calc R . . 
H16C H 1.0015 0.1085 0.8433 0.090 Uiso 1 1 calc R . . 
C17 C 0.4457(3) 0.07696(16) 0.8026(3) 0.0455(10) Uani 1 1 d . . . 
H17 H 0.4368 0.1189 0.7800 0.055 Uiso 1 1 calc R . . 
C18 C 0.4044(3) 0.0351(2) 0.7251(3) 0.0675(13) Uani 1 1 d . . . 
H18A H 0.4517 0.0413 0.6738 0.101 Uiso 1 1 calc R . . 
H18B H 0.3237 0.0438 0.7069 0.101 Uiso 1 1 calc R . . 
H18C H 0.4114 -0.0065 0.7453 0.101 Uiso 1 1 calc R . . 
C19 C 0.3672(3) 0.06965(19) 0.8797(3) 0.0653(13) Uani 1 1 d . . . 
H19A H 0.3673 0.0277 0.8989 0.098 Uiso 1 1 calc R . . 
H19B H 0.2887 0.0816 0.8595 0.098 Uiso 1 1 calc R . . 
H19C H 0.3950 0.0949 0.9303 0.098 Uiso 1 1 calc R . . 
C20 C 0.8302(3) 0.27446(14) 0.6556(2) 0.0282(8) Uani 1 1 d . . . 
C21 C 0.8148(3) 0.33527(13) 0.6757(2) 0.0254(7) Uani 1 1 d . . . 
C22 C 0.8994(3) 0.37644(16) 0.6546(2) 0.0389(9) Uani 1 1 d . . . 
H22 H 0.8892 0.4174 0.6688 0.047 Uiso 1 1 calc R . . 
C23 C 0.9969(3) 0.35921(16) 0.6139(2) 0.0401(9) Uani 1 1 d . . . 
H23 H 1.0532 0.3878 0.5995 0.048 Uiso 1 1 calc R . . 
C24 C 1.0109(3) 0.29881(16) 0.5945(2) 0.0389(9) Uani 1 1 d . . . 
H24 H 1.0780 0.2861 0.5668 0.047 Uiso 1 1 calc R . . 
C25 C 0.9302(3) 0.25762(15) 0.6143(2) 0.0342(9) Uani 1 1 d . . . 
H25 H 0.9419 0.2168 0.5999 0.041 Uiso 1 1 calc R . . 
C26 C 0.7164(3) 0.35820(14) 0.7177(2) 0.0290(8) Uani 1 1 d . . . 
H26 H 0.7161 0.4001 0.7285 0.035 Uiso 1 1 calc R . . 
C27 C 0.5471(3) 0.36680(14) 0.7874(2) 0.0301(8) Uani 1 1 d . . . 
C28 C 0.4459(3) 0.38485(15) 0.7382(3) 0.0374(9) Uani 1 1 d . . . 
C29 C 0.3679(3) 0.41932(17) 0.7834(3) 0.0508(11) Uani 1 1 d . . . 
H29 H 0.2982 0.4317 0.7522 0.061 Uiso 1 1 calc R . . 
C30 C 0.3896(3) 0.43579(18) 0.8719(3) 0.0552(12) Uani 1 1 d . . . 
H30 H 0.3340 0.4581 0.9017 0.066 Uiso 1 1 calc R . . 
C31 C 0.4921(3) 0.41986(16) 0.9175(3) 0.0462(10) Uani 1 1 d . . . 
H31 H 0.5070 0.4326 0.9780 0.055 Uiso 1 1 calc R . . 
C32 C 0.5743(3) 0.38556(14) 0.8768(2) 0.0351(9) Uani 1 1 d . . . 
C33 C 0.4267(3) 0.37178(16) 0.6391(3) 0.0413(10) Uani 1 1 d . . . 
H33 H 0.4599 0.3314 0.6281 0.050 Uiso 1 1 calc R . . 
C34 C 0.2994(3) 0.37036(18) 0.6042(3) 0.0623(13) Uani 1 1 d . . . 
H34A H 0.2561 0.3448 0.6433 0.093 Uiso 1 1 calc R . . 
H34B H 0.2932 0.3545 0.5428 0.093 Uiso 1 1 calc R . . 
H34C H 0.2679 0.4110 0.6043 0.093 Uiso 1 1 calc R . . 
C35 C 0.4904(3) 0.41723(17) 0.5825(3) 0.0526(11) Uani 1 1 d . . . 
H35A H 0.4591 0.4573 0.5914 0.079 Uiso 1 1 calc R . . 
H35B H 0.4799 0.4064 0.5187 0.079 Uiso 1 1 calc R . . 
H35C H 0.5726 0.4169 0.6014 0.079 Uiso 1 1 calc R . . 
C36 C 0.6896(3) 0.37345(16) 0.9275(2) 0.0397(9) Uani 1 1 d . . . 
H36 H 0.7312 0.3431 0.8925 0.048 Uiso 1 1 calc R . . 
C37 C 0.6775(4) 0.34800(19) 1.0225(2) 0.0589(12) Uani 1 1 d . . . 
H37A H 0.6419 0.3780 1.0597 0.088 Uiso 1 1 calc R . . 
H37B H 0.7538 0.3377 1.0498 0.088 Uiso 1 1 calc R . . 
H37C H 0.6292 0.3121 1.0185 0.088 Uiso 1 1 calc R . . 
C38 C 0.7635(3) 0.42994(16) 0.9340(3) 0.0508(11) Uani 1 1 d . . . 
H38A H 0.7739 0.4452 0.8734 0.076 Uiso 1 1 calc R . . 
H38B H 0.8388 0.4205 0.9640 0.076 Uiso 1 1 calc R . . 
H38C H 0.7252 0.4603 0.9689 0.076 Uiso 1 1 calc R . . 
C39 C 0.4178(3) 0.24143(18) 0.8784(2) 0.0445(10) Uani 1 1 d . . . 
H39A H 0.4599 0.2762 0.9054 0.053 Uiso 1 1 calc R . . 
H39B H 0.4405 0.2052 0.9134 0.053 Uiso 1 1 calc R . . 
C40 C 0.2904(4) 0.2512(3) 0.8777(4) 0.0956(19) Uani 1 1 d . . . 
H40A H 0.2566 0.2242 0.9217 0.115 Uiso 1 1 calc R . . 
H40B H 0.2740 0.2929 0.8945 0.115 Uiso 1 1 calc R . . 
C41 C 0.2434(4) 0.2395(3) 0.7929(4) 0.112(2) Uani 1 1 d . . . 
H41A H 0.1971 0.2742 0.7708 0.134 Uiso 1 1 calc R . . 
H41B H 0.1916 0.2045 0.7947 0.134 Uiso 1 1 calc R . . 
C42 C 0.3350(3) 0.22727(17) 0.7306(3) 0.0451(10) Uani 1 1 d . . . 
H42A H 0.3276 0.1862 0.7062 0.054 Uiso 1 1 calc R . . 
H42B H 0.3302 0.2559 0.6798 0.054 Uiso 1 1 calc R . . 
  
loop_ 
 _atom_site_aniso_label 
 _atom_site_aniso_U_11 
 _atom_site_aniso_U_22 
 _atom_site_aniso_U_33 
 _atom_site_aniso_U_23 
 _atom_site_aniso_U_13 
 _atom_site_aniso_U_12 
V1 0.0281(3) 0.0253(3) 0.0257(3) 0.0011(3) 0.0041(3) -0.0010(3) 
Cl1 0.0396(5) 0.0322(5) 0.0323(5) -0.0015(4) -0.0057(4) 0.0014(4) 
N1 0.0251(15) 0.0244(14) 0.0258(16) 0.0029(12) 0.0026(13) -0.0036(12) 
N2 0.0234(15) 0.0274(14) 0.0254(16) 0.0016(12) 0.0043(13) 0.0031(12) 
O1 0.0474(15) 0.0312(13) 0.0236(13) 0.0004(11) -0.0003(12) 0.0075(11) 
O2 0.0327(13) 0.0253(12) 0.0449(15) -0.0008(11) 0.0159(12) -0.0013(10) 
O3 0.0303(13) 0.0418(14) 0.0307(14) -0.0017(11) 0.0003(11) -0.0015(11) 
C1 0.029(2) 0.0318(19) 0.032(2) 0.0022(16) 0.0042(17) -0.0038(15) 
C2 0.0242(19) 0.0341(19) 0.0255(19) 0.0006(15) 0.0023(15) -0.0028(15) 
C3 0.041(2) 0.039(2) 0.034(2) -0.0086(18) 0.0034(18) -0.0012(17) 
C4 0.050(3) 0.054(3) 0.027(2) -0.0087(19) 0.0003(19) -0.007(2) 
C5 0.042(2) 0.057(3) 0.025(2) 0.0078(18) -0.0069(18) -0.0108(19) 
C6 0.041(2) 0.040(2) 0.035(2) 0.0047(18) -0.0024(19) 0.0012(17) 
C7 0.030(2) 0.0266(18) 0.035(2) 0.0003(16) 0.0035(17) -0.0029(15) 
C8 0.036(2) 0.0217(17) 0.0265(19) -0.0038(14) 0.0013(17) 0.0004(15) 
C9 0.039(2) 0.0241(17) 0.030(2) -0.0031(15) -0.0006(17) -0.0018(16) 
C10 0.044(2) 0.035(2) 0.041(2) 0.0036(18) -0.004(2) 0.0023(18) 
C11 0.064(3) 0.039(2) 0.033(2) 0.0108(18) 0.000(2) 0.006(2) 
C12 0.056(3) 0.0292(19) 0.039(2) 0.0054(17) 0.014(2) -0.0047(18) 
C13 0.043(2) 0.0265(18) 0.035(2) 0.0006(16) 0.0071(18) -0.0010(16) 
C14 0.039(2) 0.0289(19) 0.043(2) 0.0050(17) -0.0035(19) 0.0005(16) 
C15 0.075(3) 0.065(3) 0.060(3) -0.016(2) 0.030(3) -0.012(2) 
C16 0.052(3) 0.068(3) 0.060(3) -0.010(2) 0.000(2) -0.016(2) 
C17 0.042(2) 0.039(2) 0.057(3) 0.015(2) 0.011(2) -0.0043(18) 
C18 0.054(3) 0.080(3) 0.068(3) 0.004(3) -0.001(3) -0.021(2) 
C19 0.059(3) 0.059(3) 0.080(4) 0.019(3) 0.026(3) -0.001(2) 
C20 0.0298(19) 0.0308(19) 0.0237(18) -0.0005(15) 0.0001(15) -0.0003(16) 
C21 0.0249(18) 0.0280(17) 0.0234(19) 0.0035(14) 0.0020(15) 0.0009(15) 
C22 0.034(2) 0.034(2) 0.049(2) 0.0034(18) 0.0023(19) -0.0026(17) 
C23 0.033(2) 0.040(2) 0.048(2) 0.0059(18) 0.0081(19) -0.0099(17) 
C24 0.026(2) 0.050(2) 0.042(2) -0.0002(18) 0.0079(18) -0.0014(17) 
C25 0.033(2) 0.0356(19) 0.034(2) -0.0014(16) 0.0065(17) 0.0021(17) 
C26 0.036(2) 0.0221(17) 0.028(2) 0.0038(15) -0.0026(17) 0.0014(16) 
C27 0.029(2) 0.0231(17) 0.039(2) 0.0006(16) 0.0087(17) -0.0012(15) 
C28 0.026(2) 0.0287(19) 0.058(3) -0.0010(18) 0.0054(19) -0.0011(16) 
C29 0.029(2) 0.043(2) 0.081(3) -0.008(2) 0.006(2) 0.0050(18) 
C30 0.038(2) 0.047(2) 0.083(4) -0.014(2) 0.025(2) 0.006(2) 
C31 0.053(3) 0.040(2) 0.048(3) -0.0058(19) 0.022(2) 0.002(2) 
C32 0.039(2) 0.0296(19) 0.038(2) 0.0011(17) 0.0132(18) -0.0047(17) 
C33 0.028(2) 0.037(2) 0.057(3) 0.0016(19) -0.0110(19) 0.0025(16) 
C34 0.039(2) 0.051(3) 0.093(4) 0.008(2) -0.018(2) -0.004(2) 
C35 0.046(3) 0.059(3) 0.050(3) 0.006(2) -0.010(2) -0.006(2) 
C36 0.047(2) 0.039(2) 0.033(2) -0.0034(17) 0.0026(19) 0.0038(18) 
C37 0.083(3) 0.061(3) 0.033(2) 0.005(2) 0.005(2) 0.006(2) 
C38 0.049(3) 0.048(2) 0.054(3) -0.010(2) -0.004(2) -0.002(2) 
C39 0.039(2) 0.058(2) 0.039(2) -0.0061(19) 0.0150(19) -0.0062(19) 
C40 0.043(3) 0.170(6) 0.076(4) -0.019(4) 0.016(3) 0.022(3) 
C41 0.032(3) 0.232(8) 0.073(4) 0.012(5) 0.012(3) -0.005(4) 
C42 0.031(2) 0.055(2) 0.048(2) 0.003(2) -0.0098(19) -0.0037(19) 
  
_geom_special_details 
; 
 All esds (except the esd in the dihedral angle between two l.s. planes) 
 are estimated using the full covariance matrix.  The cell esds are taken 
 into account individually in the estimation of esds in distances, angles 
 and torsion angles; correlations between esds in cell parameters are only 
 used when they are defined by crystal symmetry.  An approximate (isotropic) 
 treatment of cell esds is used for estimating esds involving l.s. planes. 
; 
  
loop_ 
 _geom_bond_atom_site_label_1 
 _geom_bond_atom_site_label_2 
 _geom_bond_distance 
 _geom_bond_site_symmetry_2 
 _geom_bond_publ_flag 
V1 O2 1.897(2) . ? 
V1 O1 1.907(2) . ? 
V1 N2 2.166(3) . ? 
V1 O3 2.184(2) . ? 
V1 N1 2.187(2) . ? 
V1 Cl1 2.3303(10) . ? 
N1 C7 1.294(4) . ? 
N1 C8 1.449(4) . ? 
N2 C26 1.294(4) . ? 
N2 C27 1.457(4) . ? 
O1 C1 1.318(4) . ? 
O2 C20 1.317(4) . ? 
O3 C42 1.451(4) . ? 
O3 C39 1.464(4) . ? 
C1 C6 1.401(5) . ? 
C1 C2 1.411(4) . ? 
C2 C3 1.400(4) . ? 
C2 C7 1.442(4) . ? 
C3 C4 1.369(5) . ? 
C3 H3 0.9500 . ? 
C4 C5 1.400(5) . ? 
C4 H4 0.9500 . ? 
C5 C6 1.369(5) . ? 
C5 H5 0.9500 . ? 
C6 H6 0.9500 . ? 
C7 H7 0.9500 . ? 
C8 C9 1.398(4) . ? 
C8 C13 1.406(4) . ? 
C9 C10 1.388(5) . ? 
C9 C14 1.518(5) . ? 
C10 C11 1.365(5) . ? 
C10 H10 0.9500 . ? 
C11 C12 1.383(5) . ? 
C11 H11 0.9500 . ? 
C12 C13 1.387(5) . ? 
C12 H12 0.9500 . ? 
C13 C17 1.520(5) . ? 
C14 C16 1.522(5) . ? 
C14 C15 1.523(5) . ? 
C14 H14 1.0000 . ? 
C15 H15A 0.9800 . ? 
C15 H15B 0.9800 . ? 
C15 H15C 0.9800 . ? 
C16 H16A 0.9800 . ? 
C16 H16B 0.9800 . ? 
C16 H16C 0.9800 . ? 
C17 C19 1.523(5) . ? 
C17 C18 1.539(5) . ? 
C17 H17 1.0000 . ? 
C18 H18A 0.9800 . ? 
C18 H18B 0.9800 . ? 
C18 H18C 0.9800 . ? 
C19 H19A 0.9800 . ? 
C19 H19B 0.9800 . ? 
C19 H19C 0.9800 . ? 
C20 C25 1.404(4) . ? 
C20 C21 1.407(4) . ? 
C21 C22 1.399(4) . ? 
C21 C26 1.437(4) . ? 
C22 C23 1.377(5) . ? 
C22 H22 0.9500 . ? 
C23 C24 1.394(5) . ? 
C23 H23 0.9500 . ? 
C24 C25 1.362(4) . ? 
C24 H24 0.9500 . ? 
C25 H25 0.9500 . ? 
C26 H26 0.9500 . ? 
C27 C28 1.406(5) . ? 
C27 C32 1.412(5) . ? 
C28 C29 1.397(5) . ? 
C28 C33 1.506(5) . ? 
C29 C30 1.376(6) . ? 
C29 H29 0.9500 . ? 
C30 C31 1.380(5) . ? 
C30 H30 0.9500 . ? 
C31 C32 1.396(5) . ? 
C31 H31 0.9500 . ? 
C32 C36 1.521(5) . ? 
C33 C34 1.538(4) . ? 
C33 C35 1.542(5) . ? 
C33 H33 1.0000 . ? 
C34 H34A 0.9800 . ? 
C34 H34B 0.9800 . ? 
C34 H34C 0.9800 . ? 
C35 H35A 0.9800 . ? 
C35 H35B 0.9800 . ? 
C35 H35C 0.9800 . ? 
C36 C38 1.529(5) . ? 
C36 C37 1.540(5) . ? 
C36 H36 1.0000 . ? 
C37 H37A 0.9800 . ? 
C37 H37B 0.9800 . ? 
C37 H37C 0.9800 . ? 
C38 H38A 0.9800 . ? 
C38 H38B 0.9800 . ? 
C38 H38C 0.9800 . ? 
C39 C40 1.500(5) . ? 
C39 H39A 0.9900 . ? 
C39 H39B 0.9900 . ? 
C40 C41 1.367(6) . ? 
C40 H40A 0.9900 . ? 
C40 H40B 0.9900 . ? 
C41 C42 1.484(6) . ? 
C41 H41A 0.9900 . ? 
C41 H41B 0.9900 . ? 
C42 H42A 0.9900 . ? 
C42 H42B 0.9900 . ? 
  
loop_ 
 _geom_angle_atom_site_label_1 
 _geom_angle_atom_site_label_2 
 _geom_angle_atom_site_label_3 
 _geom_angle 
 _geom_angle_site_symmetry_1 
 _geom_angle_site_symmetry_3 
 _geom_angle_publ_flag 
O2 V1 O1 93.30(10) . . ? 
O2 V1 N2 88.11(10) . . ? 
O1 V1 N2 94.84(9) . . ? 
O2 V1 O3 174.88(10) . . ? 
O1 V1 O3 81.66(9) . . ? 
N2 V1 O3 91.39(9) . . ? 
O2 V1 N1 83.52(9) . . ? 
O1 V1 N1 85.73(9) . . ? 
N2 V1 N1 171.63(10) . . ? 
O3 V1 N1 96.95(9) . . ? 
O2 V1 Cl1 97.56(8) . . ? 
O1 V1 Cl1 167.58(8) . . ? 
N2 V1 Cl1 91.54(7) . . ? 
O3 V1 Cl1 87.55(6) . . ? 
N1 V1 Cl1 89.50(7) . . ? 
C7 N1 C8 114.3(3) . . ? 
C7 N1 V1 120.3(2) . . ? 
C8 N1 V1 123.9(2) . . ? 
C26 N2 C27 112.9(3) . . ? 
C26 N2 V1 122.5(2) . . ? 
C27 N2 V1 124.4(2) . . ? 
C1 O1 V1 130.3(2) . . ? 
C20 O2 V1 135.0(2) . . ? 
C42 O3 C39 108.5(3) . . ? 
C42 O3 V1 125.2(2) . . ? 
C39 O3 V1 126.3(2) . . ? 
O1 C1 C6 119.1(3) . . ? 
O1 C1 C2 123.3(3) . . ? 
C6 C1 C2 117.6(3) . . ? 
C3 C2 C1 119.5(3) . . ? 
C3 C2 C7 118.0(3) . . ? 
C1 C2 C7 122.3(3) . . ? 
C4 C3 C2 122.2(3) . . ? 
C4 C3 H3 118.9 . . ? 
C2 C3 H3 118.9 . . ? 
C3 C4 C5 117.9(3) . . ? 
C3 C4 H4 121.0 . . ? 
C5 C4 H4 121.0 . . ? 
C6 C5 C4 121.2(3) . . ? 
C6 C5 H5 119.4 . . ? 
C4 C5 H5 119.4 . . ? 
C5 C6 C1 121.5(3) . . ? 
C5 C6 H6 119.3 . . ? 
C1 C6 H6 119.3 . . ? 
N1 C7 C2 127.1(3) . . ? 
N1 C7 H7 116.5 . . ? 
C2 C7 H7 116.5 . . ? 
C9 C8 C13 121.6(3) . . ? 
C9 C8 N1 119.9(3) . . ? 
C13 C8 N1 118.5(3) . . ? 
C10 C9 C8 117.5(3) . . ? 
C10 C9 C14 119.3(3) . . ? 
C8 C9 C14 123.2(3) . . ? 
C11 C10 C9 122.1(3) . . ? 
C11 C10 H10 118.9 . . ? 
C9 C10 H10 118.9 . . ? 
C10 C11 C12 119.6(3) . . ? 
C10 C11 H11 120.2 . . ? 
C12 C11 H11 120.2 . . ? 
C11 C12 C13 121.2(3) . . ? 
C11 C12 H12 119.4 . . ? 
C13 C12 H12 119.4 . . ? 
C12 C13 C8 117.9(3) . . ? 
C12 C13 C17 121.2(3) . . ? 
C8 C13 C17 120.9(3) . . ? 
C9 C14 C16 112.1(3) . . ? 
C9 C14 C15 111.5(3) . . ? 
C16 C14 C15 110.0(3) . . ? 
C9 C14 H14 107.7 . . ? 
C16 C14 H14 107.7 . . ? 
C15 C14 H14 107.7 . . ? 
C14 C15 H15A 109.5 . . ? 
C14 C15 H15B 109.5 . . ? 
H15A C15 H15B 109.5 . . ? 
C14 C15 H15C 109.5 . . ? 
H15A C15 H15C 109.5 . . ? 
H15B C15 H15C 109.5 . . ? 
C14 C16 H16A 109.5 . . ? 
C14 C16 H16B 109.5 . . ? 
H16A C16 H16B 109.5 . . ? 
C14 C16 H16C 109.5 . . ? 
H16A C16 H16C 109.5 . . ? 
H16B C16 H16C 109.5 . . ? 
C13 C17 C19 114.4(3) . . ? 
C13 C17 C18 110.7(3) . . ? 
C19 C17 C18 109.0(3) . . ? 
C13 C17 H17 107.5 . . ? 
C19 C17 H17 107.5 . . ? 
C18 C17 H17 107.5 . . ? 
C17 C18 H18A 109.5 . . ? 
C17 C18 H18B 109.5 . . ? 
H18A C18 H18B 109.5 . . ? 
C17 C18 H18C 109.5 . . ? 
H18A C18 H18C 109.5 . . ? 
H18B C18 H18C 109.5 . . ? 
C17 C19 H19A 109.5 . . ? 
C17 C19 H19B 109.5 . . ? 
H19A C19 H19B 109.5 . . ? 
C17 C19 H19C 109.5 . . ? 
H19A C19 H19C 109.5 . . ? 
H19B C19 H19C 109.5 . . ? 
O2 C20 C25 119.2(3) . . ? 
O2 C20 C21 122.6(3) . . ? 
C25 C20 C21 118.2(3) . . ? 
C22 C21 C20 119.2(3) . . ? 
C22 C21 C26 117.1(3) . . ? 
C20 C21 C26 123.6(3) . . ? 
C23 C22 C21 121.8(3) . . ? 
C23 C22 H22 119.1 . . ? 
C21 C22 H22 119.1 . . ? 
C22 C23 C24 118.3(3) . . ? 
C22 C23 H23 120.9 . . ? 
C24 C23 H23 120.9 . . ? 
C25 C24 C23 121.3(3) . . ? 
C25 C24 H24 119.4 . . ? 
C23 C24 H24 119.4 . . ? 
C24 C25 C20 121.1(3) . . ? 
C24 C25 H25 119.4 . . ? 
C20 C25 H25 119.4 . . ? 
N2 C26 C21 128.2(3) . . ? 
N2 C26 H26 115.9 . . ? 
C21 C26 H26 115.9 . . ? 
C28 C27 C32 122.3(3) . . ? 
C28 C27 N2 118.3(3) . . ? 
C32 C27 N2 119.3(3) . . ? 
C29 C28 C27 117.2(4) . . ? 
C29 C28 C33 121.3(3) . . ? 
C27 C28 C33 121.3(3) . . ? 
C30 C29 C28 121.7(4) . . ? 
C30 C29 H29 119.2 . . ? 
C28 C29 H29 119.2 . . ? 
C29 C30 C31 120.0(4) . . ? 
C29 C30 H30 120.0 . . ? 
C31 C30 H30 120.0 . . ? 
C30 C31 C32 121.6(4) . . ? 
C30 C31 H31 119.2 . . ? 
C32 C31 H31 119.2 . . ? 
C31 C32 C27 117.0(3) . . ? 
C31 C32 C36 119.4(3) . . ? 
C27 C32 C36 123.5(3) . . ? 
C28 C33 C34 114.4(3) . . ? 
C28 C33 C35 111.2(3) . . ? 
C34 C33 C35 108.4(3) . . ? 
C28 C33 H33 107.5 . . ? 
C34 C33 H33 107.5 . . ? 
C35 C33 H33 107.5 . . ? 
C33 C34 H34A 109.5 . . ? 
C33 C34 H34B 109.5 . . ? 
H34A C34 H34B 109.5 . . ? 
C33 C34 H34C 109.5 . . ? 
H34A C34 H34C 109.5 . . ? 
H34B C34 H34C 109.5 . . ? 
C33 C35 H35A 109.5 . . ? 
C33 C35 H35B 109.5 . . ? 
H35A C35 H35B 109.5 . . ? 
C33 C35 H35C 109.5 . . ? 
H35A C35 H35C 109.5 . . ? 
H35B C35 H35C 109.5 . . ? 
C32 C36 C38 111.0(3) . . ? 
C32 C36 C37 113.0(3) . . ? 
C38 C36 C37 109.4(3) . . ? 
C32 C36 H36 107.7 . . ? 
C38 C36 H36 107.7 . . ? 
C37 C36 H36 107.7 . . ? 
C36 C37 H37A 109.5 . . ? 
C36 C37 H37B 109.5 . . ? 
H37A C37 H37B 109.5 . . ? 
C36 C37 H37C 109.5 . . ? 
H37A C37 H37C 109.5 . . ? 
H37B C37 H37C 109.5 . . ? 
C36 C38 H38A 109.5 . . ? 
C36 C38 H38B 109.5 . . ? 
H38A C38 H38B 109.5 . . ? 
C36 C38 H38C 109.5 . . ? 
H38A C38 H38C 109.5 . . ? 
H38B C38 H38C 109.5 . . ? 
O3 C39 C40 105.6(3) . . ? 
O3 C39 H39A 110.6 . . ? 
C40 C39 H39A 110.6 . . ? 
O3 C39 H39B 110.6 . . ? 
C40 C39 H39B 110.6 . . ? 
H39A C39 H39B 108.7 . . ? 
C41 C40 C39 108.3(4) . . ? 
C41 C40 H40A 110.0 . . ? 
C39 C40 H40A 110.0 . . ? 
C41 C40 H40B 110.0 . . ? 
C39 C40 H40B 110.0 . . ? 
H40A C40 H40B 108.4 . . ? 
C40 C41 C42 110.6(4) . . ? 
C40 C41 H41A 109.5 . . ? 
C42 C41 H41A 109.5 . . ? 
C40 C41 H41B 109.5 . . ? 
C42 C41 H41B 109.5 . . ? 
H41A C41 H41B 108.1 . . ? 
O3 C42 C41 105.7(3) . . ? 
O3 C42 H42A 110.6 . . ? 
C41 C42 H42A 110.6 . . ? 
O3 C42 H42B 110.6 . . ? 
C41 C42 H42B 110.6 . . ? 
H42A C42 H42B 108.7 . . ? 
  
_diffrn_measured_fraction_theta_max    0.999 
_diffrn_reflns_theta_full              25.35 
_diffrn_measured_fraction_theta_full   0.999 
_refine_diff_density_max    0.369 
_refine_diff_density_min   -0.264 
_refine_diff_density_rms    0.060 


data_3j
 

_audit_creation_method            SHELXL-97

_chemical_name_systematic

;

 ?

;

_chemical_name_common             ?

_chemical_melting_point           ?

_chemical_formula_moiety          ?

_chemical_formula_sum

 'C58 H83 Cl N2 O3 V'

_chemical_formula_weight          942.65

 

loop_

 _atom_type_symbol

 _atom_type_description

 _atom_type_scat_dispersion_real

 _atom_type_scat_dispersion_imag

 _atom_type_scat_source

 'C'  'C'   0.0033   0.0016

 'International Tables Vol C Tables 4.2.6.8 and 6.1.1.4'

 'H'  'H'   0.0000   0.0000

 'International Tables Vol C Tables 4.2.6.8 and 6.1.1.4'

 'N'  'N'   0.0061   0.0033

 'International Tables Vol C Tables 4.2.6.8 and 6.1.1.4'

 'O'  'O'   0.0106   0.0060

 'International Tables Vol C Tables 4.2.6.8 and 6.1.1.4'

 'Cl'  'Cl'   0.1484   0.1585

 'International Tables Vol C Tables 4.2.6.8 and 6.1.1.4'

 'V'  'V'   0.3005   0.5294

 'International Tables Vol C Tables 4.2.6.8 and 6.1.1.4'

 

_symmetry_cell_setting            Monoclinic

_symmetry_space_group_name_H-M    C2/c

 

loop_

 _symmetry_equiv_pos_as_xyz

 'x, y, z'

 '-x, y, -z+1/2'

 'x+1/2, y+1/2, z'

 '-x+1/2, y+1/2, -z+1/2'

 '-x, -y, -z'

 'x, -y, z-1/2'

 '-x+1/2, -y+1/2, -z'

 'x+1/2, -y+1/2, z-1/2'

 

_cell_length_a                    17.673(3)

_cell_length_b                    27.429(5)

_cell_length_c                    11.8280(19)

_cell_angle_alpha                 90.00

_cell_angle_beta                  93.019(4)

_cell_angle_gamma                 90.00

_cell_volume                      5725.8(17)

_cell_formula_units_Z             4

_cell_measurement_temperature     273(2)

_cell_measurement_reflns_used     972

_cell_measurement_theta_min       2.16

_cell_measurement_theta_max       17.70

 

_exptl_crystal_description        ?

_exptl_crystal_colour             ?

_exptl_crystal_size_max           ?

_exptl_crystal_size_mid           ?

_exptl_crystal_size_min           ?

_exptl_crystal_density_meas       0

_exptl_crystal_density_diffrn     1.094

_exptl_crystal_density_method     'not measured'

_exptl_crystal_F_000              2036

_exptl_absorpt_coefficient_mu     0.261

_exptl_absorpt_correction_type    none

_exptl_absorpt_correction_T_min   ?

_exptl_absorpt_correction_T_max   ?

_exptl_absorpt_process_details    ?

 

_exptl_special_details

;

 ?

;

 

_diffrn_ambient_temperature       273(2)

_diffrn_radiation_wavelength      0.71073

_diffrn_radiation_type            MoK\a

_diffrn_radiation_source          'fine-focus sealed tube'

_diffrn_radiation_monochromator   graphite

_diffrn_measurement_device_type   'CCD area detector'

_diffrn_measurement_method        'phi and omega scans'

_diffrn_detector_area_resol_mean  ?

_diffrn_standards_number          ?

_diffrn_standards_interval_count  ?

_diffrn_standards_interval_time   ?

_diffrn_standards_decay_%         ?

_diffrn_reflns_number             15902

_diffrn_reflns_av_R_equivalents   0.1547

_diffrn_reflns_av_sigmaI/netI     0.2247

_diffrn_reflns_limit_h_min        -21

_diffrn_reflns_limit_h_max        17

_diffrn_reflns_limit_k_min        -33

_diffrn_reflns_limit_k_max        33

_diffrn_reflns_limit_l_min        -13

_diffrn_reflns_limit_l_max        14

_diffrn_reflns_theta_min          1.37

_diffrn_reflns_theta_max          26.06

_reflns_number_total              5650

_reflns_number_gt                 2139

_reflns_threshold_expression      >2sigma(I)

 

_computing_data_collection        'Bruker SMART'

_computing_cell_refinement        'Bruker SMART'

_computing_data_reduction         'Bruker SAINT'

_computing_structure_solution     'SHELXS-97 (Sheldrick, 1990)'

_computing_structure_refinement   'SHELXL-97 (Sheldrick, 1997)'

_computing_molecular_graphics     'Bruker SHELXTL'

_computing_publication_material   'Bruker SHELXTL'

 

_refine_special_details

;

 Refinement of F^2^ against ALL reflections.  The weighted R-factor wR and

 goodness of fit S are based on F^2^, conventional R-factors R are based

 on F, with F set to zero for negative F^2^. The threshold expression of

 F^2^ > 2sigma(F^2^) is used only for calculating R-factors(gt) etc. and is

 not relevant to the choice of reflections for refinement.  R-factors based

 on F^2^ are statistically about twice as large as those based on F, and R-

 factors based on ALL data will be even larger.

;

 

_refine_ls_structure_factor_coef  Fsqd

_refine_ls_matrix_type            full

_refine_ls_weighting_scheme       calc

_refine_ls_weighting_details

 'calc w=1/[\s^2^(Fo^2^)+(0.1843P)^2^+0.0000P] where P=(Fo^2^+2Fc^2^)/3'

_atom_sites_solution_primary      direct

_atom_sites_solution_secondary    difmap

_atom_sites_solution_hydrogens    geom

_refine_ls_hydrogen_treatment     mixed

_refine_ls_extinction_method      SHELXL

_refine_ls_extinction_coef        0.0011(4)

_refine_ls_extinction_expression

 'Fc^*^=kFc[1+0.001xFc^2^\l^3^/sin(2\q)]^-1/4^'

_refine_ls_number_reflns          5650

_refine_ls_number_parameters      132

_refine_ls_number_restraints      0

_refine_ls_R_factor_all           0.2364

_refine_ls_R_factor_gt            0.1185

_refine_ls_wR_factor_ref          0.3802

_refine_ls_wR_factor_gt           0.3157

_refine_ls_goodness_of_fit_ref    0.995

_refine_ls_restrained_S_all       0.995

_refine_ls_shift/su_max           0.050

_refine_ls_shift/su_mean          0.007

 

loop_

 _atom_site_label

 _atom_site_type_symbol

 _atom_site_fract_x

 _atom_site_fract_y

 _atom_site_fract_z

 _atom_site_U_iso_or_equiv

 _atom_site_adp_type

 _atom_site_occupancy

 _atom_site_symmetry_multiplicity

 _atom_site_calc_flag

 _atom_site_refinement_flags

 _atom_site_disorder_assembly

 _atom_site_disorder_group

V V 0.0000 0.24323(6) 0.7500 0.0268(5) Uiso 1 2 d S . .

O O 0.0328(3) 0.19890(17) 0.8647(4) 0.0298(12) Uiso 1 1 d . . .

N N 0.1142(3) 0.2461(2) 0.7044(5) 0.0284(14) Uiso 1 1 d . . .

Cl Cl 0.0000 0.32568(12) 0.7500 0.0585(10) Uiso 1 2 d S . .

C1 C 0.0831(4) 0.1627(2) 0.8592(6) 0.0262(16) Uiso 1 1 d . . .

C6 C 0.0748(4) 0.1196(3) 0.9237(6) 0.0326(18) Uiso 1 1 d . . .

C5 C 0.1269(4) 0.0826(3) 0.9059(7) 0.0362(19) Uiso 1 1 d . . .

H5A H 0.1213 0.0538 0.9461 0.043 Uiso 1 1 calc R . .

C4 C 0.1859(4) 0.0846(3) 0.8346(7) 0.0349(19) Uiso 1 1 d . . .

C3 C 0.1954(4) 0.1277(3) 0.7806(6) 0.0308(18) Uiso 1 1 d . . .

H3A H 0.2368 0.1315 0.7361 0.037 Uiso 1 1 calc R . .

C2 C 0.1445(4) 0.1667(3) 0.7895(6) 0.0293(17) Uiso 1 1 d . . .

C7 C 0.1605(4) 0.2102(2) 0.7262(6) 0.0303(17) Uiso 1 1 d . . .

H7A H 0.2085 0.2127 0.6984 0.036 Uiso 1 1 calc R . .

C8 C 0.1502(4) 0.2888(3) 0.6582(6) 0.0317(18) Uiso 1 1 d . . .

C9 C 0.1359(5) 0.3008(3) 0.5441(7) 0.040(2) Uiso 1 1 d . . .

C10 C 0.1727(5) 0.3418(3) 0.5027(8) 0.057(3) Uiso 1 1 d . . .

H10A H 0.1651 0.3504 0.4269 0.069 Uiso 1 1 calc R . .

C11 C 0.2204(5) 0.3698(4) 0.5739(8) 0.058(3) Uiso 1 1 d . . .

H11A H 0.2447 0.3968 0.5452 0.070 Uiso 1 1 calc R . .

C12 C 0.2319(5) 0.3579(3) 0.6841(8) 0.053(2) Uiso 1 1 d . . .

H12A H 0.2644 0.3771 0.7297 0.063 Uiso 1 1 calc R . .

C13 C 0.1966(5) 0.3176(3) 0.7326(7) 0.040(2) Uiso 1 1 d . . .

C14 C 0.0130(5) 0.1138(3) 1.0092(7) 0.044(2) Uiso 1 1 d . . .

C15 C -0.0651(6) 0.1174(4) 0.9513(10) 0.083(4) Uiso 1 1 d . . .

H15A H -0.0702 0.1481 0.9125 0.124 Uiso 1 1 calc R . .

H15B H -0.1027 0.1151 1.0068 0.124 Uiso 1 1 calc R . .

H15C H -0.0721 0.0913 0.8977 0.124 Uiso 1 1 calc R . .

C16 C 0.0204(6) 0.0672(4) 1.0772(9) 0.080(3) Uiso 1 1 d . . .

H16A H 0.0681 0.0670 1.1199 0.120 Uiso 1 1 calc R . .

H16B H 0.0179 0.0397 1.0268 0.120 Uiso 1 1 calc R . .

H16C H -0.0201 0.0652 1.1280 0.120 Uiso 1 1 calc R . .

C17 C 0.0206(6) 0.1546(4) 1.0963(9) 0.077(3) Uiso 1 1 d . . .

H17A H 0.0650 0.1492 1.1450 0.115 Uiso 1 1 calc R . .

H17B H -0.0234 0.1550 1.1407 0.115 Uiso 1 1 calc R . .

H17C H 0.0250 0.1853 1.0583 0.115 Uiso 1 1 calc R . .

C18 C 0.2360(5) 0.0400(3) 0.8170(8) 0.048(2) Uiso 1 1 d . . .

C19 C 0.1885(6) -0.0003(4) 0.7604(9) 0.079(3) Uiso 1 1 d . . .

H19A H 0.1648 0.0117 0.6909 0.119 Uiso 1 1 calc R . .

H19B H 0.1502 -0.0105 0.8100 0.119 Uiso 1 1 calc R . .

H19C H 0.2204 -0.0275 0.7445 0.119 Uiso 1 1 calc R . .

C20 C 0.2688(6) 0.0200(4) 0.9308(9) 0.069(3) Uiso 1 1 d . . .

H20A H 0.3013 0.0441 0.9668 0.103 Uiso 1 1 calc R . .

H20B H 0.2973 -0.0091 0.9179 0.103 Uiso 1 1 calc R . .

H20C H 0.2281 0.0126 0.9787 0.103 Uiso 1 1 calc R . .

C21 C 0.3006(6) 0.0501(4) 0.7433(9) 0.080(3) Uiso 1 1 d . . .

H21A H 0.2815 0.0640 0.6729 0.120 Uiso 1 1 calc R . .

H21B H 0.3267 0.0203 0.7288 0.120 Uiso 1 1 calc R . .

H21C H 0.3350 0.0726 0.7809 0.120 Uiso 1 1 calc R . .

C22 C 0.2061(5) 0.3078(3) 0.8588(8) 0.050(2) Uiso 1 1 d . . .

H22A H 0.1700 0.2823 0.8778 0.060 Uiso 1 1 calc R . .

C23 C 0.2845(6) 0.2902(4) 0.8915(10) 0.083(4) Uiso 1 1 d . . .

H23A H 0.2907 0.2576 0.8640 0.125 Uiso 1 1 calc R . .

H23B H 0.2920 0.2905 0.9725 0.125 Uiso 1 1 calc R . .

H23C H 0.3209 0.3113 0.8591 0.125 Uiso 1 1 calc R . .

C24 C 0.1884(7) 0.3536(4) 0.9262(10) 0.094(4) Uiso 1 1 d . . .

H24A H 0.1373 0.3638 0.9075 0.141 Uiso 1 1 calc R . .

H24B H 0.2227 0.3792 0.9076 0.141 Uiso 1 1 calc R . .

H24C H 0.1942 0.3467 1.0057 0.141 Uiso 1 1 calc R . .

C25 C 0.0834(5) 0.2716(3) 0.4672(7) 0.046(2) Uiso 1 1 d . . .

H25A H 0.0652 0.2440 0.5110 0.055 Uiso 1 1 calc R . .

C26 C 0.1237(6) 0.2509(4) 0.3674(9) 0.072(3) Uiso 1 1 d . . .

H26A H 0.1620 0.2283 0.3945 0.109 Uiso 1 1 calc R . .

H26B H 0.1469 0.2770 0.3276 0.109 Uiso 1 1 calc R . .

H26C H 0.0878 0.2344 0.3173 0.109 Uiso 1 1 calc R . .

C27 C 0.0154(6) 0.3014(4) 0.4282(9) 0.079(3) Uiso 1 1 d . . .

H27A H -0.0089 0.3139 0.4929 0.118 Uiso 1 1 calc R . .

H27B H -0.0196 0.2813 0.3844 0.118 Uiso 1 1 calc R . .

H27C H 0.0313 0.3280 0.3825 0.118 Uiso 1 1 calc R . .

 

_geom_special_details

;

 All esds (except the esd in the dihedral angle between two l.s. planes)

 are estimated using the full covariance matrix.  The cell esds are taken

 into account individually in the estimation of esds in distances, angles

 and torsion angles; correlations between esds in cell parameters are only

 used when they are defined by crystal symmetry.  An approximate (isotropic)

 treatment of cell esds is used for estimating esds involving l.s. planes.

;

 

loop_

 _geom_bond_atom_site_label_1

 _geom_bond_atom_site_label_2

 _geom_bond_distance

 _geom_bond_site_symmetry_2

 _geom_bond_publ_flag

V O 1.890(5) . ?

V O 1.890(5) 2_556 ?

V N 2.117(6) . ?

V N 2.117(6) 2_556 ?

V Cl 2.261(4) . ?

O C1 1.337(8) . ?

N C7 1.298(8) . ?

N C8 1.454(9) . ?

C1 C2 1.400(10) . ?

C1 C6 1.419(9) . ?

C6 C5 1.396(10) . ?

C6 C14 1.535(11) . ?

C5 C4 1.376(10) . ?

C5 H5A 0.9300 . ?

C4 C3 1.357(10) . ?

C4 C18 1.532(11) . ?

C3 C2 1.404(10) . ?

C3 H3A 0.9300 . ?

C2 C7 1.444(9) . ?

C7 H7A 0.9300 . ?

C8 C9 1.399(10) . ?

C8 C13 1.412(10) . ?

C9 C10 1.400(11) . ?

C9 C25 1.497(11) . ?

C10 C11 1.390(12) . ?

C10 H10A 0.9300 . ?

C11 C12 1.349(12) . ?

C11 H11A 0.9300 . ?

C12 C13 1.407(11) . ?

C12 H12A 0.9300 . ?

C13 C22 1.517(11) . ?

C14 C16 1.514(12) . ?

C14 C15 1.512(12) . ?

C14 C17 1.521(12) . ?

C15 H15A 0.9600 . ?

C15 H15B 0.9600 . ?

C15 H15C 0.9600 . ?

C16 H16A 0.9600 . ?

C16 H16B 0.9600 . ?

C16 H16C 0.9600 . ?

C17 H17A 0.9600 . ?

C17 H17B 0.9600 . ?

C17 H17C 0.9600 . ?

C18 C21 1.499(13) . ?

C18 C19 1.521(12) . ?

C18 C20 1.538(12) . ?

C19 H19A 0.9600 . ?

C19 H19B 0.9600 . ?

C19 H19C 0.9600 . ?

C20 H20A 0.9600 . ?

C20 H20B 0.9600 . ?

C20 H20C 0.9600 . ?

C21 H21A 0.9600 . ?

C21 H21B 0.9600 . ?

C21 H21C 0.9600 . ?

C22 C23 1.499(13) . ?

C22 C24 1.530(14) . ?

C22 H22A 0.9800 . ?

C23 H23A 0.9600 . ?

C23 H23B 0.9600 . ?

C23 H23C 0.9600 . ?

C24 H24A 0.9600 . ?

C24 H24B 0.9600 . ?

C24 H24C 0.9600 . ?

C25 C27 1.506(12) . ?

C25 C26 1.520(12) . ?

C25 H25A 0.9800 . ?

C26 H26A 0.9600 . ?

C26 H26B 0.9600 . ?

C26 H26C 0.9600 . ?

C27 H27A 0.9600 . ?

C27 H27B 0.9600 . ?

C27 H27C 0.9600 . ?

 

loop_

 _geom_angle_atom_site_label_1

 _geom_angle_atom_site_label_2

 _geom_angle_atom_site_label_3

 _geom_angle

 _geom_angle_site_symmetry_1

 _geom_angle_site_symmetry_3

 _geom_angle_publ_flag

O V O 99.9(3) . 2_556 ?

O V N 86.9(2) . . ?

O V N 95.8(2) 2_556 . ?

O V N 95.8(2) . 2_556 ?

O V N 86.9(2) 2_556 2_556 ?

N V N 175.7(3) . 2_556 ?

O V Cl 130.05(15) . . ?

O V Cl 130.05(15) 2_556 . ?

N V Cl 87.86(16) . . ?

N V Cl 87.85(16) 2_556 . ?

C1 O V 128.5(5) . . ?

C7 N C8 113.8(6) . . ?

C7 N V 121.3(5) . . ?

C8 N V 124.6(4) . . ?

O C1 C2 120.6(6) . . ?

O C1 C6 120.2(6) . . ?

C2 C1 C6 119.1(6) . . ?

C5 C6 C1 115.9(7) . . ?

C5 C6 C14 121.5(7) . . ?

C1 C6 C14 122.6(7) . . ?

C4 C5 C6 126.2(8) . . ?

C4 C5 H5A 116.9 . . ?

C6 C5 H5A 116.9 . . ?

C3 C4 C5 116.1(7) . . ?

C3 C4 C18 123.0(7) . . ?

C5 C4 C18 120.9(7) . . ?

C4 C3 C2 122.1(7) . . ?

C4 C3 H3A 118.9 . . ?

C2 C3 H3A 118.9 . . ?

C3 C2 C1 120.3(7) . . ?

C3 C2 C7 116.5(7) . . ?

C1 C2 C7 123.2(6) . . ?

N C7 C2 126.3(7) . . ?

N C7 H7A 116.8 . . ?

C2 C7 H7A 116.8 . . ?

C9 C8 C13 122.6(7) . . ?

C9 C8 N 119.4(6) . . ?

C13 C8 N 117.9(7) . . ?

C10 C9 C8 117.5(8) . . ?

C10 C9 C25 120.2(8) . . ?

C8 C9 C25 122.3(7) . . ?

C11 C10 C9 120.7(9) . . ?

C11 C10 H10A 119.7 . . ?

C9 C10 H10A 119.7 . . ?

C12 C11 C10 120.5(10) . . ?

C12 C11 H11A 119.8 . . ?

C10 C11 H11A 119.8 . . ?

C11 C12 C13 122.5(9) . . ?

C11 C12 H12A 118.8 . . ?

C13 C12 H12A 118.8 . . ?

C12 C13 C8 116.1(8) . . ?

C12 C13 C22 120.8(8) . . ?

C8 C13 C22 123.0(8) . . ?

C16 C14 C15 110.3(8) . . ?

C16 C14 C17 105.0(8) . . ?

C15 C14 C17 107.8(8) . . ?

C16 C14 C6 113.1(7) . . ?

C15 C14 C6 111.0(7) . . ?

C17 C14 C6 109.2(7) . . ?

C14 C15 H15A 109.5 . . ?

C14 C15 H15B 109.5 . . ?

H15A C15 H15B 109.5 . . ?

C14 C15 H15C 109.5 . . ?

H15A C15 H15C 109.5 . . ?

H15B C15 H15C 109.5 . . ?

C14 C16 H16A 109.5 . . ?

C14 C16 H16B 109.5 . . ?

H16A C16 H16B 109.5 . . ?

C14 C16 H16C 109.5 . . ?

H16A C16 H16C 109.5 . . ?

H16B C16 H16C 109.5 . . ?

C14 C17 H17A 109.5 . . ?

C14 C17 H17B 109.5 . . ?

H17A C17 H17B 109.5 . . ?

C14 C17 H17C 109.5 . . ?

H17A C17 H17C 109.5 . . ?

H17B C17 H17C 109.5 . . ?

C21 C18 C19 107.4(8) . . ?

C21 C18 C4 113.2(8) . . ?

C19 C18 C4 109.3(7) . . ?

C21 C18 C20 108.2(8) . . ?

C19 C18 C20 107.5(8) . . ?

C4 C18 C20 111.0(7) . . ?

C18 C19 H19A 109.5 . . ?

C18 C19 H19B 109.5 . . ?

H19A C19 H19B 109.5 . . ?

C18 C19 H19C 109.5 . . ?

H19A C19 H19C 109.5 . . ?

H19B C19 H19C 109.5 . . ?

C18 C20 H20A 109.5 . . ?

C18 C20 H20B 109.5 . . ?

H20A C20 H20B 109.5 . . ?

C18 C20 H20C 109.5 . . ?

H20A C20 H20C 109.5 . . ?

H20B C20 H20C 109.5 . . ?

C18 C21 H21A 109.5 . . ?

C18 C21 H21B 109.5 . . ?

H21A C21 H21B 109.5 . . ?

C18 C21 H21C 109.5 . . ?

H21A C21 H21C 109.5 . . ?

H21B C21 H21C 109.5 . . ?

C23 C22 C13 111.3(8) . . ?

C23 C22 C24 109.9(9) . . ?

C13 C22 C24 110.6(8) . . ?

C23 C22 H22A 108.3 . . ?

C13 C22 H22A 108.3 . . ?

C24 C22 H22A 108.3 . . ?

C22 C23 H23A 109.5 . . ?

C22 C23 H23B 109.5 . . ?

H23A C23 H23B 109.5 . . ?

C22 C23 H23C 109.5 . . ?

H23A C23 H23C 109.5 . . ?

H23B C23 H23C 109.5 . . ?

C22 C24 H24A 109.5 . . ?

C22 C24 H24B 109.5 . . ?

H24A C24 H24B 109.5 . . ?

C22 C24 H24C 109.5 . . ?

H24A C24 H24C 109.5 . . ?

H24B C24 H24C 109.5 . . ?

C9 C25 C27 110.7(7) . . ?

C9 C25 C26 111.8(8) . . ?

C27 C25 C26 111.3(8) . . ?

C9 C25 H25A 107.6 . . ?

C27 C25 H25A 107.6 . . ?

C26 C25 H25A 107.6 . . ?

C25 C26 H26A 109.5 . . ?

C25 C26 H26B 109.5 . . ?

H26A C26 H26B 109.5 . . ?

C25 C26 H26C 109.5 . . ?

H26A C26 H26C 109.5 . . ?

H26B C26 H26C 109.5 . . ?

C25 C27 H27A 109.5 . . ?

C25 C27 H27B 109.5 . . ?

H27A C27 H27B 109.5 . . ?

C25 C27 H27C 109.5 . . ?

H27A C27 H27C 109.5 . . ?

H27B C27 H27C 109.5 . . ?

 

loop_

 _geom_torsion_atom_site_label_1

 _geom_torsion_atom_site_label_2

 _geom_torsion_atom_site_label_3

 _geom_torsion_atom_site_label_4

 _geom_torsion

 _geom_torsion_site_symmetry_1

 _geom_torsion_site_symmetry_2

 _geom_torsion_site_symmetry_3

 _geom_torsion_site_symmetry_4

 _geom_torsion_publ_flag

O V O C1 55.2(5) 2_556 . . . ?

N V O C1 -40.2(5) . . . . ?

N V O C1 143.1(5) 2_556 . . . ?

Cl V O C1 -124.8(5) . . . . ?

O V N C7 25.5(6) . . . . ?

O V N C7 -74.1(6) 2_556 . . . ?

N V N C7 155.9(5) 2_556 . . . ?

Cl V N C7 155.8(5) . . . . ?

O V N C8 -147.7(5) . . . . ?

O V N C8 112.6(5) 2_556 . . . ?

N V N C8 -17.4(5) 2_556 . . . ?

Cl V N C8 -17.4(5) . . . . ?

V O C1 C2 31.9(9) . . . . ?

V O C1 C6 -147.7(5) . . . . ?

O C1 C6 C5 175.4(6) . . . . ?

C2 C1 C6 C5 -4.2(10) . . . . ?

O C1 C6 C14 -5.3(10) . . . . ?

C2 C1 C6 C14 175.0(7) . . . . ?

C1 C6 C5 C4 1.7(12) . . . . ?

C14 C6 C5 C4 -177.6(7) . . . . ?

C6 C5 C4 C3 2.9(12) . . . . ?

C6 C5 C4 C18 -175.9(7) . . . . ?

C5 C4 C3 C2 -4.9(11) . . . . ?

C18 C4 C3 C2 173.8(7) . . . . ?

C4 C3 C2 C1 2.4(11) . . . . ?

C4 C3 C2 C7 -179.0(7) . . . . ?

O C1 C2 C3 -177.3(6) . . . . ?

C6 C1 C2 C3 2.4(10) . . . . ?

O C1 C2 C7 4.3(11) . . . . ?

C6 C1 C2 C7 -176.0(7) . . . . ?

C8 N C7 C2 168.8(7) . . . . ?

V N C7 C2 -5.2(10) . . . . ?

C3 C2 C7 N 165.4(7) . . . . ?

C1 C2 C7 N -16.1(11) . . . . ?

C7 N C8 C9 108.5(8) . . . . ?

V N C8 C9 -77.8(8) . . . . ?

C7 N C8 C13 -73.7(9) . . . . ?

V N C8 C13 100.0(7) . . . . ?

C13 C8 C9 C10 3.3(12) . . . . ?

N C8 C9 C10 -179.0(7) . . . . ?

C13 C8 C9 C25 -176.8(7) . . . . ?

N C8 C9 C25 0.9(11) . . . . ?

C8 C9 C10 C11 -1.2(13) . . . . ?

C25 C9 C10 C11 178.8(8) . . . . ?

C9 C10 C11 C12 -0.2(14) . . . . ?

C10 C11 C12 C13 -0.4(15) . . . . ?

C11 C12 C13 C8 2.3(13) . . . . ?

C11 C12 C13 C22 -175.1(8) . . . . ?

C9 C8 C13 C12 -3.7(12) . . . . ?

N C8 C13 C12 178.5(7) . . . . ?

C9 C8 C13 C22 173.6(8) . . . . ?

N C8 C13 C22 -4.2(11) . . . . ?

C5 C6 C14 C16 5.6(11) . . . . ?

C1 C6 C14 C16 -173.6(7) . . . . ?

C5 C6 C14 C15 -119.0(9) . . . . ?

C1 C6 C14 C15 61.7(10) . . . . ?

C5 C6 C14 C17 122.2(8) . . . . ?

C1 C6 C14 C17 -57.0(10) . . . . ?

C3 C4 C18 C21 5.6(11) . . . . ?

C5 C4 C18 C21 -175.8(8) . . . . ?

C3 C4 C18 C19 -114.1(9) . . . . ?

C5 C4 C18 C19 64.5(10) . . . . ?

C3 C4 C18 C20 127.5(8) . . . . ?

C5 C4 C18 C20 -53.9(10) . . . . ?

C12 C13 C22 C23 -71.7(11) . . . . ?

C8 C13 C22 C23 111.2(9) . . . . ?

C12 C13 C22 C24 50.9(11) . . . . ?

C8 C13 C22 C24 -126.3(9) . . . . ?

C10 C9 C25 C27 -64.9(11) . . . . ?

C8 C9 C25 C27 115.1(9) . . . . ?

C10 C9 C25 C26 59.8(11) . . . . ?

C8 C9 C25 C26 -120.2(9) . . . . ?

 

_diffrn_measured_fraction_theta_max    0.996

_diffrn_reflns_theta_full              26.06

_diffrn_measured_fraction_theta_full   0.996

_refine_diff_density_max    1.243

_refine_diff_density_min   -0.849

_refine_diff_density_rms    0.145


  
data_3k 
  
_audit_creation_method            SHELXL-97 
_chemical_name_systematic 
; 
 ? 
; 
_chemical_name_common             ? 
_chemical_melting_point           ? 
_chemical_formula_moiety          ? 
_chemical_formula_sum 
 'C38 H40 Br4 Cl N2 O5 V' 
_chemical_formula_weight          1010.75 
  
loop_ 
 _atom_type_symbol 
 _atom_type_description 
 _atom_type_scat_dispersion_real 
 _atom_type_scat_dispersion_imag 
 _atom_type_scat_source 
 'C'  'C'   0.0033   0.0016 
 'International Tables Vol C Tables 4.2.6.8 and 6.1.1.4' 
 'H'  'H'   0.0000   0.0000 
 'International Tables Vol C Tables 4.2.6.8 and 6.1.1.4' 
 'N'  'N'   0.0061   0.0033 
 'International Tables Vol C Tables 4.2.6.8 and 6.1.1.4' 
 'O'  'O'   0.0106   0.0060 
 'International Tables Vol C Tables 4.2.6.8 and 6.1.1.4' 
 'V'  'V'   0.3005   0.5294 
 'International Tables Vol C Tables 4.2.6.8 and 6.1.1.4' 
 'Br'  'Br'  -0.2901   2.4595 
 'International Tables Vol C Tables 4.2.6.8 and 6.1.1.4' 
 'Cl'  'Cl'   0.1484   0.1585 
 'International Tables Vol C Tables 4.2.6.8 and 6.1.1.4' 
  
_symmetry_cell_setting            Monoclinic 
_symmetry_space_group_name_H-M    C2/c 
  
loop_ 
 _symmetry_equiv_pos_as_xyz 
 'x, y, z' 
 '-x, y, -z+1/2' 
 'x+1/2, y+1/2, z' 
 '-x+1/2, y+1/2, -z+1/2' 
 '-x, -y, -z' 
 'x, -y, z-1/2' 
 '-x+1/2, -y+1/2, -z' 
 'x+1/2, -y+1/2, z-1/2' 
  
_cell_length_a                    23.1831(18) 
_cell_length_b                    10.0939(8) 
_cell_length_c                    16.7657(13) 
_cell_angle_alpha                 90.00 
_cell_angle_beta                  101.7550(10) 
_cell_angle_gamma                 90.00 
_cell_volume                      3841.0(5) 
_cell_formula_units_Z             4 
_cell_measurement_temperature     185(2) 
_cell_measurement_reflns_used     4379 
_cell_measurement_theta_min       2.44 
_cell_measurement_theta_max       26.03 
  
_exptl_crystal_description        ? 
_exptl_crystal_colour             ? 
_exptl_crystal_size_max           0.38 
_exptl_crystal_size_mid           0.19 
_exptl_crystal_size_min           0.10 
_exptl_crystal_density_meas       ? 
_exptl_crystal_density_diffrn     1.748 
_exptl_crystal_density_method     'not measured' 
_exptl_crystal_F_000              2008 
_exptl_absorpt_coefficient_mu     4.534 
_exptl_absorpt_correction_type    Multi-scan 
_exptl_absorpt_correction_T_min   0.2756 
_exptl_absorpt_correction_T_max   0.6726 
_exptl_absorpt_process_details    ? 
  
_exptl_special_details 
; 
 ? 
; 
  
_diffrn_ambient_temperature       185(2) 
_diffrn_radiation_wavelength      0.71073 
_diffrn_radiation_type            MoK\a 
_diffrn_radiation_source          'fine-focus sealed tube' 
_diffrn_radiation_monochromator   graphite 
_diffrn_measurement_device_type   'Bruker SMART APEX CCD area detector' 
_diffrn_measurement_method        '\f and \w scans' 
_diffrn_detector_area_resol_mean  ? 
_diffrn_standards_number          ? 
_diffrn_standards_interval_count  ? 
_diffrn_standards_interval_time   ? 
_diffrn_standards_decay_%         ? 
_diffrn_reflns_number             10555 
_diffrn_reflns_av_R_equivalents   0.0242 
_diffrn_reflns_av_sigmaI/netI     0.0286 
_diffrn_reflns_limit_h_min        -28 
_diffrn_reflns_limit_h_max        26 
_diffrn_reflns_limit_k_min        -12 
_diffrn_reflns_limit_k_max        8 
_diffrn_reflns_limit_l_min        -20 
_diffrn_reflns_limit_l_max        19 
_diffrn_reflns_theta_min          1.79 
_diffrn_reflns_theta_max          26.04 
_reflns_number_total              3809 
_reflns_number_gt                 3214 
_reflns_threshold_expression      >2sigma(I) 
  
_computing_data_collection        'Bruker SMART' 
_computing_cell_refinement        'Bruker SMART' 
_computing_data_reduction         'Bruker SAINT' 
_computing_structure_solution     'SHELXS-97 (Sheldrick, 1990)' 
_computing_structure_refinement   'SHELXL-97 (Sheldrick, 1997)' 
_computing_molecular_graphics     'Bruker SHELXTL' 
_computing_publication_material   'Bruker SHELXTL' 
  
_refine_special_details 
; 
 Refinement of F^2^ against ALL reflections.  The weighted R-factor wR and 
 goodness of fit S are based on F^2^, conventional R-factors R are based 
 on F, with F set to zero for negative F^2^. The threshold expression of 
 F^2^ > 2sigma(F^2^) is used only for calculating R-factors(gt) etc. and is 
 not relevant to the choice of reflections for refinement.  R-factors based 
 on F^2^ are statistically about twice as large as those based on F, and R- 
 factors based on ALL data will be even larger. 
; 
  
_refine_ls_structure_factor_coef  Fsqd 
_refine_ls_matrix_type            full 
_refine_ls_weighting_scheme       calc 
_refine_ls_weighting_details 
 'calc w=1/[\s^2^(Fo^2^)+(0.0427P)^2^+2.7216P] where P=(Fo^2^+2Fc^2^)/3' 
_atom_sites_solution_primary      direct 
_atom_sites_solution_secondary    difmap 
_atom_sites_solution_hydrogens    geom 
_refine_ls_hydrogen_treatment     constr 
_refine_ls_extinction_method      none 
_refine_ls_extinction_coef        ? 
_refine_ls_number_reflns          3809 
_refine_ls_number_parameters      232 
_refine_ls_number_restraints      0 
_refine_ls_R_factor_all           0.0374 
_refine_ls_R_factor_gt            0.0290 
_refine_ls_wR_factor_ref          0.0754 
_refine_ls_wR_factor_gt           0.0715 
_refine_ls_goodness_of_fit_ref    1.033 
_refine_ls_restrained_S_all       1.033 
_refine_ls_shift/su_max           0.001 
_refine_ls_shift/su_mean          0.000 
  
loop_ 
 _atom_site_label 
 _atom_site_type_symbol 
 _atom_site_fract_x 
 _atom_site_fract_y 
 _atom_site_fract_z 
 _atom_site_U_iso_or_equiv 
 _atom_site_adp_type 
 _atom_site_occupancy 
 _atom_site_symmetry_multiplicity 
 _atom_site_calc_flag 
 _atom_site_refinement_flags 
 _atom_site_disorder_assembly 
 _atom_site_disorder_group 
Br1 Br 0.559245(12) 0.31770(3) 0.532855(17) 0.03242(10) Uani 1 1 d . . . 
Br2 Br 0.785892(12) 0.46908(3) 0.485055(19) 0.03589(10) Uani 1 1 d . . . 
V1 V 0.5000 0.20670(6) 0.2500 0.01956(14) Uani 1 2 d S . . 
O1 O 0.54535(7) 0.23349(17) 0.35873(11) 0.0229(4) Uani 1 1 d . . . 
O2 O 0.5000 0.4195(2) 0.2500 0.0320(6) Uani 1 2 d S . . 
N1 N 0.58001(9) 0.2213(2) 0.20444(13) 0.0208(4) Uani 1 1 d . . . 
Cl1 Cl 0.5000 -0.01944(9) 0.2500 0.0321(2) Uani 1 2 d S . . 
C1 C 0.59785(11) 0.2849(2) 0.38414(16) 0.0214(5) Uani 1 1 d . . . 
C2 C 0.61496(11) 0.3306(2) 0.46538(16) 0.0224(5) Uani 1 1 d . . . 
C3 C 0.67000(11) 0.3839(3) 0.49613(16) 0.0264(6) Uani 1 1 d . . . 
H3 H 0.6802 0.4126 0.5512 0.032 Uiso 1 1 calc R . . 
C4 C 0.71008(11) 0.3948(3) 0.44529(17) 0.0267(6) Uani 1 1 d . . . 
C5 C 0.69570(11) 0.3542(3) 0.36591(17) 0.0271(6) Uani 1 1 d . . . 
H5 H 0.7237 0.3627 0.3319 0.033 Uiso 1 1 calc R . . 
C6 C 0.63984(11) 0.2999(3) 0.33407(16) 0.0240(6) Uani 1 1 d . . . 
C7 C 0.62880(11) 0.2631(3) 0.24894(16) 0.0243(6) Uani 1 1 d . . . 
H7 H 0.6613 0.2705 0.2226 0.029 Uiso 1 1 calc R . . 
C8 C 0.58254(10) 0.1993(2) 0.11982(16) 0.0214(5) Uani 1 1 d . . . 
C9 C 0.60410(11) 0.2981(3) 0.07600(17) 0.0272(6) Uani 1 1 d . . . 
H9 H 0.6160 0.3808 0.1010 0.033 Uiso 1 1 calc R . . 
C10 C 0.60815(12) 0.2758(3) -0.00409(17) 0.0307(6) Uani 1 1 d . . . 
H10 H 0.6230 0.3434 -0.0339 0.037 Uiso 1 1 calc R . . 
C11 C 0.59076(11) 0.1559(3) -0.04098(17) 0.0279(6) Uani 1 1 d . . . 
H11 H 0.5935 0.1409 -0.0961 0.034 Uiso 1 1 calc R . . 
C12 C 0.56942(11) 0.0576(3) 0.00279(17) 0.0265(6) Uani 1 1 d . . . 
H12 H 0.5577 -0.0250 -0.0224 0.032 Uiso 1 1 calc R . . 
C13 C 0.56498(11) 0.0785(3) 0.08337(16) 0.0245(6) Uani 1 1 d . . . 
H13 H 0.5501 0.0109 0.1131 0.029 Uiso 1 1 calc R . . 
C14 C 0.51570(16) 0.5033(3) 0.18726(19) 0.0385(8) Uani 1 1 d . . . 
H14A H 0.4953 0.4734 0.1325 0.046 Uiso 1 1 calc R . . 
H14B H 0.5587 0.5006 0.1899 0.046 Uiso 1 1 calc R . . 
C15 C 0.49685(19) 0.6388(3) 0.2037(2) 0.0520(10) Uani 1 1 d . . . 
H15A H 0.4556 0.6553 0.1758 0.062 Uiso 1 1 calc R . . 
H15B H 0.5227 0.7063 0.1862 0.062 Uiso 1 1 calc R . . 
O3 O 0.75079(10) 0.3860(2) 0.18583(15) 0.0499(6) Uani 1 1 d . . . 
C18 C 0.80503(17) 0.4462(4) 0.2256(2) 0.0538(9) Uani 1 1 d . . . 
H18A H 0.7981 0.5092 0.2679 0.065 Uiso 1 1 calc R . . 
H18B H 0.8233 0.4947 0.1858 0.065 Uiso 1 1 calc R . . 
C19 C 0.84427(17) 0.3348(4) 0.2635(3) 0.0617(11) Uani 1 1 d . . . 
H19A H 0.8439 0.3265 0.3223 0.074 Uiso 1 1 calc R . . 
H19B H 0.8853 0.3492 0.2571 0.074 Uiso 1 1 calc R . . 
C20 C 0.81805(19) 0.2118(4) 0.2170(3) 0.0685(12) Uani 1 1 d . . . 
H20A H 0.8477 0.1660 0.1919 0.082 Uiso 1 1 calc R . . 
H20B H 0.8030 0.1492 0.2534 0.082 Uiso 1 1 calc R . . 
C21 C 0.76821(15) 0.2663(4) 0.1524(2) 0.0487(9) Uani 1 1 d . . . 
H21A H 0.7819 0.2842 0.1012 0.058 Uiso 1 1 calc R . . 
H21B H 0.7350 0.2029 0.1409 0.058 Uiso 1 1 calc R . . 
  
loop_ 
 _atom_site_aniso_label 
 _atom_site_aniso_U_11 
 _atom_site_aniso_U_22 
 _atom_site_aniso_U_33 
 _atom_site_aniso_U_23 
 _atom_site_aniso_U_13 
 _atom_site_aniso_U_12 
Br1 0.03602(17) 0.04051(18) 0.02352(16) -0.00659(12) 0.01267(12) -0.00498(12) 
Br2 0.02754(16) 0.04052(18) 0.03623(19) -0.00518(13) -0.00148(12) -0.01015(12) 
V1 0.0194(3) 0.0222(3) 0.0174(3) 0.000 0.0046(2) 0.000 
O1 0.0202(9) 0.0288(9) 0.0199(9) -0.0010(8) 0.0049(7) -0.0038(7) 
O2 0.0617(19) 0.0158(12) 0.0244(15) 0.000 0.0224(13) 0.000 
N1 0.0223(11) 0.0208(10) 0.0200(11) -0.0020(9) 0.0055(9) -0.0013(8) 
Cl1 0.0392(5) 0.0231(5) 0.0369(6) 0.000 0.0144(4) 0.000 
C1 0.0237(13) 0.0186(12) 0.0222(14) 0.0003(10) 0.0051(11) 0.0009(10) 
C2 0.0277(13) 0.0231(13) 0.0172(13) -0.0002(10) 0.0067(11) 0.0004(10) 
C3 0.0305(14) 0.0257(14) 0.0217(14) -0.0034(11) 0.0023(11) 0.0004(11) 
C4 0.0207(13) 0.0272(14) 0.0293(15) -0.0007(12) -0.0017(11) -0.0047(11) 
C5 0.0240(13) 0.0319(15) 0.0261(15) -0.0017(12) 0.0065(11) -0.0040(11) 
C6 0.0237(13) 0.0263(14) 0.0216(14) -0.0024(11) 0.0034(11) -0.0008(10) 
C7 0.0241(13) 0.0282(14) 0.0226(14) -0.0015(11) 0.0098(11) -0.0004(11) 
C8 0.0161(12) 0.0292(14) 0.0187(13) -0.0025(11) 0.0029(10) 0.0027(10) 
C9 0.0280(14) 0.0279(14) 0.0268(15) -0.0045(11) 0.0081(12) -0.0041(11) 
C10 0.0328(15) 0.0356(15) 0.0260(15) 0.0029(12) 0.0113(12) -0.0031(12) 
C11 0.0258(14) 0.0400(16) 0.0185(14) -0.0035(12) 0.0058(11) 0.0053(12) 
C12 0.0216(13) 0.0297(14) 0.0276(15) -0.0068(12) 0.0035(11) 0.0016(11) 
C13 0.0221(13) 0.0262(13) 0.0255(15) -0.0009(11) 0.0052(11) 0.0011(10) 
C14 0.072(2) 0.0248(14) 0.0255(16) 0.0033(12) 0.0251(15) -0.0040(14) 
C15 0.092(3) 0.0337(17) 0.040(2) 0.0093(15) 0.037(2) 0.0086(18) 
O3 0.0429(13) 0.0542(14) 0.0543(15) -0.0099(12) 0.0138(11) -0.0040(11) 
C18 0.057(2) 0.053(2) 0.055(2) -0.0123(18) 0.0211(18) -0.0201(18) 
C19 0.044(2) 0.081(3) 0.058(3) -0.003(2) 0.0064(19) -0.0116(19) 
C20 0.059(2) 0.053(2) 0.095(4) 0.003(2) 0.020(2) -0.0031(19) 
C21 0.0415(18) 0.056(2) 0.052(2) -0.0125(17) 0.0175(16) -0.0114(16) 
  
_geom_special_details 
; 
 All esds (except the esd in the dihedral angle between two l.s. planes) 
 are estimated using the full covariance matrix.  The cell esds are taken 
 into account individually in the estimation of esds in distances, angles 
 and torsion angles; correlations between esds in cell parameters are only 
 used when they are defined by crystal symmetry.  An approximate (isotropic) 
 treatment of cell esds is used for estimating esds involving l.s. planes. 
; 
  
loop_ 
 _geom_bond_atom_site_label_1 
 _geom_bond_atom_site_label_2 
 _geom_bond_distance 
 _geom_bond_site_symmetry_2 
 _geom_bond_publ_flag 
Br1 C2 1.887(3) . ? 
Br2 C4 1.902(3) . ? 
V1 O1 1.9289(17) . ? 
V1 O1 1.9290(17) 2_655 ? 
V1 O2 2.148(3) . ? 
V1 N1 2.150(2) . ? 
V1 N1 2.150(2) 2_655 ? 
V1 Cl1 2.2826(11) . ? 
O1 C1 1.312(3) . ? 
O2 C14 1.452(3) . ? 
O2 C14 1.452(3) 2_655 ? 
N1 C7 1.292(3) . ? 
N1 C8 1.449(3) . ? 
C1 C2 1.416(4) . ? 
C1 C6 1.417(4) . ? 
C2 C3 1.384(4) . ? 
C3 C4 1.388(4) . ? 
C3 H3 0.9500 . ? 
C4 C5 1.367(4) . ? 
C5 C6 1.407(4) . ? 
C5 H5 0.9500 . ? 
C6 C7 1.446(4) . ? 
C7 H7 0.9500 . ? 
C8 C13 1.387(4) . ? 
C8 C9 1.390(4) . ? 
C9 C10 1.383(4) . ? 
C9 H9 0.9500 . ? 
C10 C11 1.382(4) . ? 
C10 H10 0.9500 . ? 
C11 C12 1.384(4) . ? 
C11 H11 0.9500 . ? 
C12 C13 1.392(4) . ? 
C12 H12 0.9500 . ? 
C13 H13 0.9500 . ? 
C14 C15 1.478(4) . ? 
C14 H14A 0.9900 . ? 
C14 H14B 0.9900 . ? 
C15 C15 1.530(6) 2_655 ? 
C15 H15A 0.9900 . ? 
C15 H15B 0.9900 . ? 
O3 C21 1.425(4) . ? 
O3 C18 1.433(4) . ? 
C18 C19 1.504(6) . ? 
C18 H18A 0.9900 . ? 
C18 H18B 0.9900 . ? 
C19 C20 1.525(6) . ? 
C19 H19A 0.9900 . ? 
C19 H19B 0.9900 . ? 
C20 C21 1.518(5) . ? 
C20 H20A 0.9900 . ? 
C20 H20B 0.9900 . ? 
C21 H21A 0.9900 . ? 
C21 H21B 0.9900 . ? 
  
loop_ 
 _geom_angle_atom_site_label_1 
 _geom_angle_atom_site_label_2 
 _geom_angle_atom_site_label_3 
 _geom_angle 
 _geom_angle_site_symmetry_1 
 _geom_angle_site_symmetry_3 
 _geom_angle_publ_flag 
O1 V1 O1 163.88(11) . 2_655 ? 
O1 V1 O2 81.94(5) . . ? 
O1 V1 O2 81.94(5) 2_655 . ? 
O1 V1 N1 89.00(8) . . ? 
O1 V1 N1 89.90(8) 2_655 . ? 
O2 V1 N1 86.06(6) . . ? 
O1 V1 N1 89.90(8) . 2_655 ? 
O1 V1 N1 88.99(8) 2_655 2_655 ? 
O2 V1 N1 86.06(6) . 2_655 ? 
N1 V1 N1 172.13(11) . 2_655 ? 
O1 V1 Cl1 98.06(5) . . ? 
O1 V1 Cl1 98.06(5) 2_655 . ? 
O2 V1 Cl1 180.0 . . ? 
N1 V1 Cl1 93.94(6) . . ? 
N1 V1 Cl1 93.94(6) 2_655 . ? 
C1 O1 V1 130.80(16) . . ? 
C14 O2 C14 108.8(3) . 2_655 ? 
C14 O2 V1 125.60(14) . . ? 
C14 O2 V1 125.60(14) 2_655 . ? 
C7 N1 C8 114.2(2) . . ? 
C7 N1 V1 122.30(17) . . ? 
C8 N1 V1 123.18(15) . . ? 
O1 C1 C2 120.1(2) . . ? 
O1 C1 C6 123.6(2) . . ? 
C2 C1 C6 116.3(2) . . ? 
C3 C2 C1 122.8(2) . . ? 
C3 C2 Br1 119.7(2) . . ? 
C1 C2 Br1 117.53(19) . . ? 
C2 C3 C4 119.0(2) . . ? 
C2 C3 H3 120.5 . . ? 
C4 C3 H3 120.5 . . ? 
C5 C4 C3 120.9(2) . . ? 
C5 C4 Br2 119.0(2) . . ? 
C3 C4 Br2 120.2(2) . . ? 
C4 C5 C6 120.6(2) . . ? 
C4 C5 H5 119.7 . . ? 
C6 C5 H5 119.7 . . ? 
C5 C6 C1 120.5(2) . . ? 
C5 C6 C7 116.0(2) . . ? 
C1 C6 C7 123.5(2) . . ? 
N1 C7 C6 127.7(2) . . ? 
N1 C7 H7 116.1 . . ? 
C6 C7 H7 116.1 . . ? 
C13 C8 C9 120.1(2) . . ? 
C13 C8 N1 119.9(2) . . ? 
C9 C8 N1 119.9(2) . . ? 
C10 C9 C8 120.0(2) . . ? 
C10 C9 H9 120.0 . . ? 
C8 C9 H9 120.0 . . ? 
C11 C10 C9 120.4(3) . . ? 
C11 C10 H10 119.8 . . ? 
C9 C10 H10 119.8 . . ? 
C10 C11 C12 119.6(3) . . ? 
C10 C11 H11 120.2 . . ? 
C12 C11 H11 120.2 . . ? 
C11 C12 C13 120.8(3) . . ? 
C11 C12 H12 119.6 . . ? 
C13 C12 H12 119.6 . . ? 
C8 C13 C12 119.2(2) . . ? 
C8 C13 H13 120.4 . . ? 
C12 C13 H13 120.4 . . ? 
O2 C14 C15 106.0(2) . . ? 
O2 C14 H14A 110.5 . . ? 
C15 C14 H14A 110.5 . . ? 
O2 C14 H14B 110.5 . . ? 
C15 C14 H14B 110.5 . . ? 
H14A C14 H14B 108.7 . . ? 
C14 C15 C15 102.6(2) . 2_655 ? 
C14 C15 H15A 111.2 . . ? 
C15 C15 H15A 111.2 2_655 . ? 
C14 C15 H15B 111.2 . . ? 
C15 C15 H15B 111.2 2_655 . ? 
H15A C15 H15B 109.2 . . ? 
C21 O3 C18 104.5(3) . . ? 
O3 C18 C19 106.1(3) . . ? 
O3 C18 H18A 110.5 . . ? 
C19 C18 H18A 110.5 . . ? 
O3 C18 H18B 110.5 . . ? 
C19 C18 H18B 110.5 . . ? 
H18A C18 H18B 108.7 . . ? 
C18 C19 C20 104.4(3) . . ? 
C18 C19 H19A 110.9 . . ? 
C20 C19 H19A 110.9 . . ? 
C18 C19 H19B 110.9 . . ? 
C20 C19 H19B 110.9 . . ? 
H19A C19 H19B 108.9 . . ? 
C21 C20 C19 103.6(3) . . ? 
C21 C20 H20A 111.0 . . ? 
C19 C20 H20A 111.0 . . ? 
C21 C20 H20B 111.0 . . ? 
C19 C20 H20B 111.0 . . ? 
H20A C20 H20B 109.0 . . ? 
O3 C21 C20 105.2(3) . . ? 
O3 C21 H21A 110.7 . . ? 
C20 C21 H21A 110.7 . . ? 
O3 C21 H21B 110.7 . . ? 
C20 C21 H21B 110.7 . . ? 
H21A C21 H21B 108.8 . . ? 
  
_diffrn_measured_fraction_theta_max    0.999 
_diffrn_reflns_theta_full              26.04 
_diffrn_measured_fraction_theta_full   0.999 
_refine_diff_density_max    0.612 
_refine_diff_density_min   -0.464 
_refine_diff_density_rms    0.084 
